# Supplementary material for: Arthropod Community Responses Reveal Potential Predators and Prey of Entomopathogenic Nematodes in a Citrus Orchard
Source: MDPI journal article supplement (doi:10.3390/agronomy12102502), 2022-10-13
Supplement: s1 [file s1]

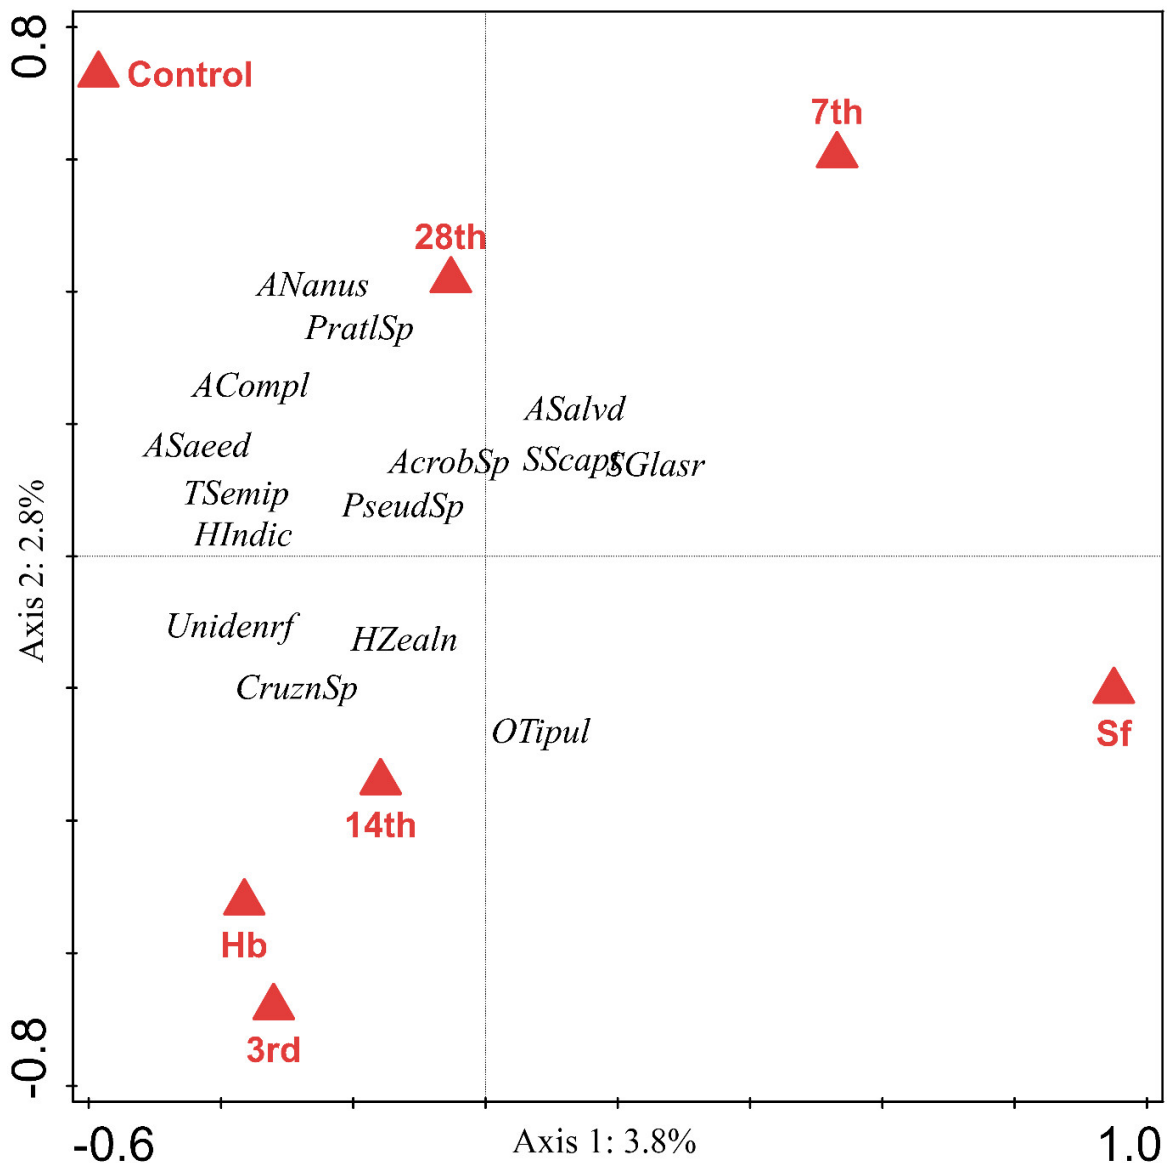

**Figure S1.** Redundancy Analysis (RDA) depicting the response of nematodes to the treatment (*Steinernema feltiae*, Sf; *Heterorhabditis bacteriophora* Hb; Control) and time (3<sup>rd</sup>, 7<sup>th</sup>, 14<sup>th</sup>, 28<sup>th</sup> day after treatment). Species included in the analysis were *Actus salvadoricus* (ASalvd), *Heterorhabditis indica* (HIndic), *Steinernema scapterisci* (SScapt), *Acrobeloides saeedi* (ASaeed), *Heterorhabditis zealandica* (HZealn), *Steinernema glaseri* (SGlasr), *Acrobeloides complexus* (ACompl), *Tylenchulus semipenetrans* (TSemip), *Acrobeloides nanus* (ANanus), *Oscheius tipulae* (OTipul), *Pseudacrobeloides* sp. (PseudSp), *Unidentified nematode species* (Unidenrf), *Cruznema* sp. (CruznSp), *Pratylenchus* sp (PratSp).
