# Supplementary material for: Arthropod Community Responses Reveal Potential Predators and Prey of Entomopathogenic Nematodes in a Citrus Orchard
Source: MDPI journal article supplement (doi:10.3390/agronomy12102502), 2022-10-13
Supplement: s1 [file s1]

Archive with 5 entries (5 files):
- supplementary figure S1.pdf
- supplementary figure S2.pdf
- supplementary table S1.xlsx
- supplementary table S2.xlsx
- supplementary table S3.xlsx
