# Supplementary material for: Arthropod Community Responses Reveal Potential Predators and Prey of Entomopathogenic Nematodes in a Citrus Orchard
Source: MDPI journal article supplement (doi:10.3390/agronomy12102502), 2022-10-13
Supplement: s1 [file s1 › supplementary figure S2.pdf]

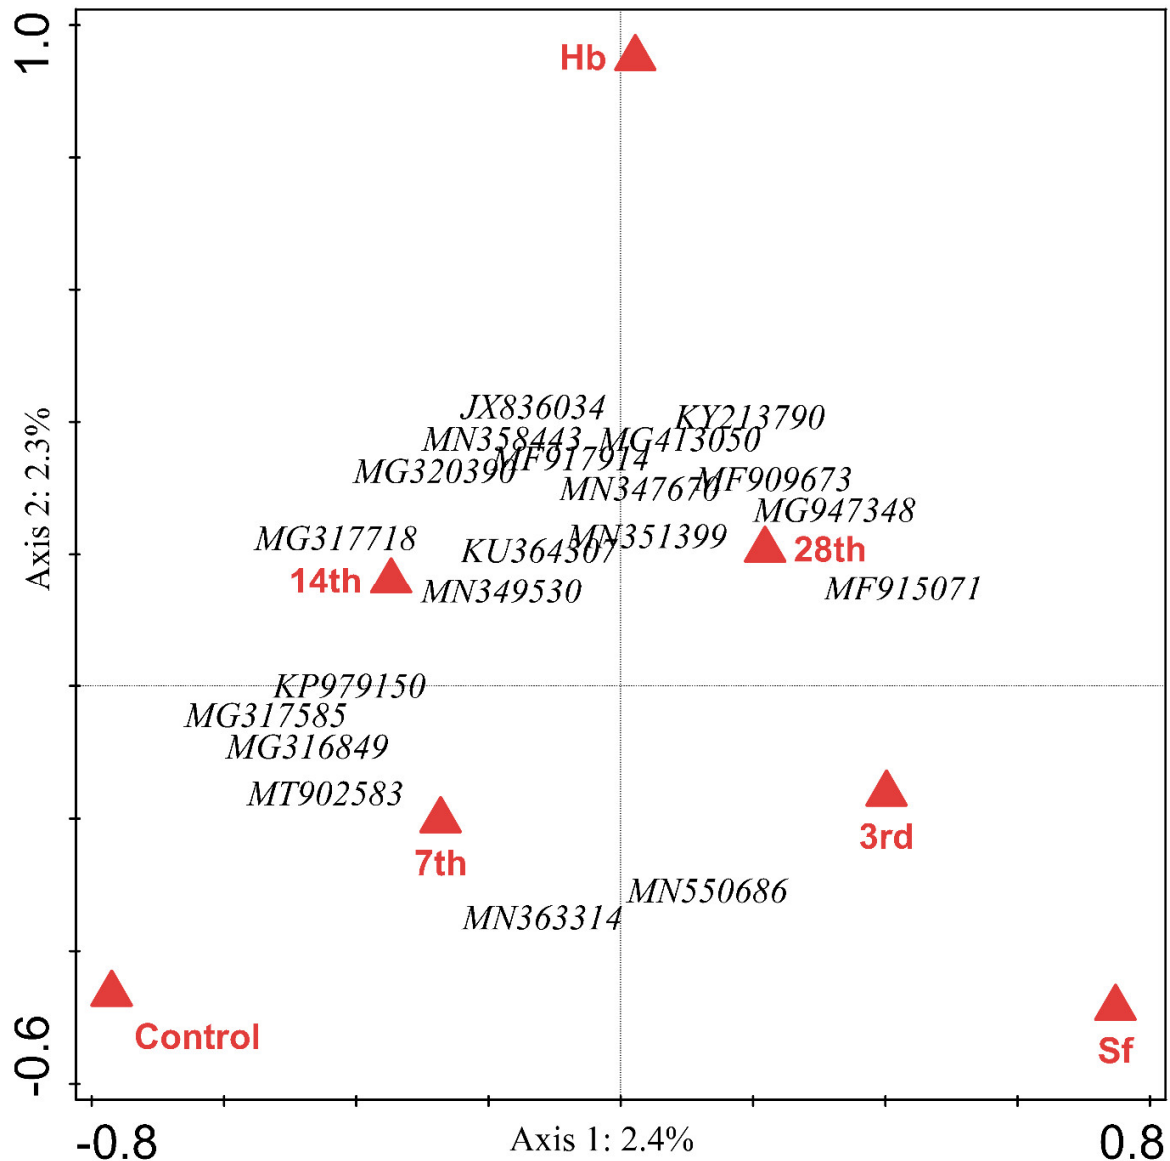

**Figure S1.** redundancy analysis (RDA) showing the response of soil microarthropods (mites, collembola and diplurans) to treatment (*Steinernema feltiae*, Sf; *Heterorhabditis bacteriophora* Hb; control) and timing (3rd, 7th, 14th, 28th day after treatment). All microarthropod MOTUs that occurred on more than 15% of the samples (119) were included in the analysis, and the 20 with the best model fit were presented. Titles are the accession numbers from NCBI database.
