# Supplementary material for: Arthropod Community Responses Reveal Potential Predators and Prey of Entomopathogenic Nematodes in a Citrus Orchard
Source: MDPI journal article supplement (doi:10.3390/agronomy12102502), 2022-10-13
Supplement: s1 [file s1 › supplementary table S1.xlsx]

## Sheet: microarthropods
Accession	description	Kingdom	Phylum	Class	Order	Family	genus	species
AY184371.1	Coleolaelaps sp. DEW-2003 cytochrome c oxidase subunit 1 (cox1) gene, partial cds; mitochondrial gene for mitochondrial product	Metazoa	Arthropoda	Arachnida	Mesostigmata	Laelapidae	Coleolaelaps	NA
GQ373442.1	Entomobryidae sp. DPCOL65918 voucher 2953A02_Sk061510 cytochrome oxidase subunit 1 (COI) gene, partial cds; mitochondrial	Metazoa	Arthropoda	Collembola	Entomobryomorpha	Entomobryidae	NA	NA
GQ373481.1	Entomobryidae sp. DPCOL12495 voucher 1814E04_RU032 cytochrome oxidase subunit 1 (COI) gene, partial cds; mitochondrial	Metazoa	Arthropoda	Collembola	Entomobryomorpha	Entomobryidae	NA	NA
GQ373546.1	Hypogastruridae sp. DPCOL75314 voucher 2955F11_ALPtemp17 cytochrome oxidase subunit 1 (COI) gene, partial cds; mitochondrial	Metazoa	Arthropoda	Collembola	Poduromorpha	Hypogastruridae	NA	NA
GQ374011.1	Onychiuridae sp. DPCOL95864 voucher 2011C06_RU089 cytochrome oxidase subunit 1 (COI) gene, partial cds; mitochondrial	Metazoa	Arthropoda	Collembola	Poduromorpha	Onychiuridae	NA	NA
HM377216.1	Hydryphantes sp. KOWMC070-09 voucher BIOUG<CAN>:09PROBE-02355 cytochrome oxidase subunit 1 (COI) gene, partial cds; mitochondrial	Metazoa	Arthropoda	Arachnida	Trombidiformes	Hydryphantidae	Hydryphantes	NA
HM405835.1	Bdellidae sp. CHACA970-10 voucher BIOUG<CAN>:DPMIT-17-64 cytochrome oxidase subunit 1 (COI) gene, partial cds; mitochondrial	Metazoa	Arthropoda	Arachnida	Trombidiformes	Bdellidae	NA	NA
HM424145.1	Micranurida sp. 1 BOLD-2017 voucher BIOUG<CAN>:CHU06-COL-1042 cytochrome oxidase subunit 1 (COI) gene, partial cds; mitochondrial	Metazoa	Arthropoda	Collembola	Poduromorpha	Neanuridae	Micranurida	NA
HM887567.1	Bdellidae sp. MIONB023-10 voucher BIOUG<CAN>:DPMIT-24-67 cytochrome oxidase subunit 1 (COI) gene, partial cds; mitochondrial	Metazoa	Arthropoda	Arachnida	Trombidiformes	Bdellidae	NA	NA
HM907466.1	Ologamasidae sp. CHACC071-10 voucher BIOUG<CAN>:DPMIT-35-71 cytochrome oxidase subunit 1 (COI) gene, partial cds; mitochondrial	Metazoa	Arthropoda	Arachnida	Mesostigmata	Ologamasidae	NA	NA
HQ558341.1	Rhagidiidae sp. CHACB021-10 voucher BIOUG<CAN>:DPMIT-021-21 cytochrome oxidase subunit 1 (COI) gene, partial cds; mitochondrial	Metazoa	Arthropoda	Arachnida	Trombidiformes	Rhagidiidae	NA	NA
HQ558365.1	Rhagidiidae sp. CHACB056-10 voucher BIOUG<CAN>:DPMIT-021-56 cytochrome oxidase subunit 1 (COI) gene, partial cds; mitochondrial	Metazoa	Arthropoda	Arachnida	Trombidiformes	Rhagidiidae	NA	NA
HQ558383.1	Zerconidae sp. CHACB076-10 voucher BIOUG<CAN>:DPMIT-021-76 cytochrome oxidase subunit 1 (COI) gene, partial cds; mitochondrial	Metazoa	Arthropoda	Arachnida	Mesostigmata	Zerconidae	NA	NA
HQ558489.1	Penthaleidae sp. CHACB244-10 voucher BIOUG<CAN>:DPMIT-23-54 cytochrome oxidase subunit 1 (COI) gene, partial cds; mitochondrial	Metazoa	Arthropoda	Arachnida	Trombidiformes	Penthaleidae	NA	NA
HQ583617.1	Asterocampa leilia voucher BIOUG<CAN>:10BBLEP-01512 cytochrome oxidase subunit 1 (COI) gene, partial cds; mitochondrial	Metazoa	Arthropoda	Arachnida	Sarcoptiformes	Nymphalidae	NA	NA
HQ732028.1	Anurida maritima voucher cpp5 cytochrome oxidase subunit I (COX1) gene, partial cds; mitochondrial	Metazoa	Arthropoda	Collembola	Poduromorpha	Neanuridae	Anurida	Anurida maritima
HQ732078.1	Protaphorura armata voucher O3 cytochrome oxidase subunit I (COX1) gene, partial cds; mitochondrial	Metazoa	Arthropoda	Collembola	Poduromorpha	Onychiuridae	Protaphorura	Protaphorura armata
HQ978924.1	Lepidosira sp. BOLD:AAA7242 voucher BIOUG<CAN>:TDWG-0535 cytochrome oxidase subunit 1 (COI) gene, partial cds; mitochondrial	Metazoa	Arthropoda	Collembola	Entomobryomorpha	Entomobryidae	Lepidosira	NA
JF884258.1	Arrhopalites caecus voucher BIOUG<CAN>:CHU06-COL-0873 cytochrome oxidase subunit 1 (COI) gene, partial cds; mitochondrial	Metazoa	Arthropoda	Collembola	Symphypleona	Arrhopalitidae	Arrhopalites	Arrhopalites caecus
JN018109.1	Torrenticola amplexa voucher MNHN-JAC75 cytochrome oxidase subunit I (COI) gene, partial cds; mitochondrial	Metazoa	Arthropoda	Arachnida	Trombidiformes	Torrenticolidae	Torrenticola	Torrenticola amplexa
JN034751.1	Piona longipalpis voucher NHRS-ACAR 000000060 cytochrome oxidase subunit 1 (COI) gene, partial cds; mitochondrial	Metazoa	Arthropoda	Arachnida	Trombidiformes	Pionidae	Piona	Piona longipalpis
JN275273.1	Entomobryomorpha sp. BOLD:AAU1547 voucher 4028C01_MNECLL2278 cytochrome oxidase subunit 1 (COI) gene, partial cds; mitochondrial	Metazoa	Arthropoda	Collembola	Entomobryomorpha	Entomobryidae	NA	NA
JN970916.1	Megalothorax sp. EA040005-cs3 cytochrome oxidase subunit I (COI) gene, partial cds; mitochondrial	Metazoa	Arthropoda	Collembola	Neelipleona	Neelidae	Megalothorax	NA
JQ796644.1	Parajapyx isabellae voucher SH06009 cytochrome oxidase subunit I (COI) gene, partial cds; mitochondrial	Metazoa	Arthropoda	Entognatha	Diplura	Parajapygidae	Parajapyx	Parajapyx isabellae
JQ796645.1	Parajapyx isabellae voucher SH06010 cytochrome oxidase subunit I (COI) gene, partial cds; mitochondrial	Metazoa	Arthropoda	Entognatha	Diplura	Parajapygidae	Parajapyx	Parajapyx isabellae
JQ796647.1	Parajapyx isabellae voucher SH06012 cytochrome oxidase subunit I (COI) gene, partial cds; mitochondrial	Metazoa	Arthropoda	Entognatha	Diplura	Parajapygidae	Parajapyx	Parajapyx isabellae
JX573136.1	Haemaphysalis parva mitochondrion, complete genome	Metazoa	Arthropoda	Arachnida	Ixodida	Ixodidae	Haemaphysalis	Haemaphysalis parva
JX833660.1	Trombidiformes sp. BOLD:ABV1854 voucher BIOUG01181-04 cytochrome oxidase subunit 1 (COI) gene, partial cds; mitochondrial	Metazoa	Arthropoda	Arachnida	Trombidiformes	Trombidiformes sp.	NA	NA
JX833754.1	Rhagidiidae sp. BOLD:AAZ5873 voucher CCDB-07422-05 cytochrome oxidase subunit 1 (COI) gene, partial cds; mitochondrial	Metazoa	Arthropoda	Arachnida	Trombidiformes	Rhagidiidae	NA	NA
JX833786.1	Brachychthoniidae sp. BOLD:AAU6072 voucher MYMCA-03-42 cytochrome oxidase subunit 1 (COI) gene, partial cds; mitochondrial	Metazoa	Arthropoda	Arachnida	Sarcoptiformes	Brachychthoniidae	NA	NA
JX833901.1	Nanorchestes sp. BOLD:AAL7948 voucher BIOUG01185-10 cytochrome oxidase subunit 1 (COI) gene, partial cds; mitochondrial	Metazoa	Arthropoda	Arachnida	Sarcoptiformes	Nanorchestidae	Nanorchestes	NA
JX833913.1	Zschokkea sp. BOLD:AAH8368 voucher MYMCA-01-49 cytochrome oxidase subunit 1 (COI) gene, partial cds; mitochondrial	Metazoa	Arthropoda	Arachnida	Trombidiformes	Thyasidae	Zschokkea	NA
JX834085.1	Tarsonemidae sp. BOLD:AAU6269 voucher MYMCA-07-48 cytochrome oxidase subunit 1 (COI) gene, partial cds; mitochondrial	Metazoa	Arthropoda	Arachnida	Trombidiformes	Tarsonemidae	NA	NA
JX834096.1	Melicharidae sp. BOLD:AAZ4186 voucher BIOUG01066-19 cytochrome oxidase subunit 1 (COI) gene, partial cds; mitochondrial	Metazoa	Arthropoda	Arachnida	Mesostigmata	Melicharidae	NA	NA
JX834187.1	Tectocepheus sp. MYMCE181-12 voucher BIOUG01178-86 cytochrome oxidase subunit 1 (COI) gene, partial cds; mitochondrial	Metazoa	Arthropoda	Arachnida	Sarcoptiformes	Tectocepheidae	Tectocepheus	NA
JX834200.1	Trombidiformes sp. BOLD:AAZ4411 voucher BIOUG01066-35 cytochrome oxidase subunit 1 (COI) gene, partial cds; mitochondrial	Metazoa	Arthropoda	Arachnida	Trombidiformes	Trombidiformes sp.	NA	NA
JX834384.1	Trombidiformes sp. BOLD:AAU6275 voucher MYMCA-04-74 cytochrome oxidase subunit 1 (COI) gene, partial cds; mitochondrial	Metazoa	Arthropoda	Arachnida	Trombidiformes	Trombidiformes sp.	NA	NA
JX834495.1	Rhagidiidae sp. BOLD:AAL7943 voucher CCDB-07432-56 cytochrome oxidase subunit 1 (COI) gene, partial cds; mitochondrial	Metazoa	Arthropoda	Arachnida	Trombidiformes	Rhagidiidae	NA	NA
JX834523.1	Tarsonemidae sp. BOLD:AAZ4419 voucher BIOUG01073-76 cytochrome oxidase subunit 1 (COI) gene, partial cds; mitochondrial	Metazoa	Arthropoda	Arachnida	Trombidiformes	Tarsonemidae	NA	NA
JX834615.1	Trombidiformes sp. BOLD:ABV1811 voucher BIOUG01177-13 cytochrome oxidase subunit 1 (COI) gene, partial cds; mitochondrial	Metazoa	Arthropoda	Arachnida	Trombidiformes	Trombidiformes sp.	NA	NA
JX834798.1	Tydeidae sp. BOLD:AAU6271 voucher BIOUG01098-65 cytochrome oxidase subunit 1 (COI) gene, partial cds; mitochondrial	Metazoa	Arthropoda	Arachnida	Trombidiformes	Tydeidae	NA	NA
JX834907.1	Tarsonemidae sp. BOLD:ABV3256 voucher BIOUG01938-94 cytochrome oxidase subunit 1 (COI) gene, partial cds; mitochondrial	Metazoa	Arthropoda	Arachnida	Trombidiformes	Tarsonemidae	NA	NA
JX835048.1	Oribatella sp. BOLD:ABV2866 voucher BIOUG01179-45 cytochrome oxidase subunit 1 (COI) gene, partial cds; mitochondrial	Metazoa	Arthropoda	Arachnida	Sarcoptiformes	Oribatellidae	Oribatella	NA
JX835090.1	Tarsonemidae sp. BOLD:ABV3249 voucher BIOUG01942-11 cytochrome oxidase subunit 1 (COI) gene, partial cds; mitochondrial	Metazoa	Arthropoda	Arachnida	Trombidiformes	Tarsonemidae	NA	NA
JX835160.1	Trombidiformes sp. BOLD:ABZ0007 voucher BIOUG01177-12 cytochrome oxidase subunit 1 (COI) gene, partial cds; mitochondrial	Metazoa	Arthropoda	Arachnida	Trombidiformes	Trombidiformes sp.	NA	NA
JX835339.1	Rhagidiidae sp. MYMCE391-12 voucher BIOUG01181-11 cytochrome oxidase subunit 1 (COI) gene, partial cds; mitochondrial	Metazoa	Arthropoda	Arachnida	Trombidiformes	Rhagidiidae	NA	NA
JX835422.1	Trombidiformes sp. BOLD:ABX8935 voucher CCDB-07430-33 cytochrome oxidase subunit 1 (COI) gene, partial cds; mitochondrial	Metazoa	Arthropoda	Arachnida	Trombidiformes	Trombidiformes sp.	NA	NA
JX835567.1	Anachipteria howardi voucher BIOUG01179-48 cytochrome oxidase subunit 1 (COI) gene, partial cds; mitochondrial	Metazoa	Arthropoda	Arachnida	Sarcoptiformes	Achipteriidae	Anachipteria	Anachipteria howardi
JX835670.1	Oppiidae sp. BOLD:AAU6067 voucher BIOUG01066-17 cytochrome oxidase subunit 1 (COI) gene, partial cds; mitochondrial	Metazoa	Arthropoda	Arachnida	Sarcoptiformes	Oppiidae	NA	NA
JX835739.1	Oribatella sp. BOLD:AAB3348 voucher 08DPMIT-0209 cytochrome oxidase subunit 1 (COI) gene, partial cds; mitochondrial	Metazoa	Arthropoda	Arachnida	Sarcoptiformes	Oribatellidae	Oribatella	NA
JX835920.1	Rhagidiidae sp. BOLD:ABV1808 voucher BIOUG01187-08 cytochrome oxidase subunit 1 (COI) gene, partial cds; mitochondrial	Metazoa	Arthropoda	Arachnida	Trombidiformes	Rhagidiidae	NA	NA
JX835961.1	Oppiidae sp. BOLD:AAF9215 voucher CCDB-07422-95 cytochrome oxidase subunit 1 (COI) gene, partial cds; mitochondrial	Metazoa	Arthropoda	Arachnida	Sarcoptiformes	Oppiidae	NA	NA
JX836031.1	Rhagidiidae sp. BOLD:AAF9283 voucher BIOUG01181-38 cytochrome oxidase subunit 1 (COI) gene, partial cds; mitochondrial	Metazoa	Arthropoda	Arachnida	Trombidiformes	Rhagidiidae	NA	NA
JX836034.1	Oppiidae sp. MYMCC093-11 voucher BIOUG01067-93 cytochrome oxidase subunit 1 (COI) gene, partial cds; mitochondrial	Metazoa	Arthropoda	Arachnida	Sarcoptiformes	Oppiidae	NA	NA
JX836238.1	Tarsonemidae sp. BOLD:ABV3259 voucher BIOUG01940-56 cytochrome oxidase subunit 1 (COI) gene, partial cds; mitochondrial	Metazoa	Arthropoda	Arachnida	Trombidiformes	Tarsonemidae	NA	NA
JX836346.1	Phytoseiidae sp. BOLD:AAL8172 voucher CCDB-07438-82 cytochrome oxidase subunit 1 (COI) gene, partial cds; mitochondrial	Metazoa	Arthropoda	Arachnida	Mesostigmata	Phytoseiidae	NA	NA
JX836614.1	Nanorchestes sp. MYMCD007-11 voucher BIOUG01099-07 cytochrome oxidase subunit 1 (COI) gene, partial cds; mitochondrial	Metazoa	Arthropoda	Arachnida	Sarcoptiformes	Nanorchestidae	Nanorchestes	NA
JX836713.1	Trombidiformes sp. BOLD:ABV1811 voucher BIOUG01177-31 cytochrome oxidase subunit 1 (COI) gene, partial cds; mitochondrial	Metazoa	Arthropoda	Arachnida	Trombidiformes	Trombidiformes sp.	NA	NA
JX836824.1	Suctobelbella sp. BOLD:AAU6074 voucher MYMCA-05-58 cytochrome oxidase subunit 1 (COI) gene, partial cds; mitochondrial	Metazoa	Arthropoda	Arachnida	Sarcoptiformes	Suctobelbidae	Suctobelbella	NA
JX837126.1	Trombidiformes sp. BOLD:ABV1822 voucher BIOUG01941-78 cytochrome oxidase subunit 1 (COI) gene, partial cds; mitochondrial	Metazoa	Arthropoda	Arachnida	Trombidiformes	Trombidiformes sp.	NA	NA
JX837232.1	Brachychthoniidae sp. BOLD:ABV0382 voucher BIOUG01192-55 cytochrome oxidase subunit 1 (COI) gene, partial cds; mitochondrial	Metazoa	Arthropoda	Arachnida	Sarcoptiformes	Brachychthoniidae	NA	NA
JX837357.1	Trombidiformes sp. BOLD:AAL8147 voucher CCDB-07431-22 cytochrome oxidase subunit 1 (COI) gene, partial cds; mitochondrial	Metazoa	Arthropoda	Arachnida	Trombidiformes	Trombidiformes sp.	NA	NA
JX837563.1	Ameroseiidae sp. BOLD:AAF9107 voucher 08DPMIT-0517 cytochrome oxidase subunit 1 (COI) gene, partial cds; mitochondrial	Metazoa	Arthropoda	Arachnida	Mesostigmata	Ameroseiidae	NA	NA
JX837593.1	Brachychthoniidae sp. BOLD:AAZ6649 voucher CCDB-07420-07 cytochrome oxidase subunit 1 (COI) gene, partial cds; mitochondrial	Metazoa	Arthropoda	Arachnida	Sarcoptiformes	Brachychthoniidae	NA	NA
JX837854.1	Rhagidiidae sp. BOLD:AAZ5872 voucher BIOUG01183-12 cytochrome oxidase subunit 1 (COI) gene, partial cds; mitochondrial	Metazoa	Arthropoda	Arachnida	Trombidiformes	Rhagidiidae	NA	NA
JX837905.1	Malaconothrus mollisetosus voucher DMPIT-30-48 cytochrome oxidase subunit 1 (COI) gene, partial cds; mitochondrial	Metazoa	Arthropoda	Arachnida	Sarcoptiformes	Malaconothridae	Malaconothrus	Malaconothrus mollisetosus
JX837907.1	Oppiidae sp. BOLD:AAU6068 voucher MYMCA-04-72 cytochrome oxidase subunit 1 (COI) gene, partial cds; mitochondrial	Metazoa	Arthropoda	Arachnida	Sarcoptiformes	Oppiidae	NA	NA
JX837933.1	Brachychthoniidae sp. BOLD:ABV0375 voucher BIOUG01192-58 cytochrome oxidase subunit 1 (COI) gene, partial cds; mitochondrial	Metazoa	Arthropoda	Arachnida	Sarcoptiformes	Brachychthoniidae	NA	NA
JX838024.1	Trombidiformes sp. MYMCF219-12 voucher BIOUG01189-29 cytochrome oxidase subunit 1 (COI) gene, partial cds; mitochondrial	Metazoa	Arthropoda	Arachnida	Trombidiformes	Trombidiformes sp.	NA	NA
JX838137.1	Tydeidae sp. BOLD:AAF9212 voucher CCDB-07433-06 cytochrome oxidase subunit 1 (COI) gene, partial cds; mitochondrial	Metazoa	Arthropoda	Arachnida	Trombidiformes	Tydeidae	NA	NA
JX838240.1	Trombidiformes sp. BOLD:AAL8170 voucher CCDB-07431-30 cytochrome oxidase subunit 1 (COI) gene, partial cds; mitochondrial	Metazoa	Arthropoda	Arachnida	Trombidiformes	Trombidiformes sp.	NA	NA
JX838451.1	Rhagidiidae sp. BOLD:ABV1812 voucher BIOUG01938-89 cytochrome oxidase subunit 1 (COI) gene, partial cds; mitochondrial	Metazoa	Arthropoda	Arachnida	Trombidiformes	Rhagidiidae	NA	NA
JX838495.1	Trombidiformes sp. BOLD:AAZ4420 voucher BIOUG01073-79 cytochrome oxidase subunit 1 (COI) gene, partial cds; mitochondrial	Metazoa	Arthropoda	Arachnida	Trombidiformes	Trombidiformes sp.	NA	NA
JX838551.1	Rhagidiidae sp. BOLD:AAZ6641 voucher BIOUG01099-54 cytochrome oxidase subunit 1 (COI) gene, partial cds; mitochondrial	Metazoa	Arthropoda	Arachnida	Trombidiformes	Rhagidiidae	NA	NA
JX838654.1	Cyta sp. BOLD:AAH6606 voucher BIOUG01098-91 cytochrome oxidase subunit 1 (COI) gene, partial cds; mitochondrial	Metazoa	Arthropoda	Arachnida	Trombidiformes	Bdellidae	Cyta	NA
JX838745.1	Brachychthoniidae sp. BOLD:ABV0380 voucher BIOUG01190-95 cytochrome oxidase subunit 1 (COI) gene, partial cds; mitochondrial	Metazoa	Arthropoda	Arachnida	Sarcoptiformes	Brachychthoniidae	NA	NA
JX838778.1	Brachychthoniidae sp. BOLD:ABV0375 voucher BIOUG01942-88 cytochrome oxidase subunit 1 (COI) gene, partial cds; mitochondrial	Metazoa	Arthropoda	Arachnida	Sarcoptiformes	Brachychthoniidae	NA	NA
JX891545.1	Steganacarus applicatus voucher AMUAA537 cytochrome oxidase subunit I (COI) gene, partial cds; mitochondrial	Metazoa	Arthropoda	Arachnida	Sarcoptiformes	Steganacaridae	Steganacarus	Steganacarus applicatus
KC412849.1	Aceria tosichella isolate WCM490 cytochrome oxidase subunit I gene, partial cds; mitochondrial	Metazoa	Arthropoda	Arachnida	Trombidiformes	Eriophyidae	Aceria	Aceria tosichella
KC769596.1	Ornithodoros savignyi mitochondrion, partial genome	Metazoa	Arthropoda	Arachnida	Ixodida	Argasidae	Ornithodoros	Ornithodoros savignyi
KC900199.1	Megalothorax nigropunctatus voucher cs119 cytochrome oxidase subunit I (COI) gene, partial cds; mitochondrial	Metazoa	Arthropoda	Collembola	Neelipleona	Neelidae	Megalothorax	Megalothorax nigropunctatus
KF293423.1	Oppiella nova isolate KW_F_031 cytochrome c oxidase subunit I (COI) gene, partial cds; mitochondrial	Metazoa	Arthropoda	Arachnida	Sarcoptiformes	Oppiidae	Oppiella	Oppiella nova
KF293512.1	Berniniella hauseri isolate 2 cytochrome c oxidase subunit I (COI) gene, partial cds; mitochondrial	Metazoa	Arthropoda	Arachnida	Sarcoptiformes	Oppiidae	Berniniella	Berniniella hauseri
KF642015.1	Folsomia quadrioculata L2 voucher CHU06-COL-0201 cytochrome oxidase subunit 1 (COI) gene, partial cds; mitochondrial	Metazoa	Arthropoda	Collembola	Entomobryomorpha	Isotomidae	Folsomia	Folsomia quadrioculata L2
KF642333.1	Proisotoma sp. 3 DP-2013 voucher CHU06-COL-0028 cytochrome oxidase subunit 1 (COI) gene, partial cds; mitochondrial	Metazoa	Arthropoda	Collembola	Entomobryomorpha	Isotomidae	Proisotoma	NA
KF703732.1	Thalassaphorura sp. YB-2013 voucher L60 cytochrome oxidase subunit I (COI) gene, partial cds; mitochondrial	Metazoa	Arthropoda	Collembola	Poduromorpha	Onychiuridae	Thalassaphorura	NA
KF703734.1	Thalassaphorura sp. YB-2013 voucher L64 cytochrome oxidase subunit I (COI) gene, partial cds; mitochondrial	Metazoa	Arthropoda	Collembola	Poduromorpha	Onychiuridae	Thalassaphorura	NA
KF891931.1	Echimytricalges guyanensis isolate AD572 cytochrome oxidase subunit I (COXI) gene, partial cds; mitochondrial	Metazoa	Arthropoda	Arachnida	Sarcoptiformes	Lobalgidae	Echimytricalges	Echimytricalges guyanensis
KF891934.1	Caparinia sp. AD1647 cytochrome oxidase subunit I (COXI) gene, partial cds; mitochondrial	Metazoa	Arthropoda	Arachnida	Sarcoptiformes	Psoroptidae	Caparinia	NA
KF891936.1	Chorioptes sweatmani isolate AD1664 cytochrome oxidase subunit I (COXI) gene, partial cds; mitochondrial	Metazoa	Arthropoda	Arachnida	Sarcoptiformes	Psoroptidae	Chorioptes	Chorioptes sweatmani
KF966634.1	Neoseiulus womersleyi voucher Mite039 cytochrome c oxidase subunit 1 (COI) gene, partial cds; mitochondrial	Metazoa	Arthropoda	Arachnida	Mesostigmata	Phytoseiidae	Neoseiulus	Neoseiulus womersleyi
KF966659.1	Penthaleidae sp. Q091 voucher 20090209-5 cytochrome c oxidase subunit 1 (COI) gene, partial cds; mitochondrial	Metazoa	Arthropoda	Arachnida	Trombidiformes	Penthaleidae	NA	NA
KJ186349.1	Folsomia quadrioculata isolate MK_Fq5 cytochrome oxidase subunit I (COI) gene, partial cds; mitochondrial	Metazoa	Arthropoda	Collembola	Entomobryomorpha	Isotomidae	Folsomia	Folsomia quadrioculata
KJ444554.1	Tydeidae sp. BOLD:ACC0867 voucher BIOUG03765-G04 cytochrome oxidase subunit 1 (COI) gene, partial cds; mitochondrial	Metazoa	Arthropoda	Arachnida	Trombidiformes	Tydeidae	NA	NA
KJ781699.1	Homidia phjongjangica isolate SAX_6 pop-variant C9667_2 cytochrome oxidase subunit 1 (COI) gene, partial cds; mitochondrial	Metazoa	Arthropoda	Collembola	Entomobryomorpha	Entomobryidae	Homidia	Homidia phjongjangica
KJ781714.1	Homidia cf. latifolia 9643 isolate ZJ_5 pop-variant C9643_2 cytochrome oxidase subunit 1 (COI) gene, partial cds; mitochondrial	Metazoa	Arthropoda	Collembola	Entomobryomorpha	Entomobryidae	Homidia	Homidia cf. latifolia 9643
KJ873667.1	Homidia sp. 2 FZ-2014 isolate SAXZQ_4 pop-variant C9683_sp2 cytochrome oxidase subunit I (COI) gene, partial cds; mitochondrial	Metazoa	Arthropoda	Collembola	Entomobryomorpha	Entomobryidae	Homidia	NA
KJ873866.1	Homidia pseudosinensis isolate FJFZ_3 pop-variant 4177_pseudosinensis cytochrome oxidase subunit I (COI) gene, partial cds; mitochondrial	Metazoa	Arthropoda	Collembola	Entomobryomorpha	Entomobryidae	Homidia	Homidia pseudosinensis
KM114225.1	Demodex brevis mitochondrion, complete genome	Metazoa	Arthropoda	Arachnida	Trombidiformes	Demodicidae	Demodex	Demodex brevis
KM497433.1	Ixodes granulatus strain 112-2 cytochrome c oxidase subunit I (COI) gene, partial cds; mitochondrial	Metazoa	Arthropoda	Arachnida	Ixodida	Ixodidae	Ixodes	Ixodes granulatus
KM610104.1	Entomobrya neotenica voucher 12-2-yt-1 cytochrome oxidase subunit 1 (COI) gene, partial cds; mitochondrial	Metazoa	Arthropoda	Collembola	Entomobryomorpha	Entomobryidae	Entomobrya	Entomobrya neotenica
KM622792.1	Hypogastruridae sp. BOLD:ACE1775 voucher BIOUG04872-B04 cytochrome oxidase subunit 1 (COI) gene, partial cds; mitochondrial	Metazoa	Arthropoda	Collembola	Poduromorpha	Hypogastruridae	NA	NA
KM623317.1	Sarcoptiformes sp. BOLD:ACD9111 voucher BIOUG04145-B07 cytochrome oxidase subunit 1 (COI) gene, partial cds; mitochondrial	Metazoa	Arthropoda	Arachnida	Sarcoptiformes	Sarcoptiformes sp.	NA	NA
KM824089.1	Cepheidae sp. BOLD:ACE1715 voucher BIOUG04534-E07 cytochrome oxidase subunit 1 (COI) gene, partial cds; mitochondrial	Metazoa	Arthropoda	Arachnida	Sarcoptiformes	Cepheidae	NA	NA
KM828201.1	Sarcoptiformes sp. BOLD:ACD8996 voucher BIOUG04308-F10 cytochrome oxidase subunit 1 (COI) gene, partial cds; mitochondrial	Metazoa	Arthropoda	Arachnida	Sarcoptiformes	Sarcoptiformes sp.	NA	NA
KM828992.1	Scheloribatidae sp. BOLD:ACE1257 voucher BIOUG04450-A05 cytochrome oxidase subunit 1 (COI) gene, partial cds; mitochondrial	Metazoa	Arthropoda	Arachnida	Sarcoptiformes	Scheloribatidae	NA	NA
KM831555.1	Ereynetidae sp. BOLD:ACE1325 voucher BIOUG03708-D02 cytochrome oxidase subunit 1 (COI) gene, partial cds; mitochondrial	Metazoa	Arthropoda	Arachnida	Trombidiformes	Ereynetidae	NA	NA
KM831606.1	Rhagidiidae sp. BOLD:ACC1019 voucher BIOUG03813-F06 cytochrome oxidase subunit 1 (COI) gene, partial cds; mitochondrial	Metazoa	Arthropoda	Arachnida	Trombidiformes	Rhagidiidae	NA	NA
KM833068.1	Suctobelbidae sp. BOLD:ACI7601 voucher BIOUG06792-H08 cytochrome oxidase subunit 1 (COI) gene, partial cds; mitochondrial	Metazoa	Arthropoda	Arachnida	Sarcoptiformes	Suctobelbidae	NA	NA
KM834556.1	Sarcoptiformes sp. BOLD:ACD9114 voucher BIOUG04308-B09 cytochrome oxidase subunit 1 (COI) gene, partial cds; mitochondrial	Metazoa	Arthropoda	Arachnida	Sarcoptiformes	Sarcoptiformes sp.	NA	NA
KM836960.1	Peloribates pilosus voucher BIOUG06792-G10 cytochrome oxidase subunit 1 (COI) gene, partial cds; mitochondrial	Metazoa	Arthropoda	Arachnida	Sarcoptiformes	Haplozetidae	Peloribates	Peloribates pilosus
KM840597.1	Jugatala sp. BOLD:ACC8986 voucher BIOUG05768-G09 cytochrome oxidase subunit 1 (COI) gene, partial cds; mitochondrial	Metazoa	Arthropoda	Arachnida	Sarcoptiformes	Ceratozetidae	Jugatala	NA
KM978371.1	Seira sp. BXW-2014 isolate 1 cytochrome oxidase subunit I (COI) gene, partial cds; mitochondrial	Metazoa	Arthropoda	Collembola	Entomobryomorpha	Seiridae	Seira	NA
KP406751.1	Onychalges pachyspathus voucher UMMZ BMOC 10-0503-003 AD1419 cytochrome oxidase subunit I (COX1) gene, partial cds; mitochondrial	Metazoa	Arthropoda	Arachnida	Sarcoptiformes	Pyroglyphidae	Onychalges	Onychalges pachyspathus
KP979150.1	Nothrus sp. BOLD:AAN6661 voucher DPMIT-40-08 cytochrome oxidase subunit 1 (COI) gene, partial cds; mitochondrial	Metazoa	Arthropoda	Arachnida	Sarcoptiformes	Nothridae	Nothrus	NA
KP979175.1	Scheloribatidae sp. BOLD:AAM8033 voucher DPMIT-38-60 cytochrome oxidase subunit 1 (COI) gene, partial cds; mitochondrial	Metazoa	Arthropoda	Arachnida	Sarcoptiformes	Scheloribatidae	NA	NA
KP979248.1	Mochlozetidae sp. BOLD:ABA5549 voucher BIOUG01654-H06 cytochrome oxidase subunit 1 (COI) gene, partial cds; mitochondrial	Metazoa	Arthropoda	Arachnida	Sarcoptiformes	Mochlozetidae	NA	NA
KR018533.1	Typhloseiulus calabriae haplotype 5 cytochrome oxidase subunit I (COI) gene, partial cds; mitochondrial	Metazoa	Arthropoda	Arachnida	Mesostigmata	Phytoseiidae	Typhloseiulus	Typhloseiulus calabriae
KR018557.1	Typhloseiulus rodopiensis haplotype 17 cytochrome oxidase subunit I (COI) gene, partial cds; mitochondrial	Metazoa	Arthropoda	Arachnida	Mesostigmata	Phytoseiidae	Typhloseiulus	Typhloseiulus rodopiensis
KR069522.1	Paratennulidae sp. BOLD:AAN6691 voucher DPMIT-41-71 cytochrome oxidase subunit 1 (COI) gene, partial cds; mitochondrial	Metazoa	Arthropoda	Arachnida	Mesostigmata	Paratennulidae	NA	NA
KR069597.1	Malaconothridae sp. BOLD:AAZ5799 voucher CCDB-07429-63 cytochrome oxidase subunit 1 (COI) gene, partial cds; mitochondrial	Metazoa	Arthropoda	Arachnida	Sarcoptiformes	Malaconothridae	NA	NA
KR070264.1	Eupodidae sp. BOLD:ACI9911 voucher BIOUG08018-H11 cytochrome oxidase subunit 1 (COI) gene, partial cds; mitochondrial	Metazoa	Arthropoda	Arachnida	Trombidiformes	Eupodidae	NA	NA
KR103675.1	Sarcoptiformes sp. BOLD:ACM3710 voucher BIOUG12267-G03 cytochrome oxidase subunit 1 (COI) gene, partial cds; mitochondrial	Metazoa	Arthropoda	Arachnida	Sarcoptiformes	Sarcoptiformes sp.	NA	NA
KR902767.1	Ixodes ariadnae genotype Ban Vin cytochrome oxidase subunit I (COI) gene, partial cds; mitochondrial	Metazoa	Arthropoda	Arachnida	Ixodida	Ixodidae	Ixodes	Ixodes ariadnae
KT070245.1	Oziella liroi isolate F7 cytochrome oxidase subunit I (COI) gene, partial cds; mitochondrial	Metazoa	Arthropoda	Arachnida	Trombidiformes	Phytoptidae	Oziella	Oziella liroi
KT614909.1	Sarcoptiformes sp. BOLD:ACV4851 voucher BIOUG21899-D07 cytochrome oxidase subunit 1 (COI) gene, partial cds; mitochondrial	Metazoa	Arthropoda	Arachnida	Sarcoptiformes	Sarcoptiformes sp.	NA	NA
KT705457.1	Laelapidae sp. BOLD:ACW5098 voucher BIOUG24030-C11 cytochrome oxidase subunit 1 (COI) gene, partial cds; mitochondrial	Metazoa	Arthropoda	Arachnida	Mesostigmata	Laelapidae	NA	NA
KT799636.1	Mesaphorura yosii cytochrome oxidase subunit I (COI) gene, partial cds; mitochondrial	Metazoa	Arthropoda	Collembola	Poduromorpha	Tullbergiidae	Mesaphorura	Mesaphorura yosii
KU166731.1	Laelaps muricola isolate RPM8.10 cytochrome oxidase subunit I (COI) gene, partial cds; mitochondrial	Metazoa	Arthropoda	Arachnida	Mesostigmata	Laelapidae	Laelaps	Laelaps muricola
KU166734.1	Laelaps muricola isolate VHM4.6 cytochrome oxidase subunit I (COI) gene, partial cds; mitochondrial	Metazoa	Arthropoda	Arachnida	Mesostigmata	Laelapidae	Laelaps	Laelaps muricola
KU203117.1	Proctophyllodes sp. UMMZ BMOC 03-0831-023 AD638 cytochrome oxidase subunit I (COX1) gene, partial cds; mitochondrial	Metazoa	Arthropoda	Arachnida	Sarcoptiformes	Proctophyllodidae	Proctophyllodes	NA
KU203146.1	Proctophyllodes sp. UMMZ BMOC 08-0515-149 AD1198 cytochrome oxidase subunit I (COX1) gene, partial cds; mitochondrial	Metazoa	Arthropoda	Arachnida	Sarcoptiformes	Proctophyllodidae	Proctophyllodes	NA
KU203147.1	Proctophyllodes longiphyllus voucher UMMZ BMOC 07-0703-002 AD912 cytochrome oxidase subunit I (COX1) gene, partial cds; mitochondrial	Metazoa	Arthropoda	Arachnida	Sarcoptiformes	Proctophyllodidae	Proctophyllodes	Proctophyllodes longiphyllus
KU203203.1	Proctophyllodes mesocaulus voucher UMMZ BMOC 13-0810-001 AD1654 cytochrome oxidase subunit I (COX1) gene, partial cds; mitochondrial	Metazoa	Arthropoda	Arachnida	Sarcoptiformes	Proctophyllodidae	Proctophyllodes	Proctophyllodes mesocaulus
KU203236.1	Toxerodectes sp. UMMZ BMOC 08-0515-066 AD1145 cytochrome oxidase subunit I (COX1) gene, partial cds; mitochondrial	Metazoa	Arthropoda	Arachnida	Sarcoptiformes	Proctophyllodidae	Toxerodectes	NA
KU364307.1	Rhipicephalus sanguineus isolate ALSK035 cytochrome c oxidase subunit I gene, partial cds; mitochondrial	Metazoa	Arthropoda	Arachnida	Ixodida	Ixodidae	Rhipicephalus	Rhipicephalus sanguineus
KU508214.1	Protaphorura sp. LD_11_061_1 cytochrome oxidase subunit I (COI) gene, partial cds; mitochondrial	Metazoa	Arthropoda	Collembola	Poduromorpha	Onychiuridae	Protaphorura	NA
KU508232.1	Protaphorura genheensis isolate YTLHHJD_10 cytochrome oxidase subunit I (COI) gene, partial cds; mitochondrial	Metazoa	Arthropoda	Collembola	Poduromorpha	Onychiuridae	Protaphorura	Protaphorura genheensis
KU508240.1	Protaphorura genheensis isolate YTLHHJD_9 cytochrome oxidase subunit I (COI) gene, partial cds; mitochondrial	Metazoa	Arthropoda	Collembola	Poduromorpha	Onychiuridae	Protaphorura	Protaphorura genheensis
KU709969.1	Phalacrodectes gaudi voucher 202_09_A01_JM_M cytochrome c oxidase subunit I (COI) gene, partial cds; mitochondrial	Metazoa	Arthropoda	Arachnida	Sarcoptiformes	Hypoderatidae	Phalacrodectes	Phalacrodectes gaudi
KU865160.1	Lohmanniidae sp. BMNH-1424150 cytochrome oxidase subunit 1 (cox1) gene, partial cds; mitochondrial	Metazoa	Arthropoda	Arachnida	Sarcoptiformes	Lohmanniidae	NA	NA
KX452726.1	Histiostoma blomquisti mitochondrion, complete genome	Metazoa	Arthropoda	Arachnida	Sarcoptiformes	Histiostomatidae	Histiostoma	Histiostoma blomquisti
KX712088.1	Nothoaspis amazoniensis mitochondrion, complete genome	Metazoa	Arthropoda	Arachnida	Ixodida	Argasidae	Nothoaspis	Nothoaspis amazoniensis
KY213790.1	Ixodes cornuatus isolate S18 cytochrome oxidase subunit I (COX1) gene, partial cds; mitochondrial	Metazoa	Arthropoda	Arachnida	Ixodida	Ixodidae	Ixodes	Ixodes cornuatus
KY503120.1	Oribatellidae sp. CJ_1658_013_Otokiki cytochrome oxidase subunit I (COI) gene, partial cds; mitochondrial	Metazoa	Arthropoda	Arachnida	Sarcoptiformes	Oribatellidae	NA	NA
KY503135.1	Eremaeidae sp. CJ_1676_049_Otokiki cytochrome oxidase subunit I (COI) gene, partial cds; mitochondrial	Metazoa	Arthropoda	Arachnida	Sarcoptiformes	Eremaeidae	NA	NA
KY503144.1	Scheloribatidae sp. CJ_1687_025_Otokiki cytochrome oxidase subunit I (COI) gene, partial cds; mitochondrial	Metazoa	Arthropoda	Arachnida	Sarcoptiformes	Scheloribatidae	NA	NA
KY922356.1	Nanorchestes sp. AD1089 voucher UMMZ BMOC 07-0615-010 AD1089 cytochrome oxidase subunit I (COXI) gene, partial cds; mitochondrial	Metazoa	Arthropoda	Arachnida	Sarcoptiformes	Nanorchestidae	Nanorchestes	NA
KY922358.1	Bimichaelia sp. AD1217 voucher UMMZ BMOC 08-0515-049 AD1217 cytochrome oxidase subunit I (COXI) gene, partial cds; mitochondrial	Metazoa	Arthropoda	Arachnida	Sarcoptiformes	Alycidae	Bimichaelia	NA
KY922359.1	Bimichaelia sp. AD1331 voucher UMMZ BMOC 08-0901-013 AD1331 cytochrome oxidase subunit I (COXI) gene, partial cds; mitochondrial	Metazoa	Arthropoda	Arachnida	Sarcoptiformes	Alycidae	Bimichaelia	NA
KY922383.1	Stigmalychus sp. 1 PBK-2017 voucher UMMZ BMOC 08-0901-012 AD1318 cytochrome oxidase subunit I (COXI) gene, partial cds; mitochondrial	Metazoa	Arthropoda	Arachnida	Sarcoptiformes	Alicorhagiidae	Stigmalychus	NA
KY922383.2	Stigmalychus sp. 1 PBK-2017 voucher UMMZ BMOC 08-0901-012 AD1318 cytochrome oxidase subunit I (COXI) gene, partial cds; mitochondrial	Metazoa	Arthropoda	Arachnida	Sarcoptiformes	Alicorhagiidae	Stigmalychus	NA
KY922383.3	Stigmalychus sp. 1 PBK-2017 voucher UMMZ BMOC 08-0901-012 AD1318 cytochrome oxidase subunit I (COXI) gene, partial cds; mitochondrial	Metazoa	Arthropoda	Arachnida	Sarcoptiformes	Alicorhagiidae	Stigmalychus	NA
KY922384.1	Stigmalychus sp. 2 PBK-2017 voucher UMMZ BMOC 08-0901-002 AD1343 cytochrome oxidase subunit I (COXI) gene, partial cds; mitochondrial	Metazoa	Arthropoda	Arachnida	Sarcoptiformes	Alicorhagiidae	Stigmalychus	NA
KY922385.1	Stigmalychus sp. 3 PBK-2017 voucher UMMZ BMOC 08-0901-012 AD1319 cytochrome oxidase subunit I (COXI) gene, partial cds; mitochondrial	Metazoa	Arthropoda	Arachnida	Sarcoptiformes	Alicorhagiidae	Stigmalychus	NA
KY922397.1	Rhagidiidae gen. sp. AD1060 voucher UMMZ BMOC 07-0615-002 AD1060 cytochrome oxidase subunit I (COXI) gene, partial cds; mitochondrial	Metazoa	Arthropoda	Arachnida	Trombidiformes	Rhagidiidae	NA	NA
KY922405.1	Neosilphitrombium tenebrionidum voucher UMMZ AML 12-0313-001 9A AD1807 cytochrome oxidase subunit I (COXI) gene, partial cds; mitochondrial	Metazoa	Arthropoda	Arachnida	Trombidiformes	Neothrombiidae	Neosilphitrombium	Neosilphitrombium tenebrionidum
KY922410.1	Tarsonemidae gen. sp. AD1063 voucher UMMZ BMOC 07-0502-001 AD1063 cytochrome oxidase subunit I (COXI) gene, partial cds; mitochondrial	Metazoa	Arthropoda	Arachnida	Trombidiformes	Tarsonemidae	NA	NA
KY922453.1	Brachychthoniidae sp. 3 PBK-2017 voucher UMMZ BMOC 08-0821-001 AD1301 cytochrome oxidase subunit I (COXI) gene, partial cds; mitochondrial	Metazoa	Arthropoda	Arachnida	Sarcoptiformes	Brachychthoniidae	NA	NA
LC222040.1	Ceratophysella denticulata mitochondrial COX1 gene for cytochrome c oxidase subunit 1, partial cds, isolate: Dy-h1	Metazoa	Arthropoda	Collembola	Poduromorpha	Hypogastruridae	Ceratophysella	Ceratophysella denticulata
MF601652.1	Entomobryidae sp. BIOUG19003-C04 cytochrome oxidase subunit 1 (COI) gene, partial cds; mitochondrial	Metazoa	Arthropoda	Collembola	Entomobryomorpha	Entomobryidae	NA	NA
MF602184.1	Entomobryidae sp. BIOUG14250-F03 cytochrome oxidase subunit 1 (COI) gene, partial cds; mitochondrial	Metazoa	Arthropoda	Collembola	Entomobryomorpha	Entomobryidae	NA	NA
MF605257.1	Dicyrtominae sp. BIOUG24348-G06 cytochrome oxidase subunit 1 (COI) gene, partial cds; mitochondrial	Metazoa	Arthropoda	Collembola	Symphypleona	Dicyrtomidae	NA	NA
MF606760.1	Entomobryidae sp. BIOUG26489-D01 cytochrome oxidase subunit 1 (COI) gene, partial cds; mitochondrial	Metazoa	Arthropoda	Collembola	Entomobryomorpha	Entomobryidae	NA	NA
MF608737.1	Tomoceridae sp. BIOUG26073-B05 cytochrome oxidase subunit 1 (COI) gene, partial cds; mitochondrial	Metazoa	Arthropoda	Collembola	Entomobryomorpha	Tomoceridae	NA	NA
MF608949.1	Katiannidae sp. BIOUG16745-E02 cytochrome oxidase subunit 1 (COI) gene, partial cds; mitochondrial	Metazoa	Arthropoda	Collembola	Symphypleona	Katiannidae	NA	NA
MF610275.1	Entomobryidae sp. BIOUG12953-G12 cytochrome oxidase subunit 1 (COI) gene, partial cds; mitochondrial	Metazoa	Arthropoda	Collembola	Entomobryomorpha	Entomobryidae	NA	NA
MF742469.1	Eupodidae sp. BIOUG21799-F06 cytochrome oxidase subunit 1 (COI) gene, partial cds; mitochondrial	Metazoa	Arthropoda	Arachnida	Trombidiformes	Eupodidae	NA	NA
MF742543.1	Eupodidae sp. BIOUG21383-G05 cytochrome oxidase subunit 1 (COI) gene, partial cds; mitochondrial	Metazoa	Arthropoda	Arachnida	Trombidiformes	Eupodidae	NA	NA
MF742855.1	Eupodidae sp. BIOUG27604-C01 cytochrome oxidase subunit 1 (COI) gene, partial cds; mitochondrial	Metazoa	Arthropoda	Arachnida	Trombidiformes	Eupodidae	NA	NA
MF744029.1	Eupodidae sp. BIOUG26608-F11 cytochrome oxidase subunit 1 (COI) gene, partial cds; mitochondrial	Metazoa	Arthropoda	Arachnida	Trombidiformes	Eupodidae	NA	NA
MF744446.1	Bdellidae sp. BIOUG21870-E12 cytochrome oxidase subunit 1 (COI) gene, partial cds; mitochondrial	Metazoa	Arthropoda	Arachnida	Trombidiformes	Bdellidae	NA	NA
MF745393.1	Tydeidae sp. BIOUG22148-E12 cytochrome oxidase subunit 1 (COI) gene, partial cds; mitochondrial	Metazoa	Arthropoda	Arachnida	Trombidiformes	Tydeidae	NA	NA
MF745564.1	Eupodidae sp. BIOUG17146-E11 cytochrome oxidase subunit 1 (COI) gene, partial cds; mitochondrial	Metazoa	Arthropoda	Arachnida	Trombidiformes	Eupodidae	NA	NA
MF745587.1	Pygmephoridae sp. BIOUG07011-F02 cytochrome oxidase subunit 1 (COI) gene, partial cds; mitochondrial	Metazoa	Arthropoda	Arachnida	Trombidiformes	Pygmephoridae	NA	NA
MF745655.1	Tydeidae sp. BIOUG13475-F02 cytochrome oxidase subunit 1 (COI) gene, partial cds; mitochondrial	Metazoa	Arthropoda	Arachnida	Trombidiformes	Tydeidae	NA	NA
MF746425.1	Rhagidiidae sp. BIOUG20921-B04 cytochrome oxidase subunit 1 (COI) gene, partial cds; mitochondrial	Metazoa	Arthropoda	Arachnida	Trombidiformes	Rhagidiidae	NA	NA
MF746782.1	Eupodidae sp. BIOUG13168-A08 cytochrome oxidase subunit 1 (COI) gene, partial cds; mitochondrial	Metazoa	Arthropoda	Arachnida	Trombidiformes	Eupodidae	NA	NA
MF747001.1	Penthalodidae sp. BIOUG13168-B08 cytochrome oxidase subunit 1 (COI) gene, partial cds; mitochondrial	Metazoa	Arthropoda	Arachnida	Trombidiformes	Penthalodidae	NA	NA
MF747117.1	Bdellidae sp. BIOUG26716-F08 cytochrome oxidase subunit 1 (COI) gene, partial cds; mitochondrial	Metazoa	Arthropoda	Arachnida	Trombidiformes	Bdellidae	NA	NA
MF747486.1	Linopodes sp. BIOUG03895-B03 cytochrome oxidase subunit 1 (COI) gene, partial cds; mitochondrial	Metazoa	Arthropoda	Arachnida	Trombidiformes	Eupodidae	Linopodes	NA
MF749436.1	Scutacaridae sp. BIOUG20066-H04 cytochrome oxidase subunit 1 (COI) gene, partial cds; mitochondrial	Metazoa	Arthropoda	Arachnida	Trombidiformes	Scutacaridae	NA	NA
MF749492.1	Eupodidae sp. BIOUG13538-F03 cytochrome oxidase subunit 1 (COI) gene, partial cds; mitochondrial	Metazoa	Arthropoda	Arachnida	Trombidiformes	Eupodidae	NA	NA
MF749581.1	Pachygnathidae sp. BIOUG27603-H08 cytochrome oxidase subunit 1 (COI) gene, partial cds; mitochondrial	Metazoa	Arthropoda	Arachnida	Sarcoptiformes	Pachygnathidae	NA	NA
MF751264.1	Eupodidae sp. BIOUG19501-B08 cytochrome oxidase subunit 1 (COI) gene, partial cds; mitochondrial	Metazoa	Arthropoda	Arachnida	Trombidiformes	Eupodidae	NA	NA
MF751419.1	Tetranychidae sp. BIOUG08018-B01 cytochrome oxidase subunit 1 (COI) gene, partial cds; mitochondrial	Metazoa	Arthropoda	Arachnida	Trombidiformes	Tetranychidae	NA	NA
MF751560.1	Eupodidae sp. BIOUG19504-F06 cytochrome oxidase subunit 1 (COI) gene, partial cds; mitochondrial	Metazoa	Arthropoda	Arachnida	Trombidiformes	Eupodidae	NA	NA
MF751799.1	Rhagidiidae sp. BIOUG20921-B03 cytochrome oxidase subunit 1 (COI) gene, partial cds; mitochondrial	Metazoa	Arthropoda	Arachnida	Trombidiformes	Rhagidiidae	NA	NA
MF752303.1	Eupodidae sp. BIOUG18712-E11 cytochrome oxidase subunit 1 (COI) gene, partial cds; mitochondrial	Metazoa	Arthropoda	Arachnida	Trombidiformes	Eupodidae	NA	NA
MF752382.1	Rhagidiidae sp. BIOUG21383-H03 cytochrome oxidase subunit 1 (COI) gene, partial cds; mitochondrial	Metazoa	Arthropoda	Arachnida	Trombidiformes	Rhagidiidae	NA	NA
MF814868.1	Parasitidae sp. BIOUG19845-F11 cytochrome oxidase subunit 1 (COI) gene, partial cds; mitochondrial	Metazoa	Arthropoda	Arachnida	Mesostigmata	Parasitidae	NA	NA
MF908662.1	Crotoniidae sp. BIOUG13596-C10 cytochrome oxidase subunit 1 (COI) gene, partial cds; mitochondrial	Metazoa	Arthropoda	Arachnida	Sarcoptiformes	Crotoniidae	NA	NA
MF909134.1	Phytoseiidae sp. BIOUG20139-C12 cytochrome oxidase subunit 1 (COI) gene, partial cds; mitochondrial	Metazoa	Arthropoda	Arachnida	Mesostigmata	Phytoseiidae	NA	NA
MF909673.1	Ceratozetidae sp. BIOUG16759-H11 cytochrome oxidase subunit 1 (COI) gene, partial cds; mitochondrial	Metazoa	Arthropoda	Arachnida	Sarcoptiformes	Ceratozetidae	NA	NA
MF909867.1	Phytoseiidae sp. BIOUG21364-G09 cytochrome oxidase subunit 1 (COI) gene, partial cds; mitochondrial	Metazoa	Arthropoda	Arachnida	Mesostigmata	Phytoseiidae	NA	NA
MF910011.1	Brachychthoniidae sp. BIOUG13567-G12 cytochrome oxidase subunit 1 (COI) gene, partial cds; mitochondrial	Metazoa	Arthropoda	Arachnida	Sarcoptiformes	Brachychthoniidae	NA	NA
MF910364.1	Tenuialidae sp. BIOUG21795-H08 cytochrome oxidase subunit 1 (COI) gene, partial cds; mitochondrial	Metazoa	Arthropoda	Arachnida	Sarcoptiformes	Tenuialidae	NA	NA
MF911107.1	Tenuialidae sp. BIOUG21795-G11 cytochrome oxidase subunit 1 (COI) gene, partial cds; mitochondrial	Metazoa	Arthropoda	Arachnida	Sarcoptiformes	Tenuialidae	NA	NA
MF912166.1	Eueremaeus sp. BIOUG26488-G10 cytochrome oxidase subunit 1 (COI) gene, partial cds; mitochondrial	Metazoa	Arthropoda	Arachnida	Sarcoptiformes	Eremaeidae	Eueremaeus	NA
MF912678.1	Achipteriidae sp. BIOUG12820-D01 cytochrome oxidase subunit 1 (COI) gene, partial cds; mitochondrial	Metazoa	Arthropoda	Arachnida	Sarcoptiformes	Achipteriidae	NA	NA
MF913030.1	Mycobatidae sp. BIOUG13539-H01 cytochrome oxidase subunit 1 (COI) gene, partial cds; mitochondrial	Metazoa	Arthropoda	Arachnida	Sarcoptiformes	Mycobatidae	NA	NA
MF913098.1	Cymbaeremaeidae sp. BIOUG16760-G11 cytochrome oxidase subunit 1 (COI) gene, partial cds; mitochondrial	Metazoa	Arthropoda	Arachnida	Sarcoptiformes	Cymbaeremaeidae	NA	NA
MF915071.1	Ceratozetidae sp. BIOUG27597-F12 cytochrome oxidase subunit 1 (COI) gene, partial cds; mitochondrial	Metazoa	Arthropoda	Arachnida	Sarcoptiformes	Ceratozetidae	NA	NA
MF916390.1	Onychiuridae sp. BIOUG26429-E10 cytochrome oxidase subunit 1 (COI) gene, partial cds; mitochondrial	Metazoa	Arthropoda	Collembola	Poduromorpha	Onychiuridae	NA	NA
MF916612.1	Pratanurida tananensis voucher BIOUG18927-A04 cytochrome oxidase subunit 1 (COI) gene, partial cds; mitochondrial	Metazoa	Arthropoda	Collembola	Poduromorpha	Neanuridae	Pratanurida	Pratanurida tananensis
MF916620.1	Ceratoppia sp. BIOUG27597-A07 cytochrome oxidase subunit 1 (COI) gene, partial cds; mitochondrial	Metazoa	Arthropoda	Arachnida	Sarcoptiformes	Ceratoppiidae	NA	NA
MF916727.1	Suctobelbidae sp. BIOUG20423-H05 cytochrome oxidase subunit 1 (COI) gene, partial cds; mitochondrial	Metazoa	Arthropoda	Arachnida	Sarcoptiformes	Suctobelbidae	NA	NA
MF917171.1	Anachipteria sp. BIOUG25375-D12 cytochrome oxidase subunit 1 (COI) gene, partial cds; mitochondrial	Metazoa	Arthropoda	Arachnida	Sarcoptiformes	Achipteriidae	NA	NA
MF917709.1	Scheloribatidae sp. BIOUG24043-B09 cytochrome oxidase subunit 1 (COI) gene, partial cds; mitochondrial	Metazoa	Arthropoda	Arachnida	Sarcoptiformes	Scheloribatidae	NA	NA
MF917914.1	Achipteriidae sp. BIOUG13679-B10 cytochrome oxidase subunit 1 (COI) gene, partial cds; mitochondrial	Metazoa	Arthropoda	Arachnida	Sarcoptiformes	Achipteriidae	NA	NA
MG032788.1	Entomobryidae sp. BIOUG31045-A06 cytochrome oxidase subunit 1 (COI) gene, partial cds; mitochondrial	Metazoa	Arthropoda	Collembola	Entomobryomorpha	Entomobryidae	NA	NA
MG035605.1	Entomobrya nivalis voucher BIOUG01768-D05 cytochrome oxidase subunit 1 (COI) gene, partial cds; mitochondrial	Metazoa	Arthropoda	Collembola	Entomobryomorpha	Entomobryidae	Entomobrya	Entomobrya nivalis
MG037038.1	Entomobrya nivalis voucher BIOUG01951-E07 cytochrome oxidase subunit 1 (COI) gene, partial cds; mitochondrial	Metazoa	Arthropoda	Collembola	Entomobryomorpha	Entomobryidae	Entomobrya	Entomobrya nivalis
MG208766.1	Aceria tosichella isolate ML549 cytochrome c oxidase subunit I (COI) gene, partial cds; mitochondrial	Metazoa	Arthropoda	Arachnida	Trombidiformes	Eriophyidae	Aceria	Aceria tosichella
MG251572.1	Olopachys compositus cytochrome c oxidase subunit I (COI) gene, partial cds; mitochondrial	Metazoa	Arthropoda	Arachnida	Mesostigmata	Pachylaelapidae	Olopachys	Olopachys compositus
MG310493.1	Eupodidae sp. BIOUG27039-G02 cytochrome oxidase subunit 1 (COI) gene, partial cds; mitochondrial	Metazoa	Arthropoda	Arachnida	Trombidiformes	Eupodidae	NA	NA
MG310931.1	Neocunaxoides sp. BIOUG25166-H06 cytochrome oxidase subunit 1 (COI) gene, partial cds; mitochondrial	Metazoa	Arthropoda	Arachnida	Trombidiformes	Cunaxidae	Neocunaxoides	NA
MG311403.1	Eupodidae sp. BIOUG24577-B02 cytochrome oxidase subunit 1 (COI) gene, partial cds; mitochondrial	Metazoa	Arthropoda	Arachnida	Trombidiformes	Eupodidae	NA	NA
MG311533.1	Tarsonemidae sp. BIOUG23545-B08 cytochrome oxidase subunit 1 (COI) gene, partial cds; mitochondrial	Metazoa	Arthropoda	Arachnida	Trombidiformes	Tarsonemidae	NA	NA
MG311643.1	Tydeidae sp. BIOUG25797-D04 cytochrome oxidase subunit 1 (COI) gene, partial cds; mitochondrial	Metazoa	Arthropoda	Arachnida	Trombidiformes	Tydeidae	NA	NA
MG314125.1	Stigmaeidae sp. BIOUG25167-H01 cytochrome oxidase subunit 1 (COI) gene, partial cds; mitochondrial	Metazoa	Arthropoda	Arachnida	Trombidiformes	Stigmaeidae	NA	NA
MG314389.1	Tarsonemidae sp. BIOUG23546-C09 cytochrome oxidase subunit 1 (COI) gene, partial cds; mitochondrial	Metazoa	Arthropoda	Arachnida	Trombidiformes	Tarsonemidae	NA	NA
MG314431.1	Pygmephoridae sp. BIOUG12729-E05 cytochrome oxidase subunit 1 (COI) gene, partial cds; mitochondrial	Metazoa	Arthropoda	Arachnida	Trombidiformes	Pygmephoridae	NA	NA
MG314658.1	Scutacaridae sp. BIOUG27128-C10 cytochrome oxidase subunit 1 (COI) gene, partial cds; mitochondrial	Metazoa	Arthropoda	Arachnida	Trombidiformes	Scutacaridae	NA	NA
MG314789.1	Rhagidiidae sp. 08WOLVES-00121 cytochrome oxidase subunit 1 (COI) gene, partial cds; mitochondrial	Metazoa	Arthropoda	Arachnida	Trombidiformes	Rhagidiidae	NA	NA
MG314815.1	Tydeidae sp. BIOUG24223-C03 cytochrome oxidase subunit 1 (COI) gene, partial cds; mitochondrial	Metazoa	Arthropoda	Arachnida	Trombidiformes	Tydeidae	NA	NA
MG314885.1	Tydeidae sp. BIOUG27444-A03 cytochrome oxidase subunit 1 (COI) gene, partial cds; mitochondrial	Metazoa	Arthropoda	Arachnida	Trombidiformes	Tydeidae	NA	NA
MG315012.1	Rhagidiidae sp. BIOUG23108-C03 cytochrome oxidase subunit 1 (COI) gene, partial cds; mitochondrial	Metazoa	Arthropoda	Arachnida	Trombidiformes	Rhagidiidae	NA	NA
MG315990.1	Rhagidiidae sp. BIOUG24224-D05 cytochrome oxidase subunit 1 (COI) gene, partial cds; mitochondrial	Metazoa	Arthropoda	Arachnida	Trombidiformes	Rhagidiidae	NA	NA
MG316003.1	Rhagidiidae sp. BIOUG23420-A04 cytochrome oxidase subunit 1 (COI) gene, partial cds; mitochondrial	Metazoa	Arthropoda	Arachnida	Trombidiformes	Rhagidiidae	NA	NA
MG316023.1	Tarsonemidae sp. BIOUG25798-E04 cytochrome oxidase subunit 1 (COI) gene, partial cds; mitochondrial	Metazoa	Arthropoda	Arachnida	Trombidiformes	Tarsonemidae	NA	NA
MG316139.1	Tarsonemidae sp. BIOUG25924-D01 cytochrome oxidase subunit 1 (COI) gene, partial cds; mitochondrial	Metazoa	Arthropoda	Arachnida	Trombidiformes	Tarsonemidae	NA	NA
MG316232.1	Tarsonemidae sp. BIOUG24517-C04 cytochrome oxidase subunit 1 (COI) gene, partial cds; mitochondrial	Metazoa	Arthropoda	Arachnida	Trombidiformes	Tarsonemidae	NA	NA
MG316849.1	Eupodidae sp. BIOUG25723-A11 cytochrome oxidase subunit 1 (COI) gene, partial cds; mitochondrial	Metazoa	Arthropoda	Arachnida	Trombidiformes	Eupodidae	NA	NA
MG317070.1	Tarsonemidae sp. BIOUG24959-E11 cytochrome oxidase subunit 1 (COI) gene, partial cds; mitochondrial	Metazoa	Arthropoda	Arachnida	Trombidiformes	Tarsonemidae	NA	NA
MG317200.1	Eupodidae sp. BIOUG27130-C08 cytochrome oxidase subunit 1 (COI) gene, partial cds; mitochondrial	Metazoa	Arthropoda	Arachnida	Trombidiformes	Eupodidae	NA	NA
MG317470.1	Microtydeus sp. BIOUG25925-F08 cytochrome oxidase subunit 1 (COI) gene, partial cds; mitochondrial	Metazoa	Arthropoda	Arachnida	Sarcoptiformes	Iolinidae	NA	NA
MG317499.1	Rhagidiidae sp. BIOUG23110-F01 cytochrome oxidase subunit 1 (COI) gene, partial cds; mitochondrial	Metazoa	Arthropoda	Arachnida	Trombidiformes	Rhagidiidae	NA	NA
MG317585.1	Eupodidae sp. BIOUG24226-D05 cytochrome oxidase subunit 1 (COI) gene, partial cds; mitochondrial	Metazoa	Arthropoda	Arachnida	Trombidiformes	Eupodidae	NA	NA
MG317708.1	Eupodidae sp. BIOUG23253-G03 cytochrome oxidase subunit 1 (COI) gene, partial cds; mitochondrial	Metazoa	Arthropoda	Arachnida	Trombidiformes	Eupodidae	NA	NA
MG317718.1	Tydeidae sp. BIOUG26106-F03 cytochrome oxidase subunit 1 (COI) gene, partial cds; mitochondrial	Metazoa	Arthropoda	Arachnida	Trombidiformes	Tydeidae	NA	NA
MG317746.1	Scutacaridae sp. BIOUG26737-C03 cytochrome oxidase subunit 1 (COI) gene, partial cds; mitochondrial	Metazoa	Arthropoda	Arachnida	Trombidiformes	Scutacaridae	NA	NA
MG317780.1	Tarsonemidae sp. BIOUG26738-G11 cytochrome oxidase subunit 1 (COI) gene, partial cds; mitochondrial	Metazoa	Arthropoda	Arachnida	Trombidiformes	Tarsonemidae	NA	NA
MG318045.1	Sminthurididae sp. BIOUG24572-H03 cytochrome oxidase subunit 1 (COI) gene, partial cds; Mitochondrial	Metazoa	Arthropoda	Collembola	Symphypleona	Sminthurididae	NA	NA
MG318261.1	Rhagidiidae sp. DPMIT-34-46 cytochrome oxidase subunit 1 (COI) gene, partial cds; mitochondrial	Metazoa	Arthropoda	Arachnida	Trombidiformes	Rhagidiidae	NA	NA
MG318628.1	Scutacaridae sp. BIOUG24576-E08 cytochrome oxidase subunit 1 (COI) gene, partial cds; mitochondrial	Metazoa	Arthropoda	Arachnida	Trombidiformes	Scutacaridae	NA	NA
MG318818.1	Eupodidae sp. BIOUG24517-E05 cytochrome oxidase subunit 1 (COI) gene, partial cds; mitochondrial	Metazoa	Arthropoda	Arachnida	Trombidiformes	Eupodidae	NA	NA
MG319065.1	Tydeidae sp. BIOUG24577-E07 cytochrome oxidase subunit 1 (COI) gene, partial cds; mitochondrial	Metazoa	Arthropoda	Arachnida	Trombidiformes	Tydeidae	NA	NA
MG319107.1	Eupodidae sp. BIOUG23545-B03 cytochrome oxidase subunit 1 (COI) gene, partial cds; mitochondrial	Metazoa	Arthropoda	Arachnida	Trombidiformes	Eupodidae	NA	NA
MG319242.1	Tydeidae sp. BIOUG23253-G07 cytochrome oxidase subunit 1 (COI) gene, partial cds; mitochondrial	Metazoa	Arthropoda	Arachnida	Trombidiformes	Tydeidae	NA	NA
MG319414.1	Scutacaridae sp. BIOUG26737-B07 cytochrome oxidase subunit 1 (COI) gene, partial cds; mitochondrial	Metazoa	Arthropoda	Arachnida	Trombidiformes	Scutacaridae	NA	NA
MG319500.1	Tarsonemidae sp. BIOUG24564-H03 cytochrome oxidase subunit 1 (COI) gene, partial cds; mitochondrial	Metazoa	Arthropoda	Arachnida	Trombidiformes	Tarsonemidae	NA	NA
MG319722.1	Eupodidae sp. BIOUG24225-E10 cytochrome oxidase subunit 1 (COI) gene, partial cds; mitochondrial	Metazoa	Arthropoda	Arachnida	Trombidiformes	Eupodidae	NA	NA
MG319748.1	Tydeidae sp. BIOUG24230-A10 cytochrome oxidase subunit 1 (COI) gene, partial cds; mitochondrial	Metazoa	Arthropoda	Arachnida	Trombidiformes	Tydeidae	NA	NA
MG320094.1	Eupodidae sp. BIOUG23545-C09 cytochrome oxidase subunit 1 (COI) gene, partial cds; mitochondrial	Metazoa	Arthropoda	Arachnida	Trombidiformes	Eupodidae	NA	NA
MG320390.1	Tydeidae sp. BIOUG25166-E03 cytochrome oxidase subunit 1 (COI) gene, partial cds; mitochondrial	Metazoa	Arthropoda	Arachnida	Trombidiformes	Tydeidae	NA	NA
MG320827.1	Cunaxidae sp. BIOUG24228-B08 cytochrome oxidase subunit 1 (COI) gene, partial cds; mitochondrial	Metazoa	Arthropoda	Arachnida	Trombidiformes	Cunaxidae	NA	NA
MG321080.1	Eupodidae sp. BIOUG25167-C10 cytochrome oxidase subunit 1 (COI) gene, partial cds; mitochondrial	Metazoa	Arthropoda	Arachnida	Trombidiformes	Eupodidae	NA	NA
MG408279.1	Tectocepheus sp. BIOUG25925-G10 cytochrome oxidase subunit 1 (COI) gene, partial cds; mitochondrial	Metazoa	Arthropoda	Arachnida	Sarcoptiformes	Tectocepheidae	Tectocepheus	NA
MG408296.1	Acaridae sp. BIOUG24574-F02 cytochrome oxidase subunit 1 (COI) gene, partial cds; mitochondrial	Metazoa	Arthropoda	Arachnida	Sarcoptiformes	Acaridae	NA	NA
MG408368.1	Kramerellidae sp. BIOUG15124-G11 cytochrome oxidase subunit 1 (COI) gene, partial cds; mitochondrial	Metazoa	Arthropoda	Arachnida	Sarcoptiformes	Kramerellidae	NA	NA
MG408433.1	Speleorchestes sp. BIOUG26104-H09 cytochrome oxidase subunit 1 (COI) gene, partial cds; mitochondrial	Metazoa	Arthropoda	Arachnida	Sarcoptiformes	Nanorchestidae	Speleorchestes	NA
MG408984.1	Brachychthoniidae sp. BIOUG26323-B09 cytochrome oxidase subunit 1 (COI) gene, partial cds; mitochondrial	Metazoa	Arthropoda	Arachnida	Sarcoptiformes	Brachychthoniidae	NA	NA
MG409262.1	Proctophyllodes sp. BIOUG31170-F07 cytochrome oxidase subunit 1 (COI) gene, partial cds; mitochondrial	Metazoa	Arthropoda	Arachnida	Sarcoptiformes	Proctophyllodidae	Proctophyllodes	NA
MG409470.1	Suctobelbidae sp. BIOUG24219-F04 cytochrome oxidase subunit 1 (COI) gene, partial cds; mitochondrial	Metazoa	Arthropoda	Arachnida	Sarcoptiformes	Suctobelbidae	NA	NA
MG409690.1	Tectocepheus sp. BIOUG25924-A11 cytochrome oxidase subunit 1 (COI) gene, partial cds; mitochondrial	Metazoa	Arthropoda	Arachnida	Sarcoptiformes	Tectocepheidae	Tectocepheus	NA
MG409729.1	Ereynetidae sp. BIOUG26740-D12 cytochrome oxidase subunit 1 (COI) gene, partial cds; mitochondrial	Metazoa	Arthropoda	Arachnida	Trombidiformes	Ereynetidae	NA	NA
MG410079.1	Galumnidae sp. BIOUG23549-B12 cytochrome oxidase subunit 1 (COI) gene, partial cds; mitochondrial	Metazoa	Arthropoda	Arachnida	Sarcoptiformes	Galumnidae	NA	NA
MG410173.1	Oribatulidae sp. BIOUG24577-C07 cytochrome oxidase subunit 1 (COI) gene, partial cds; mitochondrial	Metazoa	Arthropoda	Arachnida	Sarcoptiformes	Oribatulidae	NA	NA
MG410709.1	Rhodacarellus silesiacus voucher BIOUG25924-A09 cytochrome oxidase subunit 1 (COI) gene, partial cds; mitochondrial	Metazoa	Arthropoda	Arachnida	Mesostigmata	Rhodacaridae	Rhodacarellus	Rhodacarellus silesiacus
MG410725.1	Eremaeidae sp. BIOUG23548-C11 cytochrome oxidase subunit 1 (COI) gene, partial cds; mitochondrial	Metazoa	Arthropoda	Arachnida	Sarcoptiformes	Eremaeidae	NA	NA
MG410984.1	Oribatulidae sp. BIOUG16146-C06 cytochrome oxidase subunit 1 (COI) gene, partial cds; mitochondrial	Metazoa	Arthropoda	Arachnida	Sarcoptiformes	Oribatulidae	NA	NA
MG411041.1	Oppiidae sp. BIOUG24577-A01 cytochrome oxidase subunit 1 (COI) gene, partial cds; mitochondrial	Metazoa	Arthropoda	Arachnida	Sarcoptiformes	Oppiidae	NA	NA
MG411142.1	Scapheremaeus sp. BIOUG23534-F08 cytochrome oxidase subunit 1 (COI) gene, partial cds; mitochondrial	Metazoa	Arthropoda	Arachnida	Sarcoptiformes	Cymbaeremaeidae	Scapheremaeus	NA
MG411766.1	Eremaeus sp. BIOUG24228-H05 cytochrome oxidase subunit 1 (COI) gene, partial cds; mitochondrial	Metazoa	Arthropoda	Arachnida	Sarcoptiformes	Eremaeidae	Eremaeus	NA
MG411820.1	Analgidae sp. BIOUG31170-H10 cytochrome oxidase subunit 1 (COI) gene, partial cds; mitochondrial	Metazoa	Arthropoda	Arachnida	Sarcoptiformes	Analgidae	NA	NA
MG411849.1	Oppiella sp. BIOUG26322-E03 cytochrome oxidase subunit 1 (COI) gene, partial cds; mitochondrial	Metazoa	Arthropoda	Arachnida	Sarcoptiformes	Oppiidae	Oppiella	NA
MG412244.1	Phytoseiidae sp. BIOUG10897-C12 cytochrome oxidase subunit 1 (COI) gene, partial cds; mitochondrial	Metazoa	Arthropoda	Arachnida	Mesostigmata	Phytoseiidae	NA	NA
MG412324.1	Rhodacaridae sp. BIOUG24564-A06 cytochrome oxidase subunit 1 (COI) gene, partial cds; mitochondrial	Metazoa	Arthropoda	Arachnida	Mesostigmata	Rhodacaridae	NA	NA
MG413050.1	Tectocepheus sp. BIOUG24576-F06 cytochrome oxidase subunit 1 (COI) gene, partial cds; mitochondrial	Metazoa	Arthropoda	Arachnida	Sarcoptiformes	Tectocepheidae	Tectocepheus	NA
MG413615.1	Picalgoides picimajoris voucher BIOUG15124-E07 cytochrome oxidase subunit 1 (COI) gene, partial cds; mitochondrial	Metazoa	Arthropoda	Arachnida	Sarcoptiformes	Psoroptoididae	NA	NA
MG413797.1	Oppiella sp. BIOUG24519-A03 cytochrome oxidase subunit 1 (COI) gene, partial cds; mitochondrial	Metazoa	Arthropoda	Arachnida	Sarcoptiformes	Oppiidae	Oppiella	NA
MG414410.1	Acaridae sp. BIOUG25798-F01 cytochrome oxidase subunit 1 (COI) gene, partial cds; mitochondrial	Metazoa	Arthropoda	Arachnida	Sarcoptiformes	Acaridae	NA	NA
MG414760.1	Ceratozetidae sp. BIOUG23950-G05 cytochrome oxidase subunit 1 (COI) gene, partial cds; mitochondrial	Metazoa	Arthropoda	Arachnida	Sarcoptiformes	Ceratozetidae	NA	NA
MG415227.1	Melicharidae sp. BIOUG07428-G10 cytochrome oxidase subunit 1 (COI) gene, partial cds; mitochondrial	Metazoa	Arthropoda	Arachnida	Mesostigmata	Melicharidae	NA	NA
MG415328.1	Leptolaelaps sp. BIOUG23957-B09 cytochrome oxidase subunit 1 (COI) gene, partial cds; mitochondrial	Metazoa	Arthropoda	Arachnida	Mesostigmata	Leptolaelapidae	NA	NA
MG415879.1	Ologamasidae sp. 09PROBE-09276 cytochrome oxidase subunit 1 (COI) gene, partial cds; mitochondrial	Metazoa	Arthropoda	Arachnida	Mesostigmata	Ologamasidae	NA	NA
MG415889.1	Trhypochthoniidae sp. BIOUG27290-F01 cytochrome oxidase subunit 1 (COI) gene, partial cds; mitochondrial	Metazoa	Arthropoda	Arachnida	Sarcoptiformes	Trhypochthoniidae	NA	NA
MG415907.1	Laelapidae sp. BIOUG24071-D07 cytochrome oxidase subunit 1 (COI) gene, partial cds; mitochondrial	Metazoa	Arthropoda	Arachnida	Mesostigmata	Laelapidae	NA	NA
MG415922.1	Phytoseiidae sp. BIOUG26106-H11 cytochrome oxidase subunit 1 (COI) gene, partial cds; mitochondrial	Metazoa	Arthropoda	Arachnida	Mesostigmata	Phytoseiidae	NA	NA
MG766229.1	Mesalgoides sp. UMMZ BMOC 06-0717-001 voucher UMMZ BMOC 06-0717-001 AD1042 cytochrome oxidase subunit I (COXI) gene, partial cds; mitochondrial	Metazoa	Arthropoda	Arachnida	Sarcoptiformes	Psoroptoididae	NA	NA
MG947348.1	Oppiidae sp. 7504_094 cytochrome oxidase subunit I (COI) gene, partial cds; mitochondrial	Metazoa	Arthropoda	Arachnida	Sarcoptiformes	Oppiidae	NA	NA
MG947350.1	Scutoverticidae sp. 7504_097 cytochrome oxidase subunit I (COI) gene, partial cds; mitochondrial	Metazoa	Arthropoda	Arachnida	Sarcoptiformes	Scutoverticidae	NA	NA
MH675925.1	Agistemus lobatus voucher Agilob0880 cytochrome oxidase subunit 1 (COI) gene, partial cds; mitochondrial	Metazoa	Arthropoda	Arachnida	Trombidiformes	Stigmaeidae	Agistemus	Agistemus lobatus
MH921997.1	Histiostomatidae sp. XFX mitochondrion, complete genome	Metazoa	Arthropoda	Arachnida	Sarcoptiformes	Histiostomatidae	NA	NA
MH983851.1	Proctolaelaps scolyti voucher POD0ME404 cytochrome oxidase subunit 1 (COI) gene, partial cds; mitochondrial	Metazoa	Arthropoda	Arachnida	Mesostigmata	Ascidae	scolyti	Proctolaelaps scolyti
MH983853.1	Lasioseius fimetorum voucher HUJINVACA99 cytochrome oxidase subunit 1 (COI) gene, partial cds; mitochondrial	Metazoa	Arthropoda	Arachnida	Mesostigmata	Blattisociidae	Lasioseius	Lasioseius fimetorum
MK015021.1	Chamobates sp. BMOC 17-0901-033 cytochrome c oxidase subunit I (COI) gene, partial cds; mitochondrial	Metazoa	Arthropoda	Arachnida	Sarcoptiformes	Chamobatidae	Chamobates	NA
MK371430.1	Rhipicephalus microplus isolate Ankang-Rm-tick140 cytochrome oxidase subunit I (COI) gene, partial cds; mitochondrial	Metazoa	Arthropoda	Arachnida	Ixodida	NA	NA	NA
MK577646.1	Proprioseiopsis lenis cytochrome oxidase subunit 1 gene, partial cds; mitochondrial	Metazoa	Arthropoda	Arachnida	Mesostigmata	Phytoseiidae	Proprioseiopsis	Proprioseiopsis lenis
MK714198.1	Dermatophagoides sp. WH_6 clone WH_6 cytochrome oxidase subunit I (COI) gene, partial cds; mitochondrial	Metazoa	Arthropoda	Arachnida	Sarcoptiformes	Pyroglyphidae	NA	NA
MN347036.1	Tydeidae sp. BOLD:ADE4160 voucher BIOUG30841-D01 cytochrome oxidase subunit 1 (COI) gene, partial cds; mitochondrial	Metazoa	Arthropoda	Arachnida	Trombidiformes	Tydeidae	NA	NA
MN347071.1	Scheloribates sp. BOLD:ADI4824 voucher RAM.TMS.M00022610 cytochrome oxidase subunit 1 (COI) gene, partial cds; mitochondrial	Metazoa	Arthropoda	Arachnida	Sarcoptiformes	Scheloribatidae	Scheloribates	NA
MN347150.1	Scheloribatidae sp. BOLD:AAL8123 voucher BIOUG35441-F02 cytochrome oxidase subunit 1 (COI) gene, partial cds; mitochondrial	Metazoa	Arthropoda	Arachnida	Sarcoptiformes	Scheloribatidae	NA	NA
MN347168.1	Oribatodes mirabilis voucher BIOUG33988-D12 cytochrome oxidase subunit 1 (COI) gene, partial cds; mitochondrial	Metazoa	Arthropoda	Arachnida	Sarcoptiformes	Cepheidae	NA	NA
MN347363.1	Tydeidae sp. BOLD:ACV5008 voucher BIOUG23252-H04 cytochrome oxidase subunit 1 (COI) gene, partial cds; mitochondrial	Metazoa	Arthropoda	Arachnida	Trombidiformes	Tydeidae	NA	NA
MN347670.1	Eremaeidae sp. BOLD:AAL8123 voucher BIOUG35461-B01 cytochrome oxidase subunit 1 (COI) gene, partial cds; mitochondrial	Metazoa	Arthropoda	Arachnida	Sarcoptiformes	Eremaeidae	NA	NA
MN347794.1	Eremaeus translamellatus voucher BIOUG35461-E09 cytochrome oxidase subunit 1 (COI) gene, partial cds; mitochondrial	Metazoa	Arthropoda	Arachnida	Sarcoptiformes	Eremaeidae	Eremaeus	NA
MN348022.1	Eupodidae sp. BOLD:ADF4821 voucher BIOUG31598-C12 cytochrome oxidase subunit 1 (COI) gene, partial cds; mitochondrial	Metazoa	Arthropoda	Arachnida	Trombidiformes	Eupodidae	NA	NA
MN348572.1	Protoribates sp. BOLD:AAH7635 voucher 910SW.5 cytochrome oxidase subunit 1 (COI) gene, partial cds; mitochondrial	Metazoa	Arthropoda	Arachnida	Sarcoptiformes	Haplozetidae	NA	NA
MN348681.1	Acaridae sp. BOLD:ADE3195 voucher BIOUG24960-F03 cytochrome oxidase subunit 1 (COI) gene, partial cds; mitochondrial	Metazoa	Arthropoda	Arachnida	Sarcoptiformes	Acaridae	NA	NA
MN348715.1	Eupelops sp. BOLD:AAU4376 voucher 892SW.1 cytochrome oxidase subunit 1 (COI) gene, partial cds; mitochondrial	Metazoa	Arthropoda	Arachnida	Sarcoptiformes	Phenopelopidae	Eupelops	NA
MN348794.1	Achipteria sp. BOLD:ADI4824 voucher RAM.TMS.M00022042 cytochrome oxidase subunit 1 (COI) gene, partial cds; mitochondrial	Metazoa	Arthropoda	Arachnida	Sarcoptiformes	Achipteriidae	NA	NA
MN348924.1	Peloribates sp. BOLD:ADI4824 voucher RAM.TMS.M00022493 cytochrome oxidase subunit 1 (COI) gene, partial cds; mitochondrial	Metazoa	Arthropoda	Arachnida	Sarcoptiformes	Haplozetidae	NA	NA
MN348999.1	Eremaeidae sp. BOLD:ADD3715 voucher BIOUG30676-E12 cytochrome oxidase subunit 1 (COI) gene, partial cds; mitochondrial	Metazoa	Arthropoda	Arachnida	Sarcoptiformes	Eremaeidae	NA	NA
MN349008.1	Hydrozetes sp. BOLD:AAF9074 voucher RAM.TMS.M00022316 cytochrome oxidase subunit 1 (COI) gene, partial cds; mitochondrial	Metazoa	Arthropoda	Arachnida	Sarcoptiformes	Hydrozetidae	Hydrozetes	NA
MN349097.1	Tydeidae sp. BOLD:ADE0438 voucher BIOUG30841-D06 cytochrome oxidase subunit 1 (COI) gene, partial cds; mitochondrial	Metazoa	Arthropoda	Arachnida	Trombidiformes	Tydeidae	NA	NA
MN349122.1	Propelops sp. BOLD:AAB0332 voucher 1041SW41.2 cytochrome oxidase subunit 1 (COI) gene, partial cds; mitochondrial	Metazoa	Arthropoda	Arachnida	Sarcoptiformes	Phenopelopidae	Propelops	NA
MN349124.1	Eueremaeus sp. BOLD:ADI4824 voucher RAM.TMS.M00022218 cytochrome oxidase subunit 1 (COI) gene, partial cds; mitochondrial	Metazoa	Arthropoda	Arachnida	Sarcoptiformes	Eremaeidae	Eueremaeus	NA
MN349125.1	Aeroppia sp. BOLD:ADI4824 voucher RAM.TMS.M00022048 cytochrome oxidase subunit 1 (COI) gene, partial cds; mitochondrial	Metazoa	Arthropoda	Arachnida	Sarcoptiformes	Oppiidae	NA	NA
MN349482.1	Aeroppia sp. BOLD:ADD3060 voucher RAM.TMS.M00022049 cytochrome oxidase subunit 1 (COI) gene, partial cds; mitochondrial	Metazoa	Arthropoda	Arachnida	Sarcoptiformes	Oppiidae	NA	NA
MN349530.1	Eupodidae sp. BIOUG23551-E05 cytochrome oxidase subunit 1 (COI) gene, partial cds; mitochondrial	Metazoa	Arthropoda	Arachnida	Trombidiformes	Eupodidae	NA	NA
MN349621.1	Zygoribatula sp. BOLD:ACW5783 voucher RAM.TMS.M00022685 cytochrome oxidase subunit 1 (COI) gene, partial cds; mitochondrial	Metazoa	Arthropoda	Arachnida	Sarcoptiformes	Oribatulidae	NA	NA
MN349874.1	Punctoribates sp. BOLD:ADE1710 voucher BIOUG30839-G08 cytochrome oxidase subunit 1 (COI) gene, partial cds; mitochondrial	Metazoa	Arthropoda	Arachnida	Sarcoptiformes	Punctoribatidae	NA	NA
MN350395.1	Hermanniellidae sp. BOLD:ACZ6785 voucher BIOUG30843-B08 cytochrome oxidase subunit 1 (COI) gene, partial cds; mitochondrial	Metazoa	Arthropoda	Arachnida	Sarcoptiformes	Hermanniellidae	NA	NA
MN350401.1	Tydeidae sp. BOLD:ADE1994 voucher BIOUG30838-G08 cytochrome oxidase subunit 1 (COI) gene, partial cds; mitochondrial	Metazoa	Arthropoda	Arachnida	Trombidiformes	Tydeidae	NA	NA
MN350825.1	Suctobelbidae sp. BIOUG35442-F08 cytochrome oxidase subunit 1 (COI) gene, partial cds; mitochondrial	Metazoa	Arthropoda	Arachnida	Sarcoptiformes	Suctobelbidae	NA	NA
MN351140.1	Uropodidae sp. BIOUG32113-A11 cytochrome oxidase subunit 1 (COI) gene, partial cds; mitochondrial	Metazoa	Arthropoda	Arachnida	Mesostigmata	Uropodidae	NA	NA
MN351399.1	Eupodidae sp. BOLD:AAL8146 voucher BIOUG30684-D04 cytochrome oxidase subunit 1 (COI) gene, partial cds; mitochondrial	Metazoa	Arthropoda	Arachnida	Trombidiformes	Eupodidae	NA	NA
MN351589.1	Zygoribatula sp. BOLD:ACW5783 voucher BIOUG30852-A10 cytochrome oxidase subunit 1 (COI) gene, partial cds; mitochondrial	Metazoa	Arthropoda	Arachnida	Sarcoptiformes	Oribatulidae	NA	NA
MN351705.1	Epidamaeus sp. BOLD:ADI8411 voucher RAM.TMS.M00022170 cytochrome oxidase subunit 1 (COI) gene, partial cds; mitochondrial	Metazoa	Arthropoda	Arachnida	Sarcoptiformes	Damaeidae	NA	NA
MN351728.1	Aeroppia sp. BOLD:ADD3060 voucher RAM.TMS.M00022047 cytochrome oxidase subunit 1 (COI) gene, partial cds; mitochondrial	Metazoa	Arthropoda	Arachnida	Sarcoptiformes	Oppiidae	NA	NA
MN351733.1	Ceratozetes sp. BOLD:AAB3350 voucher 868NE28.1 cytochrome oxidase subunit 1 (COI) gene, partial cds; mitochondrial	Metazoa	Arthropoda	Arachnida	Sarcoptiformes	Ceratozetidae	NA	NA
MN351853.1	Eupodidae sp. BOLD:ADE0698 voucher BIOUG30841-C06 cytochrome oxidase subunit 1 (COI) gene, partial cds; mitochondrial	Metazoa	Arthropoda	Arachnida	Trombidiformes	Eupodidae	NA	NA
MN351972.1	Zerconidae sp. BOLD:AAL8123 voucher BIOUG35442-D08 cytochrome oxidase subunit 1 (COI) gene, partial cds; mitochondrial	Metazoa	Arthropoda	Arachnida	Mesostigmata	Zerconidae	NA	NA
MN352302.1	Tydeidae sp. BOLD:ADF0622 voucher BIOUG30839-E05 cytochrome oxidase subunit 1 (COI) gene, partial cds; mitochondrial	Metazoa	Arthropoda	Arachnida	Trombidiformes	Hydropsychidae	Tydeidae	NA
MN352802.1	Anachipteria sp. BOLD:AAK1476 voucher RAM.TMS.M00022061 cytochrome oxidase subunit 1 (COI) gene, partial cds; mitochondrial	Metazoa	Arthropoda	Arachnida	Sarcoptiformes	Achipteriidae	NA	NA
MN352873.1	Hemileius sp. BOLD:ACY2553 voucher RAM.TMS.M00022293 cytochrome oxidase subunit 1 (COI) gene, partial cds; mitochondrial	Metazoa	Arthropoda	Arachnida	Sarcoptiformes	Hemileiidae	Hemileius	NA
MN353318.1	Eupodidae sp. BOLD:ADD2337 voucher BIOUG30426-D12 cytochrome oxidase subunit 1 (COI) gene, partial cds; mitochondrial	Metazoa	Arthropoda	Arachnida	Trombidiformes	Eupodidae	NA	NA
MN353648.1	Scutacaridae sp. BIOUG30851-D02 cytochrome oxidase subunit 1 (COI) gene, partial cds; mitochondrial	Metazoa	Arthropoda	Arachnida	Trombidiformes	Scutacaridae	NA	NA
MN353832.1	Nothrus sp. RAM.TMS.M00022411 cytochrome oxidase subunit 1 (COI) gene, partial cds; mitochondrial	Metazoa	Arthropoda	Arachnida	Sarcoptiformes	Nothridae	NA	NA
MN354286.1	Multidentorhodacarus sp. BOLD:ACV4562 voucher BIOUG30841-B07 cytochrome oxidase subunit 1 (COI) gene, partial cds; mitochondrial	Metazoa	Arthropoda	Arachnida	Mesostigmata	Rhodacaridae	NA	NA
MN354476.1	Allosuctobelba sp. BOLD:ACY1950 voucher RAM.TMS.M00022695 cytochrome oxidase subunit 1 (COI) gene, partial cds; mitochondrial	Metazoa	Arthropoda	Arachnida	Sarcoptiformes	Suctobelbidae	NA	NA
MN354548.1	Holaspina sp. BOLD:AAF9134 voucher 08MIONT-0120 cytochrome oxidase subunit 1 (COI) gene, partial cds; mitochondrial	Metazoa	Arthropoda	Arachnida	Mesostigmata	Parholaspididae	Holaspina	NA
MN354557.1	Euphthiracaridae sp. BIOUG33988-A06 cytochrome oxidase subunit 1 (COI) gene, partial cds; mitochondrial	Metazoa	Arthropoda	Arachnida	Sarcoptiformes	Euphthiracaridae	NA	NA
MN354669.1	Rhagidiidae sp. BIOUG35462-A06 cytochrome oxidase subunit 1 (COI) gene, partial cds; mitochondrial	Metazoa	Arthropoda	Arachnida	Trombidiformes	Rhagidiidae	NA	NA
MN354919.1	Sarcoptiformes sp. BOLD:ADD1497 voucher BIOUG30428-A05 cytochrome oxidase subunit 1 (COI) gene, partial cds; mitochondrial	Metazoa	Arthropoda	Arachnida	Sarcoptiformes	Sarcoptiformes sp.	NA	NA
MN354996.1	Chamobates sp. BIOUG35417-E06 cytochrome oxidase subunit 1 (COI) gene, partial cds; mitochondrial	Metazoa	Arthropoda	Arachnida	Sarcoptiformes	Chamobatidae	Chamobates	NA
MN355061.1	Multidentorhodacarus sp. BIOUG23550-C11 cytochrome oxidase subunit 1 (COI) gene, partial cds; mitochondrial	Metazoa	Arthropoda	Arachnida	Mesostigmata	Rhodacaridae	NA	NA
MN355070.1	Trouessartia sp. BIOUG21866-B11 cytochrome oxidase subunit 1 (COI) gene, partial cds; mitochondrial	Metazoa	Arthropoda	Arachnida	Sarcoptiformes	Trouessartiidae	NA	NA
MN355200.1	Penthaleidae sp. BOLD:ADD3367 voucher BIOUG30676-B12 cytochrome oxidase subunit 1 (COI) gene, partial cds; mitochondrial	Metazoa	Arthropoda	Arachnida	Trombidiformes	Penthaleidae	NA	NA
MN356655.1	Ceratokalummidae sp. BOLD:ADI0499 voucher BIOUG32943-C04 cytochrome oxidase subunit 1 (COI) gene, partial cds; mitochondrial	Metazoa	Arthropoda	Arachnida	Sarcoptiformes	Ceratokalummidae	NA	NA
MN357332.1	Chamobates sp. BOLD:ACO2816 voucher BIOUG34557-H02 cytochrome oxidase subunit 1 (COI) gene, partial cds; mitochondrial	Metazoa	Arthropoda	Arachnida	Sarcoptiformes	Chamobatidae	Chamobates	NA
MN357690.1	Scutacaridae sp. BOLD:ADG3275 voucher BIOUG33963-A08 cytochrome oxidase subunit 1 (COI) gene, partial cds; mitochondrial	Metazoa	Arthropoda	Arachnida	Trombidiformes	Scutacaridae	NA	NA
MN357761.1	Scutacaridae sp. BOLD:ACZ4881 voucher BIOUG33046-B05 cytochrome oxidase subunit 1 (COI) gene, partial cds; mitochondrial	Metazoa	Arthropoda	Arachnida	Trombidiformes	Scutacaridae	NA	NA
MN357832.1	Scutacaridae sp. BOLD:ADI4824 voucher BIOUG35908-B02 cytochrome oxidase subunit 1 (COI) gene, partial cds; mitochondrial	Metazoa	Arthropoda	Arachnida	Trombidiformes	Scutacaridae	NA	NA
MN357880.1	Scheloribatidae sp. BOLD:ACL4236 voucher BIOUG33781-E05 cytochrome oxidase subunit 1 (COI) gene, partial cds; mitochondrial	Metazoa	Arthropoda	Arachnida	Sarcoptiformes	Scheloribatidae	NA	NA
MN358218.1	Eupodidae sp. BOLD:ACV5502 voucher BIOUG23551-C09 cytochrome oxidase subunit 1 (COI) gene, partial cds; mitochondrial	Metazoa	Arthropoda	Arachnida	Trombidiformes	Eupodidae	NA	NA
MN358443.1	Rhagidiidae sp. BOLD:ACV4973 voucher BIOUG23551-C07 cytochrome oxidase subunit 1 (COI) gene, partial cds; mitochondrial	Metazoa	Arthropoda	Arachnida	Trombidiformes	Rhagidiidae	NA	NA
MN358517.1	Eupodidae sp. BOLD:ACF9074 voucher BIOUG33204-A07 cytochrome oxidase subunit 1 (COI) gene, partial cds; mitochondrial	Metazoa	Arthropoda	Arachnida	Trombidiformes	Eupodidae	NA	NA
MN358990.1	Eupodidae sp. BOLD:ACI9911 voucher BIOUG23551-A07 cytochrome oxidase subunit 1 (COI) gene, partial cds; mitochondrial	Metazoa	Arthropoda	Arachnida	Trombidiformes	Eupodidae	NA	NA
MN359286.1	Scutacaridae sp. BOLD:ADI4824 voucher BIOUG35706-B04 cytochrome oxidase subunit 1 (COI) gene, partial cds; mitochondrial	Metazoa	Arthropoda	Arachnida	Trombidiformes	Scutacaridae	NA	NA
MN359363.1	Oripodidae sp. BOLD:ADJ0919 voucher BIOUG35808-G01 cytochrome oxidase subunit 1 (COI) gene, partial cds; mitochondrial	Metazoa	Arthropoda	Arachnida	Sarcoptiformes	Oripodidae	NA	NA
MN359744.1	Euseius sp. JCS02 voucher BIOUG35818-E02 cytochrome oxidase subunit 1 (COI) gene, partial cds; mitochondrial	Metazoa	Arthropoda	Arachnida	Mesostigmata	Phytoseiidae	NA	NA
MN359951.1	Scheloribatidae sp. BOLD:ADH6440 voucher BIOUG33045-B09 cytochrome oxidase subunit 1 (COI) gene, partial cds; mitochondrial	Metazoa	Arthropoda	Arachnida	Sarcoptiformes	Scheloribatidae	NA	NA
MN359989.1	Eremaeidae sp. BOLD:ACK1276 voucher BIOUG35847-D07 cytochrome oxidase subunit 1 (COI) gene, partial cds; mitochondrial	Metazoa	Arthropoda	Arachnida	Sarcoptiformes	Eremaeidae	NA	NA
MN360169.1	Eupodidae sp. BOLD:ACY2510 voucher BIOUG23551-G04 cytochrome oxidase subunit 1 (COI) gene, partial cds; mitochondrial	Metazoa	Arthropoda	Arachnida	Trombidiformes	Eupodidae	NA	NA
MN360404.1	Rhagidiidae sp. BOLD:ACK6145 voucher BIOUG32888-D02 cytochrome oxidase subunit 1 (COI) gene, partial cds; mitochondrial	Metazoa	Arthropoda	Arachnida	Trombidiformes	Rhagidiidae	NA	NA
MN361126.1	Eupodidae sp. BIOUG35269-C05 cytochrome oxidase subunit 1 (COI) gene, partial cds; mitochondrial	Metazoa	Arthropoda	Arachnida	Trombidiformes	Eupodidae	NA	NA
MN361238.1	Scutacaridae sp. BIOUG34647-D04 cytochrome oxidase subunit 1 (COI) gene, partial cds; mitochondrial	Metazoa	Arthropoda	Arachnida	Trombidiformes	Scutacaridae	NA	NA
MN361342.1	Tydeidae sp. BIOUG23551-C01 cytochrome oxidase subunit 1 (COI) gene, partial cds; mitochondrial	Metazoa	Arthropoda	Arachnida	Trombidiformes	Tydeidae	NA	NA
MN361395.1	Histiostomatidae sp. BIOUG35908-D12 cytochrome oxidase subunit 1 (COI) gene, partial cds; mitochondrial	Metazoa	Arthropoda	Arachnida	Sarcoptiformes	Histiostomatidae	NA	NA
MN361993.1	Tarsonemidae sp. BIOUG33520-C08 cytochrome oxidase subunit 1 (COI) gene, partial cds; mitochondrial	Metazoa	Arthropoda	Arachnida	Trombidiformes	Tarsonemidae	NA	NA
MN362074.1	Pygmephoridae sp. BOLD:ADI4087 voucher BIOUG34666-G07 cytochrome oxidase subunit 1 (COI) gene, partial cds; mitochondrial	Metazoa	Arthropoda	Arachnida	Trombidiformes	Pygmephoridae	NA	NA
MN362889.1	Chamobates sp. BIOUG35747-B11 cytochrome oxidase subunit 1 (COI) gene, partial cds; mitochondrial	Metazoa	Arthropoda	Arachnida	Sarcoptiformes	Chamobatidae	Chamobates	NA
MN362944.1	Eupodidae sp. BIOUG23551-B01 cytochrome oxidase subunit 1 (COI) gene, partial cds; mitochondrial	Metazoa	Arthropoda	Arachnida	Trombidiformes	Eupodidae	NA	NA
MN363000.1	Achipteriidae sp. BIOUG36007-B06 cytochrome oxidase subunit 1 (COI) gene, partial cds; mitochondrial	Metazoa	Arthropoda	Arachnida	Sarcoptiformes	Achipteriidae	NA	NA
MN363314.1	Tydeidae sp. BIOUG23551-B02 cytochrome oxidase subunit 1 (COI) gene, partial cds; mitochondrial	Metazoa	Arthropoda	Arachnida	Trombidiformes	Tydeidae	NA	NA
MN363785.1	Chamobates sp. BIOUG35746-G12 cytochrome oxidase subunit 1 (COI) gene, partial cds; mitochondrial	Metazoa	Arthropoda	Arachnida	Sarcoptiformes	Chamobatidae	Chamobates	NA
MN364045.1	Eupelops terminalis voucher Eu.term-01 cytochrome oxidase subunit 1 (COI) gene, partial cds; mitochondrial	Metazoa	Arthropoda	Arachnida	Sarcoptiformes	Phenopelopidae	Eupelops	NA
MN550598.1	Heteromurus nitidus isolate CA378 cytochrome oxidase subunit I (COI) gene, partial cds; mitochondrial	Metazoa	Arthropoda	Collembola	Entomobryomorpha	Entomobryidae	NA	NA
MN550636.1	Heteromurus nitidus isolate CA374_CRO cytochrome oxidase subunit I (COI) gene, partial cds; mitochondrial	Metazoa	Arthropoda	Collembola	Entomobryomorpha	Entomobryidae	NA	NA
MN550686.1	Verhoeffiella sp. CA264 cytochrome oxidase subunit I (COI) gene, partial cds; mitochondrial	Metazoa	Arthropoda	Collembola	Entomobryomorpha	Entomobryidae	Verhoeffiella	NA
MN665798.1	Rhagidiidae sp. BOLD:AAZ4417 voucher CHARS00092-H09 cytochrome oxidase subunit 1 (COI) gene, partial cds; mitochondrial	Metazoa	Arthropoda	Arachnida	Trombidiformes	Rhagidiidae	NA	NA
MN670300.1	Mycobates conitus voucher CHARS00094-H09 cytochrome oxidase subunit 1 (COI) gene, partial cds; mitochondrial	Metazoa	Arthropoda	Arachnida	Sarcoptiformes	Mycobatidae	Mycobates	Mycobates conitus
MN674753.1	Eupodidae sp. BOLD:ADU4475 voucher CHARS00153-A11 cytochrome oxidase subunit 1 (COI) gene, partial cds; mitochondrial	Metazoa	Arthropoda	Arachnida	Trombidiformes	Eupodidae	NA	NA
MN675682.1	Hypogastruridae sp. BOLD:ADW4931 voucher CHARS00275-A02 cytochrome oxidase subunit 1 (COI) gene, partial cds; mitochondrial	Metazoa	Arthropoda	Collembola	Poduromorpha	Hypogastruridae	NA	NA
MN679896.1	Bdellidae sp. BOLD:ADS7832 voucher CHARS00277-D06 cytochrome oxidase subunit 1 (COI) gene, partial cds; mitochondrial	Metazoa	Arthropoda	Arachnida	Trombidiformes	Bdellidae	NA	NA
MN680570.1	Tydeidae sp. BOLD:ADS7833 voucher CHARS00088-H03 cytochrome oxidase subunit 1 (COI) gene, partial cds; mitochondrial	Metazoa	Arthropoda	Arachnida	Trombidiformes	Tydeidae	NA	NA
MN681032.1	Rhagidiidae sp. BOLD:ADV2301 voucher CHARS00088-D07 cytochrome oxidase subunit 1 (COI) gene, partial cds; mitochondrial	Metazoa	Arthropoda	Arachnida	Trombidiformes	Rhagidiidae	NA	NA
MN681109.1	Cunaxidae sp. BOLD:AAH0990 voucher CHARS00268-A10 cytochrome oxidase subunit 1 (COI) gene, partial cds; mitochondrial	Metazoa	Arthropoda	Arachnida	Trombidiformes	Cunaxidae	NA	NA
MN727831.1	Deuteraphorura kratochvili isolate E clone DLJ cytochrome oxidase subunit 1 (COI) gene, partial cds; mitochondrial	Metazoa	Arthropoda	Collembola	Poduromorpha	Onychiuridae	NA	NA
MT357564.1	Mesaphorura yosii voucher JPV-68_Dec_ARM3_400_Mesyos_5 cytochrome oxidase subunit 1 (COI) gene, partial cds; mitochondrial	Metazoa	Arthropoda	Collembola	Poduromorpha	Tullbergiidae	Mesaphorura	Mesaphorura yosii
MT357661.1	Folsomina onychiurina voucher JPV-19_Dec_ZET1_150_Folony_4 cytochrome oxidase subunit 1 (COI) gene, partial cds; mitochondrial	Metazoa	Arthropoda	Collembola	Entomobryomorpha	Isotomidae	Folsomina	Folsomina onychiurina
MT357745.1	Ballistura schoetti voucher JPV-165_Ballsp1_Puc_LESM_3 cytochrome oxidase subunit 1 (COI) gene, partial cds; mitochondrial	Metazoa	Arthropoda	Collembola	Entomobryomorpha	Isotomidae	Ballistura	Ballistura schoetti
MT902526.1	Parajapygidae sp. Biologic-DIPL012 voucher BMR00195 cytochrome c oxidase subunit I (COX1) gene, partial cds; mitochondrial	Metazoa	Arthropoda	Entognatha	Diplura	Parajapygidae	NA	NA
MT902579.1	Japygidae sp. Biologic-DIPL008 voucher BMR00269 cytochrome c oxidase subunit I (COX1) gene, partial cds; mitochondrial	Metazoa	Arthropoda	NA	Diplura	Japygidae	NA	NA
MT902583.1	Japygidae sp. Biologic-DIPL009 voucher BMR00274 cytochrome c oxidase subunit I (COX1) gene, partial cds; mitochondrial	Metazoa	Arthropoda	NA	Diplura	Japygidae	NA

## Sheet: Insect
Accession	Description	Kingdom	Phylum	Class	Order	Family	genus	species
AB981033.1	Graphium eurypylus pamphylus mitochondrial COI gene for cytochrome oxidase subunit I, partial cds, isolate: 69	Metazoa	Arthropoda	Insecta	Lepidoptera	Papilionidae	Graphium	Graphium eurypylus
AY557119.1	Polyommatus myrrhinus voucher MW99537 cytochrome oxidase subunit I (coI) gene, partial cds; mitochondrial	Metazoa	Arthropoda	Insecta	Lepidoptera	Lycaenidae	Polyommatus	Polyommatus myrrhinus
EF028525.1	Colletes succinctus cytochrome oxidase subunit I gene, partial cds; mitochondrial	Metazoa	Arthropoda	Insecta	Hymenoptera	Colletidae	Colletes	Colletes succinctus
EF180610.1	Blepharipa sp. fimbriataDHJ01 voucher DHJPAR0003220 cytochrome oxidase subunit 1 (COI) gene, partial cds; mitochondrial	Metazoa	Arthropoda	Insecta	Diptera	Tachinidae	Blepharipa	NA
EF518376.1	Pheidole obscurithorax voucher RA0142 cytochrome oxidase subunit I (coxI) gene, partial cds; mitochondrial	Metazoa	Arthropoda	Insecta	Hymenoptera	Formicidae	Pheidole	Pheidole obscurithorax
EF610525.1	Solenopsis sp. MU01 voucher CASENT0060709-D01 cytochrome oxidase subunit 1 (COI) gene, partial cds; mitochondrial	Metazoa	Arthropoda	Insecta	Hymenoptera	Formicidae	Solenopsis	NA
EF632375.1	Zaprionus gabonicus from Gabon cytochrome oxidase subunit I (COI) gene, partial cds; mitochondrial	Metazoa	Arthropoda	Insecta	Diptera	Drosophilidae	Zaprionus	Zaprionus gabonicus
EU253861.1	Diwaitermes kanehirae voucher BYU IGC IS125 cytochrome oxidase subunit I (COI) gene, partial cds; mitochondrial	Metazoa	Arthropoda	Insecta	Blattodea	Termitidae	Diwaitermes	Diwaitermes kanehirae
EU589107.1	Schistocerca americana haplotype 14 cytochrome oxidase subunit I (COI) pseudogene, complete sequence; nuclear copy of mitochondrial gene	Metazoa	Arthropoda	Insecta	Orthoptera	Acrididae	Schistocerca	Schistocerca americana
FJ485769.1	Theretra orpheus malgassica cytochrome oxidase subunit 1 gene, partial cds; mitochondrial	Metazoa	Arthropoda	Insecta	Lepidoptera	Sphingidae	Theretra	Theretra orpheus
GQ255183.1	Myrmica semiparasitica voucher GJ533 cytochrome oxidase subunit I (COI) gene, partial cds; mitochondrial	Metazoa	Arthropoda	Insecta	Hymenoptera	Formicidae	Myrmica	Myrmica semiparasitica
GU142295.1	Drino sp. Wood02DHJ01 voucher DHJPAR0006441 cytochrome oxidase subunit 1 (COI) gene, partial cds; mitochondrial	Metazoa	Arthropoda	Insecta	Diptera	Tachinidae	Drino	NA
GU659479.1	Heliconius erato voucher MAL-02831 cytochrome oxidase subunit 1 (COI) gene, partial cds; mitochondrial	Metazoa	Arthropoda	Insecta	Lepidoptera	Nymphalidae	Heliconius	Heliconius erato
GU662716.1	Chalcoscelides castaneipars voucher RMNH.INS.14004 cytochrome oxidase subunit 1 (COI) gene, partial cds; mitochondrial	Metazoa	Arthropoda	Insecta	Lepidoptera	Limacodidae	NA	NA
GU690553.1	Parapoynx obscuralis voucher BIOUG<CAN>:09BBELE-2601 cytochrome oxidase subunit 1 (COI) gene, partial cds; mitochondrial	Metazoa	Arthropoda	Insecta	Lepidoptera	Crambidae	Parapoynx	Parapoynx obscuralis
GU691794.1	Lepidoptera sp. BOLD:AAC7560 voucher BIOUG<CAN>:09BBLEP-00471 cytochrome oxidase subunit 1 (COI) gene, partial cds; mitochondrial	Metazoa	Arthropoda	Insecta	Lepidoptera	Lepidoptera sp.	NA	NA
GU695135.1	Periclistus pirata voucher Peri-nodul 57 cytochrome oxidase subunit 1 (COI) gene, partial cds; mitochondrial	Metazoa	Arthropoda	Insecta	Hymenoptera	Cynipidae	NA	NA
GU709823.1	Nylanderia bourbonica voucher CASENT0122485-D01 cytochrome oxidase subunit 1 (COI) gene, partial cds; mitochondrial	Metazoa	Arthropoda	Insecta	Hymenoptera	Formicidae	Nylanderia	Nylanderia bourbonica
GU711823.1	Rhyacophila sp. XZ CN5 voucher BIOUG<CAN>:02CNTLV-087 cytochrome oxidase subunit 1 (COI) gene, partial cds; mitochondrial	Metazoa	Arthropoda	Insecta	Trichoptera	Rhyacophilidae	NA	NA
HM365037.1	Ceranisus menes isolate D1625 cytochrome oxidase subunit I (COI) gene, partial cds; mitochondrial	Metazoa	Arthropoda	Insecta	Hymenoptera	Eulophidae	Ceranisus	Ceranisus menes
HM374957.1	Myrmeleon exitialis voucher BIOUG<CAN>:09BBNEU-0055 cytochrome oxidase subunit 1 (COI) gene, partial cds; mitochondrial	Metazoa	Arthropoda	Insecta	Neuroptera	Myrmeleontidae	NA	NA
HM374963.1	Dicromantispa sayi voucher BIOUG<CAN>:09BBNEU-0061 cytochrome oxidase subunit 1 (COI) gene, partial cds; mitochondrial	Metazoa	Arthropoda	Insecta	Neuroptera	Mantispidae	NA	NA
HM376276.1	Barbara herrichiana voucher BC ZSM Lep 23298 cytochrome oxidase subunit 1 (COI) gene, partial cds; mitochondrial	Metazoa	Arthropoda	Insecta	Lepidoptera	Tortricidae	NA	NA
HM376305.1	Dolerus nigratus voucher BC ZSM HYM 01190 cytochrome oxidase subunit 1 (COI) gene, partial cds; mitochondrial	Metazoa	Arthropoda	Insecta	Diptera	Tenthredinidae	Dolerus	Dolerus nigratus
HM376858.1	Pentatomidae sp. BOLD:AAG1818 voucher gvc11741-1L cytochrome oxidase subunit 1 (COI) gene, partial cds; mitochondrial	Metazoa	Arthropoda	Insecta	Hemiptera	Pentatomidae	NA	NA
HM395851.1	Smicrophylax parvula voucher 09MNKK0152 cytochrome oxidase subunit 1 (COI) gene, partial cds; mitochondrial	Metazoa	Arthropoda	Insecta	Trichoptera	Hydropsychidae	NA	NA
HM397076.1	Diolcogaster sp. jft26 voucher CNCH1701 cytochrome oxidase subunit 1 (COI) gene, partial cds; mitochondrial	Metazoa	Arthropoda	Insecta	Hymenoptera	Braconidae	Diolcogaster	NA
HM413205.1	Nilea noctuiformis voucher BIOUG<CAN>:09BBEDI-1892 cytochrome oxidase subunit 1 (COI) gene, partial cds; mitochondrial	Metazoa	Arthropoda	Insecta	Diptera	Tachinidae	Nilea	Nilea noctuiformis
HM414628.1	Mimumesa sp. BBHYE121-10 voucher BIOUG<CAN>:09BBEHY-1121 cytochrome oxidase subunit 1 (COI) gene, partial cds; mitochondrial	Metazoa	Arthropoda	Insecta	Hymenoptera	Crabronidae	Mimumesa	NA
HM417165.1	Dolichopodidae sp. BOLD:AAG9691 voucher BIOUG<CAN>:09BBDIP-0265 cytochrome oxidase subunit 1 (COI) gene, partial cds; mitochondrial	Metazoa	Arthropoda	Insecta	Diptera	Dolichopodidae	NA	NA
HM430664.1	Apanteles sp. jft12 voucher CAM0872 cytochrome oxidase subunit 1 (COI) gene, partial cds; mitochondrial	Metazoa	Arthropoda	Insecta	Hymenoptera	Braconidae	Apanteles	NA
HM573987.1	Neochrysocharis chlorogaster isolate Nchl23 cytochrome c oxidase subunit I (COI) gene, partial cds; mitochondrial	Metazoa	Arthropoda	Insecta	Hymenoptera	Eulophidae	Neochrysocharis	Neochrysocharis chlorogaster
HM881954.1	Admontia sp. CR 17 voucher INBIOCRI002412945 cytochrome oxidase subunit 1 (COI) gene, partial cds; mitochondrial	Metazoa	Arthropoda	Insecta	Diptera	Tachinidae	Admontia	NA
HM906951.1	Stamnodes affiliata voucher BIOUG<CAN>:CCGBOLD00082 cytochrome oxidase subunit 1 (COI) gene, partial cds; mitochondrial	Metazoa	Arthropoda	Insecta	Lepidoptera	Geometridae	NA	NA
HQ105245.1	Paracricotopus uliginosus voucher SOE475 cytochrome oxidase subunit 1 (COI) gene, partial cds; mitochondrial	Metazoa	Arthropoda	Insecta	Diptera	Chironomidae	Paracricotopus	Paracricotopus uliginosus
HQ106842.1	Brachymeria compsilurae voucher EE-13-1B-84 P2 cytochrome oxidase subunit 1-like (COI) gene, partial sequence; mitochondrial	Metazoa	Arthropoda	Insecta	Hymenoptera	Chalcididae	Brachymeria	Brachymeria compsilurae
HQ341514.1	Chrysobothris rugosiceps isolate CrRugo5 cytochrome oxidase subunit I (coxI) gene, partial cds; mitochondrial	Metazoa	Arthropoda	Insecta	Coleoptera	Buprestidae	Chrysobothris	Chrysobothris rugosiceps
HQ570577.1	Graphium agamemnon voucher USNM:ENT:00645960 cytochrome oxidase subunit 1 (COI) gene, partial cds; mitochondrial	Metazoa	Arthropoda	Insecta	Lepidoptera	Papilionidae	Graphium	NA
HQ582498.1	Nitidulidae sp. BOLD:AAM7628 voucher BIOUG<CAN>:09BBCOL-1334 cytochrome oxidase subunit 1 (COI) gene, partial cds; mitochondrial	Metazoa	Arthropoda	Insecta	Coleoptera	Nitidulidae	NA	NA
HQ582652.1	Saprininae sp. BOLD:AAM7792 voucher BIOUG<CAN>:10BBCOL-0155 cytochrome oxidase subunit 1 (COI) gene, partial cds; mitochondrial	Metazoa	Arthropoda	Insecta	Coleoptera	Histeridae	NA	NA
HQ582917.1	Chaoborus punctipennis voucher BIOUG<CAN>:09BBDIP-1847 cytochrome oxidase subunit 1 (COI) gene, partial cds; mitochondrial	Metazoa	Arthropoda	Insecta	Diptera	Chaoboridae	NA	NA
HQ583665.1	Glyphidocera sp. BOLD:AAM8597 voucher BIOUG<CAN>:10BBLEP-00230 cytochrome oxidase subunit 1 (COI) gene, partial cds; mitochondrial	Metazoa	Arthropoda	Insecta	Lepidoptera	Glyphidoceridae	NA	NA
HQ921999.1	Eloasa brevipennis voucher 10ANIC-02333 cytochrome oxidase subunit 1 (COI) gene, partial cds; mitochondrial	Metazoa	Arthropoda	Insecta	Lepidoptera	Limacodidae	Eloasa	Eloasa brevipennis
HQ928617.1	Solenopsis sp. BOLD:ACQ9666 voucher BIOUG<CAN>:10BBUFO-0094 cytochrome oxidase subunit 1 (COI) gene, partial cds; mitochondrial	Metazoa	Arthropoda	Insecta	Hymenoptera	Formicidae	NA	NA
HQ928660.1	Pheidole sp. BOLD:AAF6608 voucher BIOUG<CAN>:10BBUFO-0146 cytochrome oxidase subunit 1 (COI) gene, partial cds; mitochondrial	Metazoa	Arthropoda	Insecta	Hymenoptera	Formicidae	Pheidole	NA
HQ928662.1	Pheidole sp. BOLD:AAF6608 voucher BIOUG<CAN>:10BBUFO-0148 cytochrome oxidase subunit 1 (COI) gene, partial cds; mitochondrial	Metazoa	Arthropoda	Insecta	Hymenoptera	Formicidae	Pheidole	NA
HQ930249.1	Pseudapanteles sp. jft28 voucher BIOUG<CAN>:10BBHYM-1279 cytochrome oxidase subunit 1 (COI) gene, partial cds; mitochondrial	Metazoa	Arthropoda	Insecta	Hymenoptera	Braconidae	Pseudapanteles	NA
HQ930250.1	Hypoponera opaciceps voucher BIOUG<CAN>:10BBHYM-1280 cytochrome oxidase subunit 1 (COI) gene, partial cds; mitochondrial	Metazoa	Arthropoda	Insecta	Hymenoptera	Formicidae	NA	NA
HQ930374.1	Orthocentrinae sp. BBHYH662-10 voucher BIOUG<CAN>:10BBHYM-1685 cytochrome oxidase subunit 1 (COI) gene, partial cds; mitochondrial	Metazoa	Arthropoda	Insecta	Hymenoptera	Ichneumonidae	NA	NA
HQ930376.1	Orthocentrinae sp. BBHYH669-10 voucher BIOUG<CAN>:10BBHYM-1692 cytochrome oxidase subunit 1 (COI) gene, partial cds; mitochondrial	Metazoa	Arthropoda	Insecta	Hymenoptera	Ichneumonidae	NA	NA
HQ930606.1	Nephrotoma ferruginea voucher BIOUG<CAN>:09BBTIP-019 cytochrome oxidase subunit 1 (COI) gene, partial cds; mitochondrial	Metazoa	Arthropoda	Insecta	Diptera	Tipulidae	Nephrotoma	Nephrotoma ferruginea
HQ944780.1	Sciaridae sp. BOLD:AAO8564 voucher BIOUG<CAN>:10BBDIP-1047 cytochrome oxidase subunit 1 (COI) gene, partial cds; mitochondrial	Metazoa	Arthropoda	Insecta	Diptera	Sciaridae	NA	NA
HQ944845.1	Cecidomyiidae sp. BOLD:AAO7701 voucher BIOUG<CAN>:10BBDIP-1115 cytochrome oxidase subunit 1 (COI) gene, partial cds; mitochondrial	Metazoa	Arthropoda	Insecta	Diptera	Cecidomyiidae	NA	NA
HQ949894.1	Dinumma mediobrunnea voucher 10ANIC-06653 cytochrome oxidase subunit 1 (COI) gene, partial cds; mitochondrial	Metazoa	Arthropoda	Insecta	Lepidoptera	Erebidae	Dinumma	Dinumma mediobrunnea
HQ953665.1	Hypebaeus flavipes voucher BC ZSM COL 00783 cytochrome oxidase subunit 1 (COI) gene, partial cds; mitochondrial	Metazoa	Arthropoda	Insecta	Coleoptera	Melyridae	NA	NA
HQ954518.1	Bembidion decorum voucher BC ZSM COLA 00277 cytochrome oxidase subunit 1 (COI) gene, partial cds; mitochondrial	Metazoa	Arthropoda	Insecta	Coleoptera	Carabidae	NA	NA
HQ979191.1	Dolichopodidae sp. BOLD:AAN5538 voucher BIOUG<CAN>:TDWG-0883 cytochrome oxidase subunit 1 (COI) gene, partial cds; mitochondrial	Metazoa	Arthropoda	Insecta	Diptera	Dolichopodidae	NA	NA
HQ979806.1	Nephrotoma ferruginea voucher BIOUG<CAN>:10BBTIP-0014 cytochrome oxidase subunit 1 (COI) gene, partial cds; mitochondrial	Metazoa	Arthropoda	Insecta	Diptera	Tipulidae	Nephrotoma	Nephrotoma ferruginea
HQ979830.1	Nephrotoma ferruginea voucher BIOUG<CAN>:10BBTIP-0042 cytochrome oxidase subunit 1 (COI) gene, partial cds; mitochondrial	Metazoa	Arthropoda	Insecta	Diptera	Tipulidae	Nephrotoma	Nephrotoma ferruginea
HQ981868.1	Cecidomyiidae sp. TTMDI737-10 voucher BIOUG<CAN>:08TTML-1228 cytochrome oxidase subunit 1 (COI) gene, partial cds; mitochondrial	Metazoa	Arthropoda	Insecta	Diptera	Cecidomyiidae	NA	NA
HQ983885.1	Anthicidae sp. BOLD:AAL8054 voucher BIOUG<CAN>:09BBCOL-1208 cytochrome oxidase subunit 1 (COI) gene, partial cds; mitochondrial	Metazoa	Arthropoda	Insecta	Coleoptera	Anthicidae	NA	NA
HQ983977.1	Nitidulidae sp. BOLD:AAN5946 voucher BIOUG<CAN>:10BBCOL-0276 cytochrome oxidase subunit 1 (COI) gene, partial cds; mitochondrial	Metazoa	Arthropoda	Insecta	Coleoptera	Nitidulidae	NA	NA
HQ984010.1	Silvanidae sp. BOLD:AAN5967 voucher BIOUG<CAN>:10BBCOL-0315 cytochrome oxidase subunit 1 (COI) gene, partial cds; mitochondrial	Metazoa	Arthropoda	Insecta	Coleoptera	Silvanidae	NA	NA
HQ985291.1	Coquillettia albaclava voucher BIOUG<CAN>:10BBHEM-301 cytochrome oxidase subunit 1 (COI) gene, partial cds; mitochondrial	Metazoa	Arthropoda	Insecta	Hemiptera	Miridae	Coquillettia	Coquillettia albaclava
HQ985330.1	Cicadellidae sp. BOLD:AAO8349 voucher BIOUG<CAN>:10BBHEM-487 cytochrome oxidase subunit 1 (COI) gene, partial cds; mitochondrial	Metazoa	Arthropoda	Insecta	Hemiptera	Cicadellidae	NA	NA
HQ986383.1	Ellipes minuta voucher BIOUG<CAN>:09BBORTH-0079 cytochrome oxidase subunit 1 (COI) gene, partial cds; mitochondrial	Metazoa	Arthropoda	Insecta	Orthoptera	Tridactylidae	Ellipes	Ellipes minuta
HQ986453.1	Frankliniella bispinosa voucher BIOUG<CAN>:10BBTHY-0070 cytochrome oxidase subunit 1 (COI) gene, partial cds; mitochondrial	Metazoa	Arthropoda	Insecta	Thysanoptera	Thripidae	Frankliniella	Frankliniella bispinosa
JF271365.1	Hymenoptera sp. BOLD:AAH4935 voucher USNM:ENT:00680876-h cytochrome oxidase subunit 1 (COI) gene, partial cds; mitochondrial	Metazoa	Arthropoda	Insecta	Hymenoptera	Hymenoptera sp.	NA	NA
JF747296.1	Simulium jenningsi isolate PA tRNA-Cys gene, partial sequence; tRNA-Tyr gene, complete sequence; cytochrome oxidase subunit I (CoxI) gene, complete cds; tRNA-Leu gene, complete sequence; and cytochrome oxidase subunit II (CoxII) gene, partial cds; mitochondrial	Metazoa	Arthropoda	Insecta	Diptera	Simuliidae	Simulium	Simulium jenningsi
JF840276.1	Timoraca meeki voucher 10ANIC-00172 cytochrome oxidase subunit 1 (COI) gene, partial cds; mitochondrial	Metazoa	Arthropoda	Insecta	Lepidoptera	Notodontidae	Timoraca	Timoraca meeki
JF868897.1	Dolichopus sp. BBDCP533-10 voucher BIOUG<CAN>:10BBCDIP-2248 cytochrome oxidase subunit 1 (COI) gene, partial cds; mitochondrial	Metazoa	Arthropoda	Insecta	Diptera	Dolichopodidae	Dolichopus	NA
JF871096.1	Procladius sp. BOLD:AAG2646 voucher BIOUG<CAN>:10BBDIP-1211 cytochrome oxidase subunit 1 (COI) gene, partial cds; mitochondrial	Metazoa	Arthropoda	Insecta	Diptera	Chironomidae	Procladius	NA
JF871321.1	Hybotidae sp. BOLD:AAP3637 voucher BIOUG<CAN>:10BBDIP-1440 cytochrome oxidase subunit 1 (COI) gene, partial cds; mitochondrial	Metazoa	Arthropoda	Insecta	Diptera	Empidoidea	NA	NA
JF871338.1	Conioscinella triorbiculata voucher BIOUG<CAN>:10BBDIP-1458 cytochrome oxidase subunit 1 (COI) gene, partial cds; mitochondrial	Metazoa	Arthropoda	Insecta	Diptera	Chloropidae	Conioscinella	Conioscinella triorbiculata
JF871506.1	Sciaridae sp. BOLD:AAP1211 voucher BIOUG<CAN>:10BBDIP-1630 cytochrome oxidase subunit 1 (COI) gene, partial cds; mitochondrial	Metazoa	Arthropoda	Insecta	Diptera	Sciaridae	NA	NA
JF871767.1	Ceratopogonidae sp. BOLD:AAO7715 voucher BIOUG<CAN>:10BBDIP-1900 cytochrome oxidase subunit 1 (COI) gene, partial cds; mitochondrial	Metazoa	Arthropoda	Insecta	Diptera	Ceratopogonidae	NA	NA
JF871783.1	Dolichopodidae sp. BOLD:ADJ5942 voucher BIOUG<CAN>:10BBDIP-1916 cytochrome oxidase subunit 1 (COI) gene, partial cds; mitochondrial	Metazoa	Arthropoda	Insecta	Diptera	Dolichopodidae	NA	NA
JF872311.1	Sciaridae sp. BOLD:AAP1211 voucher BIOUG<CAN>:10BBDIP-0823 cytochrome oxidase subunit 1 (COI) gene, partial cds; mitochondrial	Metazoa	Arthropoda	Insecta	Diptera	Sciaridae	NA	NA
JF874344.1	Phronia sp. CJB01 voucher BIOUG<CAN>:10PROBE-08833 cytochrome oxidase subunit 1 (COI) gene, partial cds; mitochondrial	Metazoa	Arthropoda	Insecta	Diptera	Mycetophilidae	Phronia	NA
JF874346.1	Phronia sp. CJB01 voucher BIOUG<CAN>:10PROBE-08835 cytochrome oxidase subunit 1 (COI) gene, partial cds; mitochondrial	Metazoa	Arthropoda	Insecta	Diptera	Mycetophilidae	Phronia	NA
JF874984.1	Ochlerotatus nigripes voucher BIOUG<CAN>:10PROBE-10359 cytochrome oxidase subunit 1 (COI) gene, partial cds; mitochondrial	Metazoa	Arthropoda	Insecta	Diptera	Culicidae	Ochlerotatus	Ochlerotatus nigripes
JF875056.1	Dictya sp. TAW1 voucher BIOUG<CAN>:10PROBE-10448 cytochrome oxidase subunit 1 (COI) gene, partial cds; mitochondrial	Metazoa	Arthropoda	Insecta	Diptera	Sciomyzidae	Dictya	NA
JF876898.1	Phronia sp. CJB01 voucher BIOUG<CAN>:10PROBE-12888 cytochrome oxidase subunit 1 (COI) gene, partial cds; mitochondrial	Metazoa	Arthropoda	Insecta	Diptera	Mycetophilidae	Phronia	NA
JF889034.1	Coleoptera sp. BOLD:AAQ3406 cytochrome oxidase subunit 1 (COI) gene, partial cds; mitochondrial	Metazoa	Arthropoda	Insecta	Coleoptera	Coleoptera sp.	NA	NA
JN170980.1	Bembidarenas reicheellum voucher DRMaddison:DNA2213 cytochrome oxidase subunit 1 (COI) gene, partial cds; mitochondrial	Metazoa	Arthropoda	Insecta	Coleoptera	Carabidae	Bembidarenas	Bembidarenas reicheellum
JN200547.1	Heteroplectron americanum voucher EPA867 cytochrome oxidase subunit 1 (COI) gene, partial cds; mitochondrial	Metazoa	Arthropoda	Insecta	Trichoptera	Calamoceratidae	Heteroplectron	Heteroplectron americanum
JN267269.1	Amelora idiomorpha voucher 11ANIC-00255 cytochrome oxidase subunit 1 (COI) gene, partial cds; mitochondrial	Metazoa	Arthropoda	Insecta	Lepidoptera	Geometridae	Amelora	Amelora idiomorpha
JN267392.1	Thalaina clara voucher 11ANIC-02167 cytochrome oxidase subunit 1 (COI) gene, partial cds; mitochondrial	Metazoa	Arthropoda	Insecta	Lepidoptera	Geometridae	Thalaina	Thalaina clara
JN277194.1	Hymenoptera sp. BOLD:AAU1891 voucher CASENT0156715-D01 cytochrome oxidase subunit 1 (COI) gene, partial cds; mitochondrial	Metazoa	Arthropoda	Insecta	Hymenoptera	Hymenoptera sp.	NA	NA
JN283564.1	Tetramorium cognatum voucher CASENT0497640-D01 cytochrome oxidase subunit 1 (COI) gene, partial cds; mitochondrial	Metazoa	Arthropoda	Insecta	Hymenoptera	Formicidae	NA	NA
JN291185.1	Diptera sp. BOLD:AAU4698 voucher BIOUG<CAN>:10BBCDIP-3084 cytochrome oxidase subunit 1 (COI) gene, partial cds; mitochondrial	Metazoa	Arthropoda	Insecta	Diptera	Lauxaniidae	Homoneura	Homoneura philadelphica
JN291267.1	Diptera sp. BOLD:AAV5618 voucher BIOUG<CAN>:10BBCDIP-3169 cytochrome oxidase subunit 1 (COI) gene, partial cds; mitochondrial	Metazoa	Arthropoda	Insecta	Diptera	Cecidomyiidae	NA	NA
JN298269.1	Coleoptera sp. BOLD:AAH2421 voucher gvc15631-1L cytochrome oxidase subunit 1 (COI) gene, partial cds; mitochondrial	Metazoa	Arthropoda	Insecta	Coleoptera	Coleoptera sp.	NA	NA
JN305855.1	Lepidoptera sp. BOLD:AAB3170 voucher BIOUG<CAN>:MDOK-4271 cytochrome oxidase subunit 1 (COI) gene, partial cds; mitochondrial	Metazoa	Arthropoda	Insecta	Lepidoptera	Lepidoptera sp.	NA	NA
JQ182146.1	Frankliniella bispinosa isolate FBFPF1 cytochrome oxidase subunit I (COI) gene, partial cds; mitochondrial	Metazoa	Arthropoda	Insecta	Thysanoptera	Thripidae	Frankliniella	Frankliniella bispinosa
JQ531234.1	Tortricidae gen. tortJanzen01 sp. Janzen01 cytochrome oxidase subunit 1 (COI) gene, partial cds; mitochondrial	Metazoa	Arthropoda	Insecta	Lepidoptera	Tortricidae	NA	NA
JQ531736.1	Choreutidae gen. chorJanzen01 sp. Janzen01 cytochrome oxidase subunit 1 (COI) gene, partial cds; mitochondrial	Metazoa	Arthropoda	Insecta	Lepidoptera	Choreutidae	Choreutidae gen. chorJanzen01	NA
JQ548113.1	Eueides sp. alipheraDHJ01 cytochrome oxidase subunit 1 (COI) gene, partial cds; mitochondrial	Metazoa	Arthropoda	Insecta	Lepidoptera	Nymphalidae	Eueides	NA
JQ553982.1	Megalopyge sp. Janzen06 cytochrome oxidase subunit 1 (COI) gene, partial cds; mitochondrial	Metazoa	Arthropoda	Insecta	Lepidoptera	Megalopygidae	Megalopyge	NA
JQ568455.1	Noctuidae gen. noctBioLep01 sp. BioLep266 cytochrome oxidase subunit 1 (COI) gene, partial cds; mitochondrial	Metazoa	Arthropoda	Insecta	Lepidoptera	Noctuidae	NA	NA
JQ808432.1	Ganaspis sp. 2 TAS-2012 strain G2Atl cytochrome oxidase subunit 1 (COI) gene, partial cds; mitochondrial	Metazoa	Arthropoda	Insecta	Hymenoptera	Figitidae	Ganaspis	NA
KC132752.1	Alisalia sp. ZMUN 10029195 cytochrome oxidase subunit 1 (CO1) gene, partial cds; tRNA-Leu (Leu2) gene, complete sequence; and cytochrome oxidase subunit 2 (CO2) gene, partial cds; mitochondrial	Metazoa	Arthropoda	Insecta	Coleoptera	Staphylinidae	Alisalia	NA
KC160230.1	Blaps bifurcata strauchi voucher Bl.11.1 cytochrome c oxidase subunit I gene, partial cds; mitochondrial	Metazoa	Arthropoda	Insecta	Coleoptera	Tenebrionidae	Blaps	Blaps bifurcata
KC182318.1	Eucharitidae sp. ASEUA024-11 cytochrome oxidase subunit 1 (COI) gene, partial cds; mitochondrial	Metazoa	Arthropoda	Insecta	Hymenoptera	Eucharitidae	NA	NA
KC975669.1	Tenthredo xanthopleurita voucher DEIGisHym4877 cytochrome oxidase subunit 1 (COI) gene, partial cds; mitochondrial	Metazoa	Arthropoda	Insecta	Hymenoptera	Tenthredinidae	Tenthredo	Tenthredo xanthopleurita
KC975710.1	Tenthredopsis sp. 004 nr. corcyrensis IL voucher DEIGISHym18573 cytochrome oxidase subunit 1 (COI) gene, partial cds; mitochondrial	Metazoa	Arthropoda	Insecta	Hymenoptera	Tenthredinidae	Tenthredopsis	NA
KF397528.1	Thysanocrepis sp. ANIC1 voucher 11ANIC-12266 cytochrome oxidase subunit 1 (COI) gene, partial cds; mitochondrial	Metazoa	Arthropoda	Insecta	Lepidoptera	Tortricidae	Thysanocrepis	NA
KF403823.1	Philobota haplogramma voucher CCDB-15800-C10 cytochrome oxidase subunit 1 (COI) gene, partial cds; mitochondrial	Metazoa	Arthropoda	Insecta	Lepidoptera	Oecophoridae	Philobota	Philobota haplogramma
KF404888.1	Chrysonoma sp. ANIC13 voucher CCDB-15767-A05 cytochrome oxidase subunit 1 (COI) gene, partial cds; mitochondrial	Metazoa	Arthropoda	Insecta	Lepidoptera	Oecophoridae	Chrysonoma	NA
KF492185.1	Zeuzerinae sp. BOLD:AAY5999 voucher AYK-04-0779-06 cytochrome oxidase subunit 1 (COI) gene, partial cds; mitochondrial	Metazoa	Arthropoda	Insecta	Lepidoptera	Cossidae	NA	NA
KF639323.1	Cinara pinimaritimae voucher INRA CBGP ACOE2017/chasses2017-ACDA cytochrome oxidase subunit 1 (COI) gene, partial cds; mitochondrial	Metazoa	Arthropoda	Insecta	Hemiptera	Lachnidae	Cinara	Cinara pinimaritimae
KF808707.1	Coleophora sp. JFL076 voucher CNCLEP00004218 cytochrome oxidase subunit 1 (COI) gene, partial cds; mitochondrial	Metazoa	Arthropoda	Insecta	Lepidoptera	Coleophoridae	Coleophora	NA
KJ012883.1	Acraephnes nitida voucher ANIC Gen No. 004339 cytochrome oxidase subunit 1 (COI) gene, partial cds; mitochondrial	Metazoa	Arthropoda	Insecta	Lepidoptera	Oecophoridae	Acraephnes	Acraephnes nitida
KJ085216.1	Dolichopodidae sp. BOLD:AAN5538 voucher BIOUG02992-E11 cytochrome oxidase subunit 1 (COI) gene, partial cds; mitochondrial	Metazoa	Arthropoda	Insecta	Diptera	Dolichopodidae	NA	NA
KJ085301.1	Dolichopodidae sp. BOLD:ABV8935 voucher BIOUG03269-F07 cytochrome oxidase subunit 1 (COI) gene, partial cds; mitochondrial	Metazoa	Arthropoda	Insecta	Diptera	Dolichopodidae	NA	NA
KJ094982.1	Colletes squamosus voucher C-1496291 cytochrome oxidase subunit I (COI) gene, partial cds; mitochondrial	Metazoa	Arthropoda	Insecta	Hymenoptera	Colletidae	Colletes	Colletes squamosus
KJ164949.1	Oxyethira pallida voucher BIOUG03566-A06 cytochrome oxidase subunit 1 (COI) gene, partial cds; mitochondrial	Metazoa	Arthropoda	Insecta	Trichoptera	Hydroptilidae	Oxyethira	Oxyethira pallida
KJ208074.1	Cecidomyiidae sp. BOLD:ACB0241 voucher BIOUG03829-G12 cytochrome oxidase subunit 1 (COI) gene, partial cds; mitochondrial	Metazoa	Arthropoda	Insecta	Diptera	Cecidomyiidae	NA	NA
KJ443829.1	Dolichopodidae sp. BOLD:AAM6786 voucher BIOUG03689-D09 cytochrome oxidase subunit 1 (COI) gene, partial cds; mitochondrial	Metazoa	Arthropoda	Insecta	Diptera	Dolichopodidae	NA	NA
KJ445630.1	Cecidomyiidae sp. BOLD:ACA8027 voucher BIOUG03823-G05 cytochrome oxidase subunit 1 (COI) gene, partial cds; mitochondrial	Metazoa	Arthropoda	Insecta	Diptera	Cecidomyiidae	NA	NA
KJ530609.1	Phenacoccus parvus voucher 1200885 cytochrome oxidase subunit I (COI) gene, partial cds; mitochondrial	Metazoa	Arthropoda	Insecta	Hemiptera	Pseudococcidae	Phenacoccus	Phenacoccus parvus
KJ677732.1	Alticini sp. 132 BT-2014 voucher BT_0353 cytochrome c oxidase subunit 1 (COI) gene, partial cds; mitochondrial	Metazoa	Arthropoda	Insecta	Coleoptera	Chrysomelidae	NA	NA
KJ702464.1	Greenidea psidii voucher ROGfAp14-14 cytochrome c oxidase subunit 1 (cox1) gene, partial cds; mitochondrial	Metazoa	Arthropoda	Insecta	Hemiptera	Greenideidae	Greenidea	Greenidea psidii
KJ961869.1	Omalium littorale voucher ZMUO<FIN>:003357 cytochrome oxidase subunit 1 (COI) gene, partial cds; mitochondrial	Metazoa	Arthropoda	Insecta	Coleoptera	Staphylinidae	Omalium	Omalium littorale
KJ962206.1	Selatosomus melancholicus voucher ZMUO<FIN>:001548 cytochrome oxidase subunit 1 (COI) gene, partial cds; mitochondrial	Metazoa	Arthropoda	Insecta	Coleoptera	Elateridae	Selatosomus	Selatosomus melancholicus
KJ965028.1	Hydrosmecta longula voucher ZMUO<FIN>:007815 cytochrome oxidase subunit 1 (COI) gene, partial cds; mitochondrial	Metazoa	Arthropoda	Insecta	Coleoptera	Staphylinidae	Hydrosmecta	Hydrosmecta longula
KM012928.1	Asterocampa leilia voucher NW82-15 cytochrome c oxidase subunit I (COI) gene, partial cds; mitochondrial	Metazoa	Arthropoda	Insecta	Lepidoptera	Nymphalidae	Asterocampa	Asterocampa leilia
KM022553.1	Macrodema microptera voucher EUBUG_342_m_Macrmicr1 cytochrome oxidase subunit 1 (COI) gene, partial cds; mitochondrial	Metazoa	Arthropoda	Insecta	Hemiptera	Rhyparochromidae	Macrodema	Macrodema microptera
KM225348.1	Chimarra acuta voucher IG3 cytochrome oxidase subunit 1 (COI) gene, partial cds; mitochondrial	Metazoa	Arthropoda	Insecta	Trichoptera	Philopotamidae	Chimarra	Chimarra acuta
KM442760.1	Aphodius coenosus voucher BFB_Col_FK_4269 cytochrome oxidase subunit 1 (COI) gene, partial cds; mitochondrial	Metazoa	Arthropoda	Insecta	Coleoptera	Scarabaeidae	Aphodius	Aphodius coenosus
KM536452.1	Coniopteryx sp. BOLD:ACC7298 voucher BIOUG03259-G06 cytochrome oxidase subunit 1 (COI) gene, partial cds; mitochondrial	Metazoa	Arthropoda	Insecta	Neuroptera	Coniopterygidae	Coniopteryx	NA
KM545776.1	Grapholita sp. BOLD:AAI5718 voucher 08BBLEP-01773 cytochrome oxidase subunit 1 (COI) gene, partial cds; mitochondrial	Metazoa	Arthropoda	Insecta	Lepidoptera	Tortricidae	Grapholita	NA
KM572337.1	Tinea trinotella voucher TLMF Lep 07966 cytochrome oxidase subunit 1 (COI) gene, partial cds; mitochondrial	Metazoa	Arthropoda	Insecta	Lepidoptera	Tineidae	Tinea	Tinea trinotella
KM612633.1	Heteroderes kusuii voucher Hkus2 cytochrome oxidase subunit 1 (COI) gene, partial cds; mitochondrial	Metazoa	Arthropoda	Insecta	Coleoptera	Elateridae	Heteroderes	Heteroderes kusuii
KM612673.1	Homotechnes motschulskyi voucher Hmizu1 cytochrome oxidase subunit 1 (COI) gene, partial cds; mitochondrial	Metazoa	Arthropoda	Insecta	Coleoptera	Elateridae	Homotechnes	Homotechnes motschulskyi
KM612823.1	Melanotus legatus voucher Mlegm4 cytochrome oxidase subunit 1 (COI) gene, partial cds; mitochondrial	Metazoa	Arthropoda	Insecta	Coleoptera	Elateridae	Melanotus	Melanotus legatus
KM842548.1	Ischalia costata voucher BIOUG03898-C08 cytochrome oxidase subunit 1 (COI) gene, partial cds; mitochondrial	Metazoa	Arthropoda	Insecta	Coleoptera	Anthicidae	Ischalia	Ischalia costata
KM843200.1	Acmaeodera pulchella voucher 08BBCOL-0154 cytochrome oxidase subunit 1 (COI) gene, partial cds; mitochondrial	Metazoa	Arthropoda	Insecta	Coleoptera	Buprestidae	Acmaeodera	Acmaeodera pulchella
KM901425.1	Mycetophila sp. BOLD:AAG4973 voucher BIOUG06585-H08 cytochrome oxidase subunit 1 (COI) gene, partial cds; mitochondrial	Metazoa	Arthropoda	Insecta	Diptera	Mycetophilidae	Mycetophila	NA
KM934636.1	Cecidomyiidae sp. BOLD:ACD1104 voucher BIOUG04246-A05 cytochrome oxidase subunit 1 (COI) gene, partial cds; mitochondrial	Metazoa	Arthropoda	Insecta	Diptera	Cecidomyiidae	NA	NA
KM966027.1	Mycetophilidae sp. BOLD:ACG3137 voucher BIOUG05244-G01 cytochrome oxidase subunit 1 (COI) gene, partial cds; mitochondrial	Metazoa	Arthropoda	Insecta	Diptera	Mycetophilidae	Mycetophilidae sp.	NA
KM966703.1	Phoridae sp. BOLD:ACB0682 voucher BIOUG06845-G12 cytochrome oxidase subunit 1 (COI) gene, partial cds; mitochondrial	Metazoa	Arthropoda	Insecta	Diptera	Phoridae	NA	NA
KM989600.1	Cecidomyiidae sp. BOLD:ACB9332 voucher BIOUG03838-B10 cytochrome oxidase subunit 1 (COI) gene, partial cds; mitochondrial	Metazoa	Arthropoda	Insecta	Diptera	Cecidomyiidae	NA	NA
KM995933.1	Hymenoptera sp. BOLD:AAG3951 voucher BIOUG02764-H10 cytochrome oxidase subunit 1 (COI) gene, partial cds; mitochondrial	Metazoa	Arthropoda	Insecta	Hymenoptera	Hymenoptera sp.	NA	NA
KM995977.1	Hymenoptera sp. ASGLE1519-10 voucher ASGLE2-0284 cytochrome oxidase subunit 1 (COI) gene, partial cds; mitochondrial	Metazoa	Arthropoda	Insecta	Hymenoptera	Hymenoptera sp.	NA	NA
KM997932.1	Hymenoptera sp. BOLD:AAF6696 voucher BIOUG02645-B08 cytochrome oxidase subunit 1 (COI) gene, partial cds; mitochondrial	Metazoa	Arthropoda	Insecta	Hymenoptera	Hymenoptera sp.	NA	NA
KP339680.1	Cinara cuneomaculata voucher CHR167 cytochrome oxidase subunit I (COI) gene, partial cds; mitochondrial	Metazoa	Arthropoda	Insecta	Hemiptera	Lachnidae	Cinara	Cinara cuneomaculata
KP421467.1	Staphylinidae sp. NZAC 03013860 voucher NZAC:03013860 cytochrome oxidase subunit I (COI) gene, partial cds; mitochondrial	Metazoa	Arthropoda	Insecta	Coleoptera	Staphylinidae	NA	NA
KP684206.1	Ctenocephalides canis voucher AL342-5 cytochrome c oxidase subunit 1 gene, partial cds; mitochondrial	Metazoa	Arthropoda	Insecta	Siphonaptera	Pulicidae	Ctenocephalides	Ctenocephalides canis
KP684209.1	Ctenocephalides canis voucher AL342-3 cytochrome c oxidase subunit 1 gene, partial cds; mitochondrial	Metazoa	Arthropoda	Insecta	Siphonaptera	Pulicidae	Ctenocephalides	Ctenocephalides canis
KR028096.1	Mimeoma maculata voucher WICH Wickell 2012 014 cytochrome oxidase subunit 1 gene, partial cds; mitochondrial	Metazoa	Arthropoda	Insecta	Coleoptera	Scarabaeidae	Mimeoma	Mimeoma maculata
KR035951.1	Tropidosteptes amoenus voucher BIOUG01487-H11 cytochrome oxidase subunit 1 (COI) gene, partial cds; mitochondrial	Metazoa	Arthropoda	Insecta	Hemiptera	Miridae	Tropidosteptes	Tropidosteptes amoenus
KR141049.1	Corrodopsylla curvata curvata voucher 07PROBE-06319 cytochrome oxidase subunit 1 (COI) gene, partial cds; mitochondrial	Metazoa	Arthropoda	Insecta	Siphonaptera	Hystrichopsyllidae	Corrodopsylla	Corrodopsylla curvata
KR144283.1	Haplothrips sp. BOLD-2016 voucher BIOUG07158-F06 cytochrome oxidase subunit 1 (COI) gene, partial cds; mitochondrial	Metazoa	Arthropoda	Insecta	Thysanoptera	Phlaeothripidae	Haplothrips	NA
KR242503.1	Phronia sp. BOLD:AAP6496 voucher BIOUG12694-F07 cytochrome oxidase subunit 1 (COI) gene, partial cds; mitochondrial	Metazoa	Arthropoda	Insecta	Diptera	Mycetophilidae	Phronia	NA
KR425043.1	Alticinae sp. 076 voucher BT_3345 cytochrome c oxidase subunit I (COI) gene, partial cds; mitochondrial	Metazoa	Arthropoda	Insecta	Coleoptera	Chrysomelidae	NA	NA
KR430932.1	Sciaridae sp. BOLD-2016 voucher BIOUG06166-C04 cytochrome oxidase subunit 1 (COI) gene, partial cds; mitochondrial	Metazoa	Arthropoda	Insecta	Diptera	Sciaridae	NA	NA
KR468237.1	Sciaridae sp. BOLD-2016 voucher BIOUG03558-E12 cytochrome oxidase subunit 1 (COI) gene, partial cds; mitochondrial	Metazoa	Arthropoda	Insecta	Diptera	Sciaridae	NA	NA
KR482320.1	Scraptiidae sp. BOLD-2016 voucher BIOUG07527-C09 cytochrome oxidase subunit 1 (COI) gene, partial cds; mitochondrial	Metazoa	Arthropoda	Insecta	Coleoptera	Coleoptera sp.	NA	NA
KR486104.1	Coleomegilla maculata lengi voucher Cp 2007 - 15 cytochrome oxidase subunit 1 (COI) gene, partial cds; mitochondrial	Metazoa	Arthropoda	Insecta	Coleoptera	Coccinellidae	Coleomegilla	Coleomegilla maculata
KR486228.1	Longitarsus scutellaris voucher BIOUG01484-E03 cytochrome oxidase subunit 1 (COI) gene, partial cds; mitochondrial	Metazoa	Arthropoda	Insecta	Coleoptera	Chrysomelidae	Longitarsus	Longitarsus scutellaris
KR564068.1	Leptoypha sp. BOLD-2016 voucher BIOUG06799-A05 cytochrome oxidase subunit 1 (COI) gene, partial cds; mitochondrial	Metazoa	Arthropoda	Insecta	Hemiptera	Tingidae	Leptoypha	NA
KR656683.1	Cecidomyiidae sp. BOLD-2016 voucher BIOUG01887-D06 cytochrome oxidase subunit 1 (COI) gene, partial cds; mitochondrial	Metazoa	Arthropoda	Insecta	Diptera	Cecidomyiidae	NA	NA
KR662385.1	Dolichopodidae sp. BOLD-2016 voucher BIOUG01610-H04 cytochrome oxidase subunit 1 (COI) gene, partial cds; mitochondrial	Metazoa	Arthropoda	Insecta	Diptera	Dolichopodidae	NA	NA
KR663506.1	Mycetophilinae sp. BOLD-2016 voucher BIOUG00938-C07 cytochrome oxidase subunit 1 (COI) gene, partial cds; mitochondrial	Metazoa	Arthropoda	Insecta	Diptera	Mycetophilidae	Mycetophilidae sp.	NA
KR671641.1	Dolichopodidae sp. BOLD-2016 voucher BIOUG00904-B12 cytochrome oxidase subunit 1 (COI) gene, partial cds; mitochondrial	Metazoa	Arthropoda	Insecta	Diptera	Dolichopodidae	NA	NA
KR672356.1	Dolichopus sp. BOLD-2016 voucher BIOUG01646-G01 cytochrome oxidase subunit 1 (COI) gene, partial cds; mitochondrial	Metazoa	Arthropoda	Insecta	Diptera	Dolichopodidae	Dolichopus	NA
KR742133.1	Cecidomyiidae sp. BOLD-2016 voucher BIOUG01448-D12 cytochrome oxidase subunit 1 (COI) gene, partial cds; mitochondrial	Metazoa	Arthropoda	Insecta	Diptera	Cecidomyiidae	NA	NA
KR746038.1	Cecidomyiidae sp. BOLD-2016 voucher BIOUG01449-C03 cytochrome oxidase subunit 1 (COI) gene, partial cds; mitochondrial	Metazoa	Arthropoda	Insecta	Diptera	Cecidomyiidae	NA	NA
KR746190.1	Cecidomyiidae sp. BOLD-2016 voucher BIOUG01450-A12 cytochrome oxidase subunit 1 (COI) gene, partial cds; mitochondrial	Metazoa	Arthropoda	Insecta	Diptera	Cecidomyiidae	NA	NA
KR784046.1	Helconinae sp. BOLD-2016 voucher BIOUG06546-B12 cytochrome oxidase subunit 1 (COI) gene, partial cds; mitochondrial	Metazoa	Arthropoda	Insecta	Hymenoptera	Braconidae	NA	NA
KR790518.1	Megaspilidae sp. BOLD-2016 voucher BIOUG07580-B02 cytochrome oxidase subunit 1 (COI) gene, partial cds; mitochondrial	Metazoa	Arthropoda	Insecta	Hymenoptera	Megaspilidae	NA	NA
KR883875.1	Eulophidae sp. BOLD-2016 voucher BIOUG05353-F11 cytochrome oxidase subunit 1 (COI) gene, partial cds; mitochondrial	Metazoa	Arthropoda	Insecta	Hymenoptera	Eulophidae	NA	NA
KR916796.1	Solenopsis saudiensis voucher SS KSUQ01 cytochrome oxidase subunit 1 (COI) gene, partial cds; mitochondrial	Metazoa	Arthropoda	Insecta	Hymenoptera	Formicidae	Solenopsis	Solenopsis saudiensis
KR952890.1	Cecidomyiidae sp. BOLD-2016 voucher BIOUG01883-C01 cytochrome oxidase subunit 1 (COI) gene, partial cds; mitochondrial	Metazoa	Arthropoda	Insecta	Diptera	Cecidomyiidae	NA	NA
KR957207.1	Cecidomyiidae sp. BOLD-2016 voucher BIOUG01128-G01 cytochrome oxidase subunit 1 (COI) gene, partial cds; mitochondrial	Metazoa	Arthropoda	Insecta	Diptera	Cecidomyiidae	NA	NA
KT075115.1	Trox capensis isolate TCBA01 cytochrome oxidase subunit 1 (COI) gene, partial cds; mitochondrial	Metazoa	Arthropoda	Insecta	Coleoptera	Trogidae	Phoberus	Phoberus capensis
KT138048.1	Parapoynx obscuralis voucher 2006-ONT-0753 cytochrome oxidase subunit 1 (COI) gene, partial cds; mitochondrial	Metazoa	Arthropoda	Insecta	Lepidoptera	Crambidae	Parapoynx	Parapoynx obscuralis
KT143542.1	Hydriomena californiata voucher AVBC 1189-11 cytochrome oxidase subunit 1 (COI) gene, partial cds; mitochondrial	Metazoa	Arthropoda	Insecta	Lepidoptera	Geometridae	Hydriomena	Hydriomena californiata
KT582610.1	Taractrocera psammopetra voucher MFB-10-P108 cytochrome oxidase subunit I (COI) gene, partial cds; mitochondrial	Metazoa	Arthropoda	Insecta	Lepidoptera	Hesperiidae	Taractrocera	Taractrocera psammopetra
KT733215.1	Ommatius aegyptius voucher USNM:ENT:00914111 cytochrome oxidase subunit 1 (COI) gene, partial cds; mitochondrial	Metazoa	Arthropoda	Insecta	Diptera	Asilidae	Ommatius	Ommatius aegyptius
KT733238.1	Philonicus arizonensis voucher USNM:ENT:00914146 cytochrome oxidase subunit 1 (COI) gene, partial cds; mitochondrial	Metazoa	Arthropoda	Insecta	Diptera	Asilidae	Philonicus	Philonicus arizonensis
KT988497.1	Noctuidae sp. 1309 cytochrome c oxidase subunit I (COI) gene, partial cds; mitochondrial	Metazoa	Arthropoda	Insecta	Lepidoptera	Noctuidae	NA	NA
KU318772.1	Pogonomyrmex imberbiculus voucher RAJ4227 cytochrome c oxidase subunit I (coxI) gene, partial cds; mitochondrial	Metazoa	Arthropoda	Insecta	Hymenoptera	Formicidae	Pogonomyrmex	Pogonomyrmex imberbiculus
KU496841.1	Setacera micans cytochrome oxidase subunit 1 (COI) gene, partial cds; mitochondrial	Metazoa	Arthropoda	Insecta	Diptera	Ephydridae	Setacera	Setacera micans
KU746600.1	Sarcophaga hirtipes voucher ZMUC00022828 cytochrome c oxidase subunit I (COI) gene, partial cds; mitochondrial	Metazoa	Arthropoda	Insecta	Diptera	Sarcophagidae	Sarcophaga	Sarcophaga hirtipes
KU749638.1	Cataglyphis cursor isolate RB0000530 cytochrome c oxidase subunit 1 (COI) gene, partial cds; mitochondrial	Metazoa	Arthropoda	Insecta	Hymenoptera	Formicidae	Cataglyphis	Cataglyphis cursor
KU911384.1	Meligethes reitteri voucher ZFMK-TIS-2512468 cytochrome oxidase subunit 1 (COI) gene, partial cds; mitochondrial	Metazoa	Arthropoda	Insecta	Coleoptera	Nitidulidae	Meligethes	Meligethes reitteri
KX038133.1	Pseudoeconesus hendersoni voucher NZCAD820 cytochrome oxidase subunit 1 (COI) gene, partial cds; mitochondrial	Metazoa	Arthropoda	Insecta	Trichoptera	Oeconesidae	Pseudoeconesus	Pseudoeconesus hendersoni
KX047444.1	Trichophaga tapetzella voucher BC ZSM Lep 53208 cytochrome oxidase subunit 1 (COI) gene, partial cds; mitochondrial	Metazoa	Arthropoda	Insecta	Lepidoptera	Tineidae	Trichophaga	Trichophaga tapetzella
KX048565.1	Lathronympha strigana voucher NHMO-07024 cytochrome oxidase subunit 1 (COI) gene, partial cds; mitochondrial	Metazoa	Arthropoda	Insecta	Lepidoptera	Tortricidae	Lathronympha	Lathronympha strigana
KX048745.1	Ancylis badiana voucher NHMO Lep2011.014 cytochrome oxidase subunit 1 (COI) gene, partial cds; mitochondrial	Metazoa	Arthropoda	Insecta	Lepidoptera	Tortricidae	Ancylis	Ancylis badiana
KX051822.1	Cardiocondyla emeryi voucher sc_07909 cytochrome oxidase subunit 1 (COI) gene, partial cds; mitochondrial	Metazoa	Arthropoda	Insecta	Hymenoptera	Formicidae	Cardiocondyla	Cardiocondyla emeryi
KX052005.1	Chloropidae sp. sc_05461 cytochrome oxidase subunit 1 (COI) gene, partial cds; mitochondrial	Metazoa	Arthropoda	Insecta	Diptera	Chloropidae	NA	NA
KX052295.1	Coccinellidae sp. sc_06971 cytochrome oxidase subunit 1 (COI) gene, partial cds; mitochondrial	Metazoa	Arthropoda	Insecta	Coleoptera	Coccinellidae	NA	NA
KX052760.1	Diptera sp. sc_08806 cytochrome oxidase subunit 1 (COI) gene, partial cds; mitochondrial	Metazoa	Arthropoda	Insecta	Diptera	NA	NA	NA
KX053632.1	Lepidoptera sp. sc_02389 cytochrome oxidase subunit 1 (COI) gene, partial cds; mitochondrial	Metazoa	Arthropoda	Insecta	Lepidoptera	Lepidoptera sp.	NA	NA
KX053699.1	Lepidoptera sp. sc_04583 cytochrome oxidase subunit 1 (COI) gene, partial cds; mitochondrial	Metazoa	Arthropoda	Insecta	Lepidoptera	Lepidoptera sp.	NA	NA
KX054080.1	Noctuidae sp. sc_05823 cytochrome oxidase subunit 1 (COI) gene, partial cds; mitochondrial	Metazoa	Arthropoda	Insecta	Lepidoptera	Noctuidae	NA	NA
KX055111.1	Tortricidae sp. sc_09224 cytochrome oxidase subunit 1 (COI) gene, partial cds; mitochondrial	Metazoa	Arthropoda	Insecta	Lepidoptera	Tortricidae	NA	NA
KX069353.1	Leucophenga umbratula voucher DIP128966 cytochrome oxidase subunit 1 (COI) gene, partial cds; mitochondrial	Metazoa	Arthropoda	Insecta	Diptera	Drosophilidae	Leucophenga	Leucophenga umbratula
KX102904.1	Polyplectropus sp. CNCAD_P22 cytochrome oxidase subunit 1 (COI) gene, partial cds; mitochondrial	Metazoa	Arthropoda	Insecta	Trichoptera	Polycentropodidae	Polyplectropus	NA
KX143070.1	Mastigoptila curvicornuta voucher 10OFCAD-227 cytochrome oxidase subunit 1 (COI) gene, partial cds; mitochondrial	Metazoa	Arthropoda	Insecta	Trichoptera	Glossosomatidae	Mastigoptila	Mastigoptila curvicornuta
KX144214.1	Triplectides sp. MS1326 cytochrome oxidase subunit 1 (COI) gene, partial cds; mitochondrial	Metazoa	Arthropoda	Insecta	Trichoptera	Leptoceridae	Triplectides	NA
KX291412.1	Trichoptera sp. INB0004360682 cytochrome oxidase subunit 1 (COI) gene, partial cds; mitochondrial	Metazoa	Arthropoda	Insecta	Trichoptera	NA	NA	NA
KX292307.1	Asmicridea sp. EPAVT5 cytochrome oxidase subunit 1 (COI) gene, partial cds; mitochondrial	Metazoa	Arthropoda	Insecta	Trichoptera	Hydropsychidae	Asmicridea	NA
KX292518.1	Phylloicus sp. INB0004363699 cytochrome oxidase subunit 1 (COI) gene, partial cds; mitochondrial	Metazoa	Arthropoda	Insecta	Trichoptera	Calamoceratidae	Phylloicus	NA
KX292666.1	Hydroptila thuna voucher HMCAD1211-142 cytochrome oxidase subunit 1 (COI) gene, partial cds; mitochondrial	Metazoa	Arthropoda	Insecta	Trichoptera	Hydroptilidae	Hydroptila	Hydroptila thuna
KX437734.1	Petalocephala ochracea mitochondrion, partial genome	Metazoa	Arthropoda	Insecta	Hemiptera	Cicadellidae	Petalocephala	Petalocephala ochracea
KX698134.1	Tuberaphis sp. 1 TTX-2016 cytochrome oxidase subunit I (COI) gene, partial cds; mitochondrial	Metazoa	Arthropoda	Insecta	Hemiptera	Hormaphididae	Tuberaphis	NA
KY039124.1	Callitettix sp.EMHAU-15090607 mitochondrion, complete genome	Metazoa	Arthropoda	Insecta	Hemiptera	Cercopidae	Callitettix	NA
KY085079.1	Diaspidiotus ancylus isolate 19538 cytochrome oxidase subunit 1 (COI) gene, partial cds; mitochondrial	Metazoa	Arthropoda	Insecta	Hemiptera	Diaspididae	Diaspidiotus	Diaspidiotus ancylus
KY085092.1	Diaspidiotus ancylus isolate 19555 cytochrome oxidase subunit 1 (COI) gene, partial cds; mitochondrial	Metazoa	Arthropoda	Insecta	Hemiptera	Diaspididae	Diaspidiotus	Diaspidiotus ancylus
KY085361.1	Coccus hesperidum isolate 24339 cytochrome oxidase subunit 1 (COI) gene, partial cds; mitochondrial	Metazoa	Arthropoda	Insecta	Hemiptera	Coccidae	Coccus	Coccus hesperidum
KY085374.1	Coccus hesperidum isolate 24358 cytochrome oxidase subunit 1 (COI) gene, partial cds; mitochondrial	Metazoa	Arthropoda	Insecta	Hemiptera	Coccidae	Coccus	Coccus hesperidum
KY224708.1	Coatitermes kartaboensis mitochondrion, complete genome	Metazoa	Arthropoda	Insecta	Blattodea	Termitidae	Coatitermes	Coatitermes kartaboensis
KY373109.1	Phenacoccus madeirensis voucher MJMB-00673 cytochrome oxidase subunit 1 (COI) gene, partial cds; mitochondrial	Metazoa	Arthropoda	Insecta	Hemiptera	Pseudococcidae	Phenacoccus	Phenacoccus madeirensis
KY833796.1	Phoridae sp. BIOUG02402-A01 cytochrome oxidase subunit 1 (COI) gene, partial cds; mitochondrial	Metazoa	Arthropoda	Insecta	Diptera	Phoridae	NA	NA
KY835837.1	Sciaridae sp. BIOUG02208-F04 cytochrome oxidase subunit 1 (COI) gene, partial cds; mitochondrial	Metazoa	Arthropoda	Insecta	Diptera	Sciaridae	NA	NA
KY839449.1	Eulophidae voucher BIOUG02398-D03 cytochrome oxidase subunit 1 (COI) gene, partial cds; mitochondrial	Metazoa	Arthropoda	Insecta	Hymenoptera	Eulophidae	NA	NA
KY840861.1	Scatopsidae sp. BIOUG04901-F05 cytochrome oxidase subunit 1 (COI) gene, partial cds; mitochondrial	Metazoa	Arthropoda	Insecta	Diptera	Scatopsidae	NA	NA
KY924798.1	Coccus hesperidum cytochrome c oxidase subunit I gene, partial cds; mitochondrial	Metazoa	Arthropoda	Insecta	Hemiptera	Coccidae	Coccus	Coccus hesperidum
LR828068.1	Agraylea multipunctata mitochondrial partial COI gene for cytochrome oxidase subunit 1	Metazoa	Arthropoda	Insecta	Lepidoptera	Agraylea	NA	NA
LT991363.1	Ochthebius eyrei mitochondrial partial COI gene for cytochrome oxidase subunit 1, specimen voucher IBE-AN600	Metazoa	Arthropoda	Insecta	Coleoptera	Hydraenidae	Ochthebius	Ochthebius eyrei
LT991375.1	Ochthebius gruwelli mitochondrial partial COI gene for cytochrome oxidase subunit 1, specimen voucher IBE-RA304	Metazoa	Arthropoda	Insecta	Coleoptera	Hydraenidae	Ochthebius	Ochthebius gruwelli
LT991423.1	Ochthebius grandipennis mitochondrial partial COI gene for cytochrome oxidase subunit 1, specimen voucher MNCN-AI616	Metazoa	Arthropoda	Insecta	Coleoptera	Hydraenidae	Ochthebius	Ochthebius grandipennis
MF051225.1	Aventiola pusilla isolate LBGM100726.221 cytochrome oxidase subunit I (COI) gene, partial cds; mitochondrial	Metazoa	Arthropoda	Insecta	Lepidoptera	Erebidae	NA	NA
MF129073.1	Hypena subidalis voucher MAL-00304 cytochrome oxidase subunit 1 (COI) gene, partial cds; mitochondrial	Metazoa	Arthropoda	Insecta	Lepidoptera	Erebidae	Hypena	Hypena subidalis
MF546098.1	Caeruleuptychia helena voucher MACN-Bar-Lep-ct 02214 cytochrome oxidase subunit 1 (COI) gene, partial cds; mitochondrial	Metazoa	Arthropoda	Insecta	Lepidoptera	Nymphalidae	Caeruleuptychia	Caeruleuptychia helena
MF615212.1	Hymenoptera sp. cytochrome oxidase subunit I (COI) gene, partial cds; mitochondrial	Metazoa	Arthropoda	Insecta	Hymenoptera	Hymenoptera sp.	NA	NA
MF699797.1	Cecidomyiidae sp. BIOUG20829-D08 cytochrome oxidase subunit 1 (COI) gene, partial cds; mitochondrial	Metazoa	Arthropoda	Insecta	Diptera	Cecidomyiidae	NA	NA
MF702100.1	Cecidomyiidae sp. BIOUG20947-G03 cytochrome oxidase subunit 1 (COI) gene, partial cds; mitochondrial	Metazoa	Arthropoda	Insecta	Diptera	Cecidomyiidae	NA	NA
MF747837.1	Thripinae sp. BIOUG24595-F05 cytochrome oxidase subunit 1 (COI) gene, partial cds; mitochondrial	Metazoa	Arthropoda	Insecta	Thysanoptera	Thripidae	NA	NA
MF764303.1	Cecidomyiidae sp. BIOUG17039-H11 cytochrome oxidase subunit 1 (COI) gene, partial cds; mitochondrial	Metazoa	Arthropoda	Insecta	Diptera	Cecidomyiidae	NA	NA
MF828636.1	Aphididae sp. BIOUG21286-C10 cytochrome oxidase subunit 1 (COI) gene, partial cds; mitochondrial	Metazoa	Arthropoda	Insecta	Hemiptera	Aphididae	NA	NA
MF829996.1	Ceratopogonidae sp. BIOUG21796-F05 cytochrome oxidase subunit 1 (COI) gene, partial cds; mitochondrial	Metazoa	Arthropoda	Insecta	Diptera	Ceratopogonidae	NA	NA
MF874010.1	Dolichopodidae sp. BIOUG21786-E05 cytochrome oxidase subunit 1 (COI) gene, partial cds; mitochondrial	Metazoa	Arthropoda	Insecta	Diptera	Dolichopodidae	NA	NA
MF921685.1	Euxoa satis voucher CNCNoctuoidea7629 cytochrome oxidase subunit 1 (COI) gene, partial cds; mitochondrial	Metazoa	Arthropoda	Insecta	Lepidoptera	Noctuidae	Euxoa	Euxoa satis
MG014753.1	Dysphania militaris voucher 11834 cytochrome oxidase subunit I (COI) gene, partial cds; mitochondrial	Metazoa	Arthropoda	Insecta	Lepidoptera	Geometridae	Dysphania	Dysphania militaris
MG073906.1	Orthocladiinae sp. BIOUG22770-C03 cytochrome oxidase subunit 1 (COI) gene, partial cds; mitochondrial	Metazoa	Arthropoda	Insecta	Diptera	Chironomidae	NA	NA
MG077115.1	Empididae sp. BIOUG22903-E08 cytochrome oxidase subunit 1 (COI) gene, partial cds; mitochondrial	Metazoa	Arthropoda	Insecta	Diptera	Empididae	NA	NA
MG084280.1	Dolichopodidae sp. BIOUG01406-H03 cytochrome oxidase subunit 1 (COI) gene, partial cds; mitochondrial	Metazoa	Arthropoda	Insecta	Diptera	Dolichopodidae	NA	NA
MG092237.1	Dicranomyia sp. BIOUG24298-E02 cytochrome oxidase subunit 1 (COI) gene, partial cds; mitochondrial	Metazoa	Arthropoda	Insecta	Diptera	Limoniidae	Dicranomyia	NA
MG112736.1	Cecidomyiidae sp. BIOUG01590-H11 cytochrome oxidase subunit 1 (COI) gene, partial cds; mitochondrial	Metazoa	Arthropoda	Insecta	Diptera	Cecidomyiidae	NA	NA
MG115229.1	Cecidomyiidae sp. 10JSROW-0633 cytochrome oxidase subunit 1 (COI) gene, partial cds; mitochondrial	Metazoa	Arthropoda	Insecta	Diptera	Cecidomyiidae	NA	NA
MG118005.1	Agromyzidae sp. BIOUG03069-G07 cytochrome oxidase subunit 1 (COI) gene, partial cds; mitochondrial	Metazoa	Arthropoda	Insecta	Diptera	Agromyzidae	NA	NA
MG119102.1	Cecidomyiidae sp. BARS_2016_2_111 cytochrome oxidase subunit 1 (COI) gene, partial cds; mitochondrial	Metazoa	Arthropoda	Insecta	Diptera	Cecidomyiidae	NA	NA
MG120069.1	Agromyzidae sp. BIOUG01403-H04 cytochrome oxidase subunit 1 (COI) gene, partial cds; mitochondrial	Metazoa	Arthropoda	Insecta	Diptera	Agromyzidae	NA	NA
MG124488.1	Cecidomyiidae sp. BIOUG24402-G09 cytochrome oxidase subunit 1 (COI) gene, partial cds; mitochondrial	Metazoa	Arthropoda	Insecta	Diptera	Cecidomyiidae	NA	NA
MG127020.1	Cecidomyiidae sp. BIOUG24500-B05 cytochrome oxidase subunit 1 (COI) gene, partial cds; mitochondrial	Metazoa	Arthropoda	Insecta	Diptera	Cecidomyiidae	NA	NA
MG166439.1	Nephrotoma ferruginea voucher BIOUG24298-F02 cytochrome oxidase subunit 1 (COI) gene, partial cds; mitochondrial	Metazoa	Arthropoda	Insecta	Diptera	Tipulidae	Nephrotoma	Nephrotoma ferruginea
MG175680.1	Ceratopogonidae sp. BIOUG25467-F05 cytochrome oxidase subunit 1 (COI) gene, partial cds; mitochondrial	Metazoa	Arthropoda	Insecta	Diptera	Ceratopogonidae	NA	NA
MG175960.1	Ceratopogonidae sp. BIOUG21047-D02 cytochrome oxidase subunit 1 (COI) gene, partial cds; mitochondrial	Metazoa	Arthropoda	Insecta	Diptera	Ceratopogonidae	NA	NA
MG299038.1	Tomosvaryella sp. S14MT48 cytochrome oxidase subunit 1 (COI) gene, partial cds; mitochondrial	Metazoa	Arthropoda	Insecta	Diptera	Pipunculidae	Tomosvaryella	NA
MG341764.1	Eulophidae sp. BIOUG25800-D05 cytochrome oxidase subunit 1 (COI) gene, partial cds; mitochondrial	Metazoa	Arthropoda	Insecta	Hymenoptera	Eulophidae	NA	NA
MG376247.1	Platygastridae sp. BARS_2016_77_093 mitochondrion, complete genome	Metazoa	Arthropoda	Insecta	Hymenoptera	Platygastridae	NA	NA
MG461242.1	Plesioarida walkeri voucher MTO1079 cytochrome c oxidase subunit I (COI) gene, partial cds; mitochondrial	Metazoa	Arthropoda	Insecta	Lepidoptera	Riodinidae	Plesioarida	Plesioarida walkeri
MG481650.1	Eulophidae sp. 10BBCHY-2921 cytochrome oxidase subunit 1 (COI) gene, partial cds; mitochondrial	Metazoa	Arthropoda	Insecta	Hymenoptera	Eulophidae	NA	NA
MG483219.1	Eulophidae sp. BIOUG21332-D10 cytochrome oxidase subunit 1 (COI) gene, partial cds; mitochondrial	Metazoa	Arthropoda	Insecta	Hymenoptera	Eulophidae	NA	NA
MG514396.1	Boernerina occidentalis voucher 10BBCHEM-0087 cytochrome oxidase subunit 1 (COI) gene, partial cds; mitochondrial	Metazoa	Arthropoda	Insecta	Hemiptera	Aphididae	Boernerina	graminis
MG566711.1	Monomorium sp. 1 of WW isolate ZB45110 cytochrome oxidase subunit 1 (COI) gene, partial cds; mitochondrial	Metazoa	Arthropoda	Insecta	Hymenoptera	Formicidae	Monomorium	NA
MG770230.1	Haematobia irritans irritans isolate ERU-H.irr cytochrome oxidase subunit I (COI) gene, partial cds; mitochondrial	Metazoa	Arthropoda	Insecta	Diptera	Muscidae	Haematobia	Haematobia irritans
MG836428.1	Closterocerus chamaeleon isolate HE17P1 cytochrome oxidase subunit 1 (COI) gene, partial cds; mitochondrial	Metazoa	Arthropoda	Insecta	Hymenoptera	Eulophidae	Closterocerus	Closterocerus chamaeleon
MG836440.1	Pediobius metallicus isolate J7P3 cytochrome oxidase subunit 1 (COI) gene, partial cds; mitochondrial	Metazoa	Arthropoda	Insecta	Hymenoptera	Eulophidae	Pediobius	Pediobius metallicus
MG837871.1	Phytosciara sp. bf-sci-01342 cytochrome oxidase subunit 1 (COI) gene, partial cds; mitochondrial	Metazoa	Arthropoda	Insecta	Diptera	Sciaridae	NA	NA
MG908031.1	Ourapteryx citrinata isolate IOZ_LEP_M_16687 cytochrome c oxidase subunit I (COI) gene, partial cds; mitochondrial	Metazoa	Arthropoda	Insecta	Lepidoptera	Geometridae	Ourapteryx	Ourapteryx citrinata
MG950011.1	Polypedilum sp. 15SC voucher CHAO105 cytochrome oxidase subunit 1 (COI) gene, partial cds; mitochondrial	Metazoa	Arthropoda	Insecta	Diptera	Chironomidae	NA	NA
MH020278.1	Anaspis brunnipes clone W167a-LCOJJ cytochrome oxidase subunit I (COI) gene, partial cds; mitochondrial	Metazoa	Arthropoda	Insecta	Coleoptera	Scraptiidae	NA	NA
MH020283.1	Prionus coriarius clone W115b-co1J cytochrome oxidase subunit I (COI) gene, partial cds; mitochondrial	Metazoa	Arthropoda	Insecta	Coleoptera	Cerambycidae	NA	NA
MH138951.1	Microplitis sp. Extraction187 cytochrome oxidase subunit 1 (COI) gene, partial cds; mitochondrial	Metazoa	Arthropoda	Insecta	Hymenoptera	Braconidae	Microplitis	NA
MH197437.1	Ennominae sp. ZSI LP6 isolate ZSI_LP6 cytochrome oxidase subunit 1 gene, partial cds; mitochondrial	Metazoa	Arthropoda	Insecta	Lepidoptera	Geometridae	Ennominae	NA
MH417069.1	Oditinae sp. DL14A1-0257 cytochrome oxidase subunit 1 (COI) gene, partial cds; mitochondrial	Metazoa	Arthropoda	Insecta	Lepidoptera	Lecithoceridae	NA	NA
MH449616.1	Ceraeochrysa cubana isolate Hv92 cytochrome oxidase subunit 1 (COI) gene, partial cds; mitochondrial	Metazoa	Arthropoda	Insecta	Neuroptera	Chrysopidae	NA	NA
MH550567.1	Stegana angustifoliacea isolate 2176 cytochrome oxidase subunit I gene, partial cds; mitochondrial	Metazoa	Arthropoda	Insecta	Diptera	Drosophilidae	Stegana	Stegana angustifoliacea
MH609628.1	Diodontus major voucher BC ZSM HYM 23787 cytochrome oxidase subunit 1 (COI) gene, partial cds; mitochondrial	Metazoa	Arthropoda	Insecta	Hymenoptera	Crabronidae	NA	NA
MH611099.1	Spilomena beata voucher BC ZSM HYM 13193 cytochrome oxidase subunit 1 (COI) gene, partial cds; mitochondrial	Metazoa	Arthropoda	Insecta	Hymenoptera	Crabronidae	Spilomena	Spilomena beata
MH611293.1	Bembix flavescens citrina voucher BC ZSM HYM 22296 cytochrome oxidase subunit 1 (COI) gene, partial cds; mitochondrial	Metazoa	Arthropoda	Insecta	Hymenoptera	Crabronidae	NA	NA
MH979996.1	Heterogaster behrensii cytochrome c oxidase subunit 1 gene, partial cds; mitochondrial	Metazoa	Arthropoda	Insecta	Hemiptera	Heterogastridae	NA	NA
MK070853.1	Aedes echinus cytochrome oxidase subunit 1 (COI) gene, partial cds; mitochondrial	Metazoa	Arthropoda	Insecta	Diptera	Culicidae	Aedes	NA
MK082288.1	Chrysomelidae sp. INDOBIOSYS-CCDB25606-E04 cytochrome oxidase subunit 1 (COI) gene, partial cds; mitochondrial	Metazoa	Arthropoda	Insecta	Coleoptera	Chrysomelidae	NA	NA
MK084120.1	Coccinellidae sp. INDOBIOSYS-CCDB26987-F03 cytochrome oxidase subunit 1 (COI) gene, partial cds; mitochondrial	Metazoa	Arthropoda	Insecta	Coleoptera	Coccinellidae	NA	NA
MK097616.1	Pheidole navigans isolate PH713 cytochrome c oxidase subunit I (COX1) gene, partial cds; mitochondrial	Metazoa	Arthropoda	Insecta	Hymenoptera	Formicidae	Pheidole	NA
MK119064.1	Philotrypesis pilosa isolate HIS.Female.1 cytochrome oxidase subunit I gene, partial cds; mitochondrial	Metazoa	Arthropoda	Insecta	Hymenoptera	Pteromalidae	Philotrypesis	Philotrypesis pilosa
MK277033.1	Drosophila primaeva voucher M09048 cytochrome c oxidase subunit I (COI) gene, partial cds; mitochondrial	Metazoa	Arthropoda	Insecta	Diptera	Drosophilidae	Drosophila	Drosophila primaeva
MK396371.1	Tabanus thoracinus voucher HF216 cytochrome oxidase subunit 1 (COI) gene, partial cds; mitochondrial	Metazoa	Arthropoda	Insecta	Diptera	Tabanidae	NA	NA
MK530739.1	Micranisa sp. 3 AYW-2019 voucher Mi_curti_1 cytochrome oxidase subunit I (COI) gene, partial cds; mitochondrial	Metazoa	Arthropoda	Insecta	Hymenoptera	Pteromalidae	NA	NA
MK609965.1	Curtos costipennis mitochondrion, complete genome	Metazoa	Arthropoda	Insecta	Coleoptera	Lampyridae	Curtos	Curtos costipennis
MK767382.1	Mycetophilidae sp. SG-BCISP-3316 cytochrome oxidase subunit 1 (COI) gene, partial cds; mitochondrial	Metazoa	Arthropoda	Insecta	Diptera	Mycetophilidae	Mycetophilidae sp.	NA
MK803279.1	Brachymyrmex cordemoyi cytochrome oxidase subunit 1 gene, partial cds; mitochondrial	Metazoa	Arthropoda	Insecta	Hymenoptera	Formicidae	Brachymyrmex	NA
MK936727.1	Acrolophus walsinghami voucher BAH_28362_G03 cytochrome oxidase subunit 1 (COI) gene, partial cds; mitochondrial	Metazoa	Arthropoda	Insecta	Lepidoptera	acrolophidae	Acrolophus	NA
MK992391.1	Brachymyrmex cordemoyi isolate USNM ENT 00757880 cytochrome oxidase subunit I (COI) gene, partial cds; mitochondrial	Metazoa	Arthropoda	Insecta	Hymenoptera	Formicidae	Brachymyrmex	NA
MN163115.1	Musca convexifrons cytochrome oxidase subunit I (COI) gene, partial cds; mitochondrial	Metazoa	Arthropoda	Insecta	Diptera	Muscidae	Muscidae sp.	NA
MN315226.1	Plagionotus christophi voucher APHIS PPQ S&T Otis Laboratory, Massachusetts, USA-TX16-51-01 cytochrome oxidase subunit I (COI) gene, partial cds; mitochondrial	Metazoa	Arthropoda	Insecta	Coleoptera	Cerambycidae	Plagionotus	Plagionotus christophi
MN320342.1	Aphis spiraecola voucher NIBGE APH-00453 cytochrome oxidase subunit 1 (COI) gene, partial cds; mitochondrial	Metazoa	Arthropoda	Insecta	Hemiptera	Aphididae	NA	NA
MN344507.1	Vasseletia vasseletii voucher USNM:ENT:01452349 cytochrome oxidase subunit 1 (COI) gene, partial cds; mitochondrial	Metazoa	Arthropoda	Insecta	Coleoptera	Brentidae	Vasseletia	Vasseletia vasseletii
MN408651.1	Phoridae sp. isolate UGC0008568 cytochrome oxidase subunit I (cox1) gene, partial cds; mitochondrial	Metazoa	Arthropoda	Insecta	Diptera	Phoridae	NA	NA
MN460842.1	Bradysia impatiens isolate DNAS-413-5XJP cytochrome c oxidase subunit I (COI) gene, partial cds; mitochondrial	Metazoa	Arthropoda	Insecta	Diptera	Sciaridae	NA	NA
MN520928.1	Empoasca sp. SAEVG Morph0116 cytochrome oxidase subunit I (CO1) gene, partial cds; mitochondrial	Metazoa	Arthropoda	Insecta	Hemiptera	Cicadellidae	NA	NA
MN521048.1	Cryptophilus sp. SAEVG Morph0281 cytochrome oxidase subunit I (CO1) gene, partial cds; mitochondrial	Metazoa	Arthropoda	Insecta	Coleoptera	Erotylidae	Cryptophilus	NA
MN521074.1	Cardiocondyla sp. SAEVG Morph0315 cytochrome oxidase subunit I (CO1) gene, partial cds; mitochondrial	Metazoa	Arthropoda	Insecta	Hymenoptera	Formicidae	Cardiocondyla	NA
MN644855.1	Rabdophaga rosaria isolate S456 cytochrome c oxidase subunit I gene, partial cds; mitochondrial	Metazoa	Arthropoda	Insecta	Diptera	Cecidomyiidae	NA	NA
MN713997.1	Nephrotoma tenuis isolate NtOther2 cytochrome c oxidase subunit I (COI) gene, partial cds; mitochondrial	Metazoa	Arthropoda	Insecta	Diptera	Tipulidae	NA	NA
MN868730.1	Coenosia attenuata voucher INV05122 cytochrome oxidase subunit 1 (COI) gene, partial cds; mitochondrial	Metazoa	Arthropoda	Insecta	Diptera	muscidae	Coenosia	attenuata
MT072893.1	Rhopalosiphum rufiabdominalis isolate Leg cytochrome c oxidase subunit I (COX1) gene, partial cds; mitochondrial	Metazoa	Arthropoda	Insecta	Hemiptera	Aphididae	NA	NA
MT909544.1	Solenopsis invicta isolate DAG678/a cytochrome c oxidase subunit I (COX1) gene, partial cds; mitochondrial	Metazoa	Arthropoda	Insecta	Hymenoptera	Formicidae	NA	NA
MT998309.2	Graminella nigrinota isolate a7 cytochrome c oxidase subunit I (COX1) gene, partial cds; mitochondrial	Metazoa	Arthropoda	Insecta	Hemiptera	Cicadellidae	Graminella	Graminella nigrinota
NC_046888.2	Cyphoderus albinus mitochondrion, complete genome	Metazoa	Arthropoda	Insecta	Coleoptera	Paronellidae	Cyphoderus	Cyphoderus albinus

## Sheet: Fungi
accession	description	Kingdom	Phyllum	Class	Order	Family	Genus	Species
KU144925.1	Alternaria tillandsiae strain MFLUCC 12-0383 18S ribosomal RNA gene, partial sequence; internal transcribed spacer 1, 5.8S ribosomal RNA gene, and internal transcribed spacer 2, complete sequence; and 28S ribosomal RNA gene, partial sequence	Fungi	Ascomycota	Dothideomycetes	Pleosporales	Pleosporaceae	Alternaria	Alternaria tillandsiae
MF285234.1	Cyphellophora jingdongensis strain IFRDCC 2659 internal transcribed spacer 1, partial sequence; 5.8S ribosomal RNA gene and internal transcribed spacer 2, complete sequence; and 28S ribosomal RNA gene, partial sequence	Fungi	Ascomycota	Eurotiomycetes	Chaetothyriales	Cyphellophoraceae	Cyphellophora	Cyphellophora jingdongensis
KF959777.1	Endocarpon adscendens voucher CG671 small subunit ribosomal RNA gene, partial sequence; internal transcribed spacer 1, 5.8S ribosomal RNA gene, and internal transcribed spacer 2, complete sequence; and large subunit ribosomal RNA gene, partial sequence	Fungi	Ascomycota	Eurotiomycetes	Verrucariales	Verrucariaceae	Endocarpon	Endocarpon adscendens
KJ001439.1	Entoloma flocculosum voucher Ludwig Nr. 2399 (Koll. C) internal transcribed spacer 1, partial sequence; 5.8S ribosomal RNA gene, complete sequence; and internal transcribed spacer 2, partial sequence	Fungi	Basidiomycota	Agaricomycetes	Agaricales	Entolomataceae	Entoloma	Entoloma flocculosum
MH044715.1	Fusarium lateritium isolate CDA/S/F-52 internal transcribed spacer 1, partial sequence; 5.8S ribosomal RNA gene and internal transcribed spacer 2, complete sequence; and large subunit ribosomal RNA gene, partial sequence	Fungi	Ascomycota	Sordariomycetes	Hypocreales	Nectriaceae	Fusarium	Fusarium lateritium
KF887025.1	Monosporascus cannonballus strain F-1-64 18S ribosomal RNA gene, partial sequence; internal transcribed spacer 1 and 5.8S ribosomal RNA gene, complete sequence; and internal transcribed spacer 2, partial sequence	Fungi	Ascomycota	Sordariomycetes	Nectria	Incertae sedis	Monosporascus	Monosporascus cannonballus
FJ161921.1	Mortierella elongata voucher MT150 internal transcribed spacer 1, partial sequence; 5.8S ribosomal RNA gene and internal transcribed spacer 2, complete sequence; and 28S ribosomal RNA gene, partial sequence	Fungi	Mucoromycota	Mortierellomycetes	Mortierellales	Mortierellaceae	Mortierella	Mortierella elongata
LC512831.1	Fusarium falciforme WA2 genes for 18S rRNA, ITS1, 5.8S rRNA, ITS2, 28S rRNA, partial and complete sequence	Fungi	Ascomycota	Sordariomycetes	Hypocreales	Nectriaceae	Fusarium	NA
MG820093.1	Pyrenochaeta sp. strain BYCDW20 internal transcribed spacer 1, partial sequence; 5.8S ribosomal RNA gene and internal transcribed spacer 2, complete sequence; and large subunit ribosomal RNA gene, partial sequence	Fungi	Ascomycota	Dothideomycetes	Pleosporales	Cucurbitariaceae	Pyrenochaeta	NA
MH231274.1	Rhizoctonia solani isolate CMM4690 internal transcribed spacer 1, partial sequence; 5.8S ribosomal RNA gene and internal transcribed spacer 2, complete sequence; and large subunit ribosomal RNA gene, partial sequence	Fungi	Basidiomycota	Agaricomycetes	Cantharellales	Ceratobasidiaceae	Rhizoctonia	NA
MH316146.1	Volutella consors isolate HZTS-F9 small subunit ribosomal RNA gene, partial sequence; internal transcribed spacer 1, 5.8S ribosomal RNA gene, and internal transcribed spacer 2, complete sequence; and large subunit ribosomal RNA gene, partial sequence	Fungi	Ascomycota	Sordariomycetes	Hypocreales	Nectriaceae	Volutella	NA
MK018272.1	Minimedusa sp. isolate OTU75 internal transcribed spacer 1, partial sequence; 5.8S ribosomal RNA gene and internal transcribed spacer 2, complete sequence; and large subunit ribosomal RNA gene, partial sequence	Fungi	Basidiomycota	Agaricomycetes	Cantharellales	Incertae sedis	Minimedusa	NA
MK018383.1	Parasympodiella sp. isolate OTU252 internal transcribed spacer 1, partial sequence; 5.8S ribosomal RNA gene and internal transcribed spacer 2, complete sequence; and large subunit ribosomal RNA gene, partial sequence	Fungi	Ascomycota	Sordariomycetes	Coronophorales	Scortechiniaceae	Parasympodiella	NA
MK018413.1	Preussia sp. (in: Fungi) isolate OTU374 internal transcribed spacer 1, partial sequence; 5.8S ribosomal RNA gene and internal transcribed spacer 2, complete sequence; and large subunit ribosomal RNA gene, partial sequence	Fungi	Ascomycota	Dothideomycetes	Pleosporales	Sporormiaceae	Preussia	NA
MK018551.1	Entoloma sp. isolate OTU369 internal transcribed spacer 1, partial sequence; 5.8S ribosomal RNA gene and internal transcribed spacer 2, complete sequence; and large subunit ribosomal RNA gene, partial sequence	Fungi	Basidiomycota	Agaricomycetes	Agaricales	Entolomataceae	Entoloma	NA
MK018563.1	Entoloma sp. isolate OTU414 internal transcribed spacer 1, partial sequence; 5.8S ribosomal RNA gene and internal transcribed spacer 2, complete sequence; and large subunit ribosomal RNA gene, partial sequence	Fungi	Basidiomycota	Agaricomycetes	Agaricales	Entolomataceae	Entoloma	NA
MK018895.1	Nectria sp. (in: Fungi) isolate OTU1212 5.8S ribosomal RNA gene, partial sequence; internal transcribed spacer 2, complete sequence; and large subunit ribosomal RNA gene, partial sequence	Fungi	Ascomycota	Sordariomycetes	Hypocreales	Nectriaceae	Nectria	NA
MK019021.1	Paecilomyces sp. (in: Hypocreales) isolate OTU1002 internal transcribed spacer 1, partial sequence; 5.8S ribosomal RNA gene and internal transcribed spacer 2, complete sequence; and large subunit ribosomal RNA gene, partial sequence	Fungi	Ascomycota	Sordariomycetes	Hypocreales	Clavicipitaceae	Paecilomyces	NA
MK336588.1	Sarocladium strictum strain Y. H. Yeh I0807 small subunit ribosomal RNA gene, partial sequence; internal transcribed spacer 1, 5.8S ribosomal RNA gene, and internal transcribed spacer 2, complete sequence; and large subunit ribosomal RNA gene, partial sequence	Fungi	Ascomycota	Sordariomycetes	Hypocreales	Sarocladiaceae	Sarocladium	NA
MK390483.1	Fusarium delphinoides isolate CNUFC-RD34 internal transcribed spacer 1, partial sequence; 5.8S ribosomal RNA gene and internal transcribed spacer 2, complete sequence; and large subunit ribosomal RNA gene, partial sequence	Fungi	Ascomycota	Sordariomycetes	Hypocreales	Nectriaceae	Fusarium	NA
MK530181.1	Pseudocercospora fijiensis strain Mf1 internal transcribed spacer 1, partial sequence; 5.8S ribosomal RNA gene and internal transcribed spacer 2, complete sequence; and large subunit ribosomal RNA gene, partial sequence	Fungi	Ascomycota	Dothideomycetes	Mycosphaerellales	Mycosphaerellaceae	Pseudocercospora	NA
MK595528.1	Didymella sp. isolate MBD_2809 internal transcribed spacer 1, partial sequence; 5.8S ribosomal RNA gene and internal transcribed spacer 2, complete sequence; and large subunit ribosomal RNA gene, partial sequence	Fungi	Ascomycota	Dothideomycetes	Pleosporales	Didymellaceae	Didymella	NA
MK685379.1	Lepiota eriophora voucher RITF2534 small subunit ribosomal RNA gene, partial sequence; internal transcribed spacer 1, 5.8S ribosomal RNA gene, and internal transcribed spacer 2, complete sequence; and large subunit ribosomal RNA gene, partial sequence	Fungi	Basidiomycota	Agaricomycetes	Agaricales	Agaricaceae	Lepiota	NA
MK729535.1	Lasiodiplodia pseudotheobromae isolate I.P-10 internal transcribed spacer 1, partial sequence; 5.8S ribosomal RNA gene and internal transcribed spacer 2, complete sequence; and large subunit ribosomal RNA gene, partial sequence	Fungi	Ascomycota	Dothideomycetes	Botryosphaeriales	Botryosphaeraceae	Lasiodiplodia	NA
MK761466.1	Uncultured clone OTU 524 5.8S ribosomal RNA gene, partial sequence; internal transcribed spacer 2, complete sequence; and large subunit ribosomal RNA gene, partial sequence	Fungi	Basidiomycota	NA	NA	NA	NA	NA
MK761981.1	Uncultured Hypocreales clone OTU 206 5.8S ribosomal RNA gene, partial sequence; internal transcribed spacer 2, complete sequence; and large subunit ribosomal RNA gene, partial sequence	Fungi	Ascomycota	Leotiomycetes	Hypocreales	Hypocreales sp.	NA	NA
MK884889.1	Beauveria sp. isolate LTB11 internal transcribed spacer 1, partial sequence; 5.8S ribosomal RNA gene, complete sequence; and internal transcribed spacer 2, partial sequence	Fungi	Ascomycota	Sordariomycetes	Hypocreales	Cordycipitaceae	Beauveria	NA
MK952376.1	Phialophora livistonae strain H5802 internal transcribed spacer 1, partial sequence; 5.8S ribosomal RNA gene and internal transcribed spacer 2, complete sequence; and large subunit ribosomal RNA gene, partial sequence	Fungi	Ascomycota	Eurotiomycetes	Chaetothyriales	Herpotrichiellaceae	Phialophora	NA
MN069544.1	Entoloma semilanceatum voucher NS2283 small subunit ribosomal RNA gene, partial sequence; internal transcribed spacer 1, 5.8S ribosomal RNA gene, and internal transcribed spacer 2, complete sequence; and large subunit ribosomal RNA gene, partial sequence	Fungi	Basidiomycota	Agaricomycetes	Agaricales	Entolomataceae	Entoloma	NA
MN077561.1	Cryptococcus sp. isolate P40A001 small subunit ribosomal RNA gene, partial sequence; internal transcribed spacer 1, 5.8S ribosomal RNA gene, and internal transcribed spacer 2, complete sequence; and large subunit ribosomal RNA gene, partial sequence	Fungi	Basidiomycota	Tremellomycetes	Tremellales	Cryptococcaceae	Cryptococcus	NA
MN103178.1	Toninia squalida voucher 10-0009 small subunit ribosomal RNA gene, partial sequence; internal transcribed spacer 1, 5.8S ribosomal RNA gene, and internal transcribed spacer 2, complete sequence; and large subunit ribosomal RNA gene, partial sequence	Fungi	Ascomycota	Lecanoromycetes	Lecanorales	Ramalinaceae	Toninia	NA
MN105564.1	Nectriaceae sp. isolate SL75_29c_N2 internal transcribed spacer 1, partial sequence; 5.8S ribosomal RNA gene and internal transcribed spacer 2, complete sequence; and large subunit ribosomal RNA gene, partial sequence	Fungi	Ascomycota	Sordariomycetes	Hypocreales	Nectriaceae	NA	NA
MN106340.1	Rhizoctonia solani isolate AG4 HGI TR55Rs2 small subunit ribosomal RNA gene, partial sequence; internal transcribed spacer 1, 5.8S ribosomal RNA gene, and internal transcribed spacer 2, complete sequence; and large subunit ribosomal RNA gene, partial sequence	Fungi	Basidiomycota	Agaricomycetes	Cantharellales	Ceratobasidiaceae	Rhizoctonia	NA
MN165504.1	Halosarpheia japonica culture MUT<ITA>:5112 internal transcribed spacer 1, partial sequence; 5.8S ribosomal RNA gene and internal transcribed spacer 2, complete sequence; and large subunit ribosomal RNA gene, partial sequence	Fungi	Ascomycota	Sordariomycetes	Microascales	Halosphaeriaceae	Halosarpheia	NA
MN190634.1	Rhizoctonia solani strain COUFPI201 internal transcribed spacer 1, partial sequence; 5.8S ribosomal RNA gene and internal transcribed spacer 2, complete sequence; and large subunit ribosomal RNA gene, partial sequence	Fungi	Basidiomycota	Agaricomycetes	Cantharellales	Ceratobasidiaceae	Rhizoctonia	NA
MN265930.1	Passalora sp. voucher B3.347 small subunit ribosomal RNA gene, partial sequence; internal transcribed spacer 1, 5.8S ribosomal RNA gene, and internal transcribed spacer 2, complete sequence; and large subunit ribosomal RNA gene, partial sequence	Fungi	Ascomycota	Dothideomycetes	Mycosphaerellales	Mycosphaerellaceae	Passalora	NA
MN325018.1	Didymosphaeriaceae sp. AM-2019d voucher MFLUCC 17-1510 internal transcribed spacer 1, partial sequence; 5.8S ribosomal RNA gene and internal transcribed spacer 2, complete sequence; and large subunit ribosomal RNA gene, partial sequence	Fungi	Ascomycota	Dothideomycetes	Pleosporales	Didymosphaeriaceae	NA	NA
MN341248.1	Preussia africana isolate KoRLI047300 small subunit ribosomal RNA gene, partial sequence; internal transcribed spacer 1, 5.8S ribosomal RNA gene, and internal transcribed spacer 2, complete sequence; and large subunit ribosomal RNA gene, partial sequence	Fungi	Ascomycota	Dothideomycetes	Pleosporales	Sporormiaceae	Preussia	NA
MN435377.1	Didymella glomerata isolate SDG-1 internal transcribed spacer 1, partial sequence; 5.8S ribosomal RNA gene and internal transcribed spacer 2, complete sequence; and large subunit ribosomal RNA gene, partial sequence	Fungi	Ascomycota	Dothideomycetes	Pleosporales	Didymellaceae	Didymella	NA
MN452859.1	Mortierella alpina isolate INSO1_2_22A internal transcribed spacer 1, partial sequence; 5.8S ribosomal RNA gene and internal transcribed spacer 2, complete sequence; and large subunit ribosomal RNA gene, partial sequence	Fungi	Mucoromycota	NA	NA	NA	NA	NA
MN548435.1	Fusicolla acetilerea isolate L-945/2013 internal transcribed spacer 1, partial sequence; 5.8S ribosomal RNA gene and internal transcribed spacer 2, complete sequence; and large subunit ribosomal RNA gene, partial sequence	Fungi	Ascomycota	Sordariomycetes	Hypocreales	Nectriaceae	Fusicolla	NA
MN615420.1	Alternaria alternata strain YZU 191238 18S ribosomal RNA gene, partial sequence; internal transcribed spacer 1, 5.8S ribosomal RNA gene, and internal transcribed spacer 2, complete sequence; and 28S ribosomal RNA gene, partial sequence	Fungi	Ascomycota	Dothideomycetes	Pleosporales	Pleosporaceae	Alternaria	NA
MN634039.1	Dothiorella viticola isolate IRNBS28 18S ribosomal RNA gene, partial sequence; internal transcribed spacer 1, 5.8S ribosomal RNA gene, and internal transcribed spacer 2, complete sequence; and 28S ribosomal RNA gene, partial sequence	Fungi	Ascomycota	Dothideomycetes	Botryosphaeriales	Botryosphaeraceae	Dothiorella	NA
MN644774.1	Trichoderma afroharzianum voucher research collection Farrer lab 237 internal transcribed spacer 1, partial sequence; 5.8S ribosomal RNA gene and internal transcribed spacer 2, complete sequence; and large subunit ribosomal RNA gene, partial sequence	Fungi	Ascomycota	Sordariomycetes	Hypocreales	Hypocreaceae	Trichoderma	NA
MN648210.1	Remotididymella anthropophila isolate JZB380042 small subunit ribosomal RNA gene, partial sequence; internal transcribed spacer 1, 5.8S ribosomal RNA gene, and internal transcribed spacer 2, complete sequence; and large subunit ribosomal RNA gene, partial sequence	Fungi	Ascomycota	Dothideomycetes	Pleosporales	Didymellaceae	Remotididymella	NA
MN653264.1	Colletotrichum vietnamense strain CFE-150 internal transcribed spacer 1, partial sequence; 5.8S ribosomal RNA gene and internal transcribed spacer 2, complete sequence; and large subunit ribosomal RNA gene, partial sequence	Fungi	Ascomycota	Sordariomycetes	Glomerellales	Glomerellaceae	Colletotrichum	NA
MN810148.1	Echinoderma sp. voucher KUN-HKAS 70488 small subunit ribosomal RNA gene, partial sequence; internal transcribed spacer 1, 5.8S ribosomal RNA gene, and internal transcribed spacer 2, complete sequence; and large subunit ribosomal RNA gene, partial sequence	Fungi	Basidiomycota	Agaricomycetes	Agaricales	Agaricaceae	Echinoderma	NA
MN811694.1	Exophiala pisciphila isolate SK48 small subunit ribosomal RNA gene, partial sequence; internal transcribed spacer 1, 5.8S ribosomal RNA gene, and internal transcribed spacer 2, complete sequence; and large subunit ribosomal RNA gene, partial sequence	Fungi	Ascomycota	Eurotiomycetes	Chaetothyriales	Herpotrichiellaceae	Exophiala	NA
MN817697.1	Dactylonectria novozelandica strain 4181 small subunit ribosomal RNA gene, partial sequence; internal transcribed spacer 1, 5.8S ribosomal RNA gene, and internal transcribed spacer 2, complete sequence; and large subunit ribosomal RNA gene, partial sequence	Fungi	Ascomycota	Sordariomycetes	Hypocreales	Nectriaceae	Dactylonectria	NA
MN892355.1	Stagonosporopsis sp. strain YTH-12 small subunit ribosomal RNA gene, partial sequence; internal transcribed spacer 1, 5.8S ribosomal RNA gene, and internal transcribed spacer 2, complete sequence; and large subunit ribosomal RNA gene, partial sequence	Fungi	Ascomycota	Dothideomycetes	Pleosporales	Didymellaceae	Stagonosporopsis	NA
MN957030.1	Albifimbria verrucaria isolate OTU_21 5.8S ribosomal RNA gene, partial sequence; internal transcribed spacer 2, complete sequence; and large subunit ribosomal RNA gene, partial sequence	Fungi	Ascomycota	Sordariomycetes	Hypocreales	stachybotryaceae	Albifibria	NA
MN957033.1	Ascomycota sp. isolate OTU_24 5.8S ribosomal RNA gene, partial sequence; internal transcribed spacer 2, complete sequence; and large subunit ribosomal RNA gene, partial sequence	Fungi	Ascomycota	Ascomycota	Ascomycota	Ascomycota	Ascomycota	NA
MN957091.1	Phaeosphaeriaceae sp. isolate OTU_82 5.8S ribosomal RNA gene, partial sequence; internal transcribed spacer 2, complete sequence; and large subunit ribosomal RNA gene, partial sequence	Fungi	Ascomycota	Dothideomycetes	Pleosporales	Phaeosphaeriaceae	Phaeosphaeriopsis	NA
MN957109.1	Acrocalymma fici isolate OTU_100 5.8S ribosomal RNA gene, partial sequence; internal transcribed spacer 2, complete sequence; and large subunit ribosomal RNA gene, partial sequence	Fungi	Ascomycota	Dothideomycetes	Pleosporales	Morosphaeriaceae	Acrocalymma	NA
MN957220.1	Ascomycota sp. isolate OTU_214 5.8S ribosomal RNA gene, partial sequence; internal transcribed spacer 2, complete sequence; and large subunit ribosomal RNA gene, partial sequence	Fungi	Ascomycota	Ascomycota	Ascomycota	Ascomycota	Ascomycota	NA
MN957241.1	Periconia byssoides isolate OTU_235 5.8S ribosomal RNA gene, partial sequence; internal transcribed spacer 2, complete sequence; and large subunit ribosomal RNA gene, partial sequence	Fungi	Ascomycota	Dothideomycetes	Pleosporales	Periconiaceae	Periconia	NA
MN957254.1	Tremellales sp. isolate OTU_248 5.8S ribosomal RNA gene and internal transcribed spacer 2, partial sequence	Fungi	Basidiomycota	Tremellomycetes	Tremellales	NA	NA	NA
MN957271.1	Fungal sp. isolate OTU_266 5.8S ribosomal RNA gene, partial sequence; internal transcribed spacer 2, complete sequence; and large subunit ribosomal RNA gene, partial sequence	Fungi	NA	NA	NA	NA	NA	NA
MN957296.1	Ascomycota sp. isolate OTU_291 5.8S ribosomal RNA gene, partial sequence; internal transcribed spacer 2, complete sequence; and large subunit ribosomal RNA gene, partial sequence	Fungi	Ascomycota	Ascomycota	Ascomycota	Ascomycota	Ascomycota	NA
MT150607.1	Remotididymella anthropophila isolate EA30 internal transcribed spacer 1, partial sequence; 5.8S ribosomal RNA gene and internal transcribed spacer 2, complete sequence; and large subunit ribosomal RNA gene, partial sequence	Fungi	Ascomycota	Dothideomycetes	Pleosporales	Didymellaceae	Remotididymella	NA
MT230461.1	Trichothecium roseum isolate A1027B internal transcribed spacer 1, partial sequence; 5.8S ribosomal RNA gene and internal transcribed spacer 2, complete sequence; and large subunit ribosomal RNA gene, partial sequence	Fungi	Ascomycota	Eurotiomycetes	Chaetothyriales	Trichomeriaceae	Trichomerium	NA
MT251175.1	Fusarium falciforme strain DTO 422-H8 small subunit ribosomal RNA gene, partial sequence; internal transcribed spacer 1, 5.8S ribosomal RNA gene, and internal transcribed spacer 2, complete sequence; and large subunit ribosomal RNA gene, partial sequence	Fungi	Ascomycota	Sordariomycetes	Hypocreales	Nectriaceae	Fusarium	NA
MT271823.1	Podospora bulbillosa culture MUT<ITA>:6459 internal transcribed spacer 1, partial sequence; 5.8S ribosomal RNA gene and internal transcribed spacer 2, complete sequence; and large subunit ribosomal RNA gene, partial sequence	Fungi	Ascomycota	Sordariomycetes	Sordariales	Chaetomiaceae	Podospora	NA
MT318151.1	Coccinonectria pachysandricola isolate JAC 18-79 small subunit ribosomal RNA gene, partial sequence; internal transcribed spacer 1, 5.8S ribosomal RNA gene, and internal transcribed spacer 2, complete sequence; and large subunit ribosomal RNA gene, partial sequence	Fungi	Ascomycota	Sordariomycetes	Hypocreales	Nectriaceae	Coccinonectria	NA
MT337552.1	Bipolaris cynodontis isolate D-I internal transcribed spacer 1, partial sequence; 5.8S ribosomal RNA gene and internal transcribed spacer 2, complete sequence; and large subunit ribosomal RNA gene, partial sequence	Fungi	Ascomycota	Dothideomycetes	Pleosporales	Pleosporaceae	Bipolaris	NA
MT365957.1	Mortierella elongata strain JL16 small subunit ribosomal RNA gene, partial sequence; internal transcribed spacer 1, 5.8S ribosomal RNA gene, and internal transcribed spacer 2, complete sequence; and large subunit ribosomal RNA gene, partial sequence	Fungi	Mucoromycota	NA	NA	NA	NA	NA
MT366008.1	Mortierella elongata strain JL80 internal transcribed spacer 1, partial sequence; 5.8S ribosomal RNA gene and internal transcribed spacer 2, complete sequence; and large subunit ribosomal RNA gene, partial sequence	Fungi	Mucoromycota	NA	NA	NA	NA	NA
MT447504.1	Mortierella alpina strain GFRS36 small subunit ribosomal RNA gene, partial sequence; internal transcribed spacer 1, 5.8S ribosomal RNA gene, and internal transcribed spacer 2, complete sequence; and large subunit ribosomal RNA gene, partial sequence	Fungi	Mucoromycota	NA	NA	NA	NA	NA
MT482668.1	Basidiobolus ranarum strain KU30019.1 small subunit ribosomal RNA gene, partial sequence; internal transcribed spacer 1, 5.8S ribosomal RNA gene, and internal transcribed spacer 2, complete sequence; and large subunit ribosomal RNA gene, partial sequence	Fungi	Zoopagomycota	Basidiobolomycetes	NA	NA	NA	NA
MT500871.1	Rhizoctonia solani isolate 157_10F_R_solani_AG4HGI internal transcribed spacer 1, partial sequence; 5.8S ribosomal RNA gene and internal transcribed spacer 2, complete sequence; and large subunit ribosomal RNA gene, partial sequence	Fungi	Basidiomycota	Agaricomycetes	Cantharellales	Ceratobasidiaceae	Rhizoctonia	NA
MT513087.1	Colletotrichum tropicicola strain FJ4 small subunit ribosomal RNA gene, partial sequence; internal transcribed spacer 1, 5.8S ribosomal RNA gene, and internal transcribed spacer 2, complete sequence; and large subunit ribosomal RNA gene, partial sequence	Fungi	Ascomycota	Sordariomycetes	Glomerellales	Glomerellaceae	Colletotrichum	NA
MT514520.1	Bipolaris yamadae isolate GG3 small subunit ribosomal RNA gene, partial sequence; internal transcribed spacer 1, 5.8S ribosomal RNA gene, and internal transcribed spacer 2, complete sequence; and large subunit ribosomal RNA gene, partial sequence	Fungi	Ascomycota	Dothideomycetes	Pleosporales	Pleosporaceae	Bipolaris	NA
MT529231.1	Cladosporium ramotenellum clone EF_582 small subunit ribosomal RNA gene, partial sequence; internal transcribed spacer 1, 5.8S ribosomal RNA gene, and internal transcribed spacer 2, complete sequence; and large subunit ribosomal RNA gene, partial sequence	Fungi	Ascomycota	Dothideomycetes	Cladosporiales	Cladosporiaceae	Cladosporium	NA
MT529253.1	Berkeleyomyces basicola clone EF_604 small subunit ribosomal RNA gene, partial sequence; internal transcribed spacer 1, 5.8S ribosomal RNA gene, and internal transcribed spacer 2, complete sequence; and large subunit ribosomal RNA gene, partial sequence	Fungi	Ascomycota	Saccharomycetes	Microascales	Ceratocystidaceae	Berkeleyomyces	NA
MT529891.1	Mortierella alpina clone SF_615 small subunit ribosomal RNA gene, partial sequence; internal transcribed spacer 1, 5.8S ribosomal RNA gene, and internal transcribed spacer 2, complete sequence; and large subunit ribosomal RNA gene, partial sequence	Fungi	Mucoromycota	NA	NA	NA	NA	NA
MT557510.1	Pseudopithomyces palmicola isolate RL460 internal transcribed spacer 1, partial sequence; 5.8S ribosomal RNA gene and internal transcribed spacer 2, complete sequence; and large subunit ribosomal RNA gene, partial sequence	Fungi	Ascomycota	Dothideomycetes	Pleosporales	Didymosphaeriaceae	Pseudopithomyces	NA
MT557514.1	Phoma sp. isolate RL306 internal transcribed spacer 1, partial sequence; 5.8S ribosomal RNA gene and internal transcribed spacer 2, complete sequence; and large subunit ribosomal RNA gene, partial sequence	Fungi	Ascomycota	Dothideomycetes	Pleosporales	Didymellaceae	Phoma	NA
MT573533.1	Cladosporium cladosporioides strain BFMY-2 small subunit ribosomal RNA gene, partial sequence; internal transcribed spacer 1, 5.8S ribosomal RNA gene, and internal transcribed spacer 2, complete sequence; and large subunit ribosomal RNA gene, partial sequence	Fungi	Ascomycota	Dothideomycetes	Cladosporiales	Cladosporiaceae	Cladosporium	NA
MT576416.1	Microsphaeropsis sp. strain L309 internal transcribed spacer 1, partial sequence; 5.8S ribosomal RNA gene and internal transcribed spacer 2, complete sequence; and large subunit ribosomal RNA gene, partial sequence	Fungi	Ascomycota	Dothideomycetes	Pleosporales	Didymosphaeriaceae	Microsphaeropsis	NA
MT582797.1	Epicoccum nigrum strain DUCC5757 small subunit ribosomal RNA gene, partial sequence; internal transcribed spacer 1, 5.8S ribosomal RNA gene, and internal transcribed spacer 2, complete sequence; and large subunit ribosomal RNA gene, partial sequence	Fungi	Ascomycota	Dothideomycetes	Pleosporales	Didymellaceae	Epicoccum	NA
MT606206.1	Purpureocillium sp. voucher AC31 internal transcribed spacer 1, partial sequence; 5.8S ribosomal RNA gene and internal transcribed spacer 2, complete sequence; and large subunit ribosomal RNA gene, partial sequence	Fungi	Ascomycota	Sordariomycetes	Hypocreales	Ophiocordycipitaceae	Purpureocillium	NA
MT610983.1	Fusarium oxysporum isolate F-1 internal transcribed spacer 1, partial sequence; 5.8S ribosomal RNA gene and internal transcribed spacer 2, complete sequence; and large subunit ribosomal RNA gene, partial sequence	Fungi	Ascomycota	Sordariomycetes	Hypocreales	Nectriaceae	Fusarium	NA
MT610995.1	Fusarium oxysporum isolate R-35 internal transcribed spacer 1, partial sequence; 5.8S ribosomal RNA gene and internal transcribed spacer 2, complete sequence; and large subunit ribosomal RNA gene, partial sequence	Fungi	Ascomycota	Sordariomycetes	Hypocreales	Nectriaceae	Fusarium	NA
MT614327.1	Fusarium oxysporum isolate 19yang01-01 internal transcribed spacer 1, partial sequence; 5.8S ribosomal RNA gene and internal transcribed spacer 2, complete sequence; and large subunit ribosomal RNA gene, partial sequence	Fungi	Ascomycota	Sordariomycetes	Hypocreales	Nectriaceae	Fusarium	NA
MT626618.1	Cercospora sp. strain MY49 internal transcribed spacer 1, partial sequence; 5.8S ribosomal RNA gene and internal transcribed spacer 2, complete sequence; and large subunit ribosomal RNA gene, partial sequence	Fungi	Ascomycota	Dothideomycetes	Mycosphaerellales	Mycosphaerellaceae	Cercospora	NA
MT626728.1	Acrocalymma sp. isolate MBG-BO-022 internal transcribed spacer 1, partial sequence; 5.8S ribosomal RNA gene and internal transcribed spacer 2, complete sequence; and large subunit ribosomal RNA gene, partial sequence	Fungi	Ascomycota	Dothideomycetes	Pleosporales	Morosphaeriaceae	Acrocalymma	NA
MT635195.1	Alternaria longipes isolate CasT-2 internal transcribed spacer 1, partial sequence; 5.8S ribosomal RNA gene and internal transcribed spacer 2, complete sequence; and large subunit ribosomal RNA gene, partial sequence	Fungi	Ascomycota	Dothideomycetes	Pleosporales	Pleosporaceae	Alternaria	NA
MT635292.1	Filobasidium magnum small subunit ribosomal RNA gene, partial sequence; internal transcribed spacer 1, 5.8S ribosomal RNA gene, and internal transcribed spacer 2, complete sequence; and large subunit ribosomal RNA gene, partial sequence	Fungi	Basidiomycota	Tremellomycetes	Filobasidiales	Filobasidiaceae	Filobasidium	NA
MT635296.1	Fusarium equiseti internal transcribed spacer 1, partial sequence; 5.8S ribosomal RNA gene and internal transcribed spacer 2, complete sequence; and large subunit ribosomal RNA gene, partial sequence	Fungi	Ascomycota	Sordariomycetes	Hypocreales	Nectriaceae	Fusarium	NA
MT636101.1	Basidiomycota sp. isolate MBG-BO-613 internal transcribed spacer 1, partial sequence; 5.8S ribosomal RNA gene and internal transcribed spacer 2, complete sequence; and large subunit ribosomal RNA gene, partial sequence	Fungi	Basidiomycota	NA	NA	NA	NA	NA
MT645662.1	Colletotrichum gloeosporioides strain GZCC20-0218 internal transcribed spacer 1, partial sequence; 5.8S ribosomal RNA gene and internal transcribed spacer 2, complete sequence; and large subunit ribosomal RNA gene, partial sequence	Fungi	Ascomycota	Sordariomycetes	Glomerellales	Glomerellaceae	Colletotrichum	NA
MT645944.1	Cladosporium sp. strain 18BPLE031 internal transcribed spacer 1, partial sequence; 5.8S ribosomal RNA gene and internal transcribed spacer 2, complete sequence; and large subunit ribosomal RNA gene, partial sequence	Fungi	Ascomycota	Dothideomycetes	Cladosporiales	Cladosporiaceae	Cladosporium	NA
MT908792.1	Sarcoscyphaceae sp. isolate Otu0418 small subunit ribosomal RNA gene, partial sequence; internal transcribed spacer 1 and 5.8S ribosomal RNA gene, complete sequence; and internal transcribed spacer 2, partial sequence	Fungi	Ascomycota	Pezizomycetes	Pezizales	Sarcoscyphaceae	NA	NA
NR_166334.1	Strelitziomyces knysnanus CPC 37067 ITS region; from TYPE material	Fungi	Ascomycota	Sordariomycetes	Xylariales	Anungtiomycetaceae	Strelitziomyces	NA
NR_111824.1	Phialophora livistonae CPC 19433 ITS region; from TYPE material	Fungi	Ascomycota	Eurotiomycetes	Chaetothyriales	Herpotrichiellaceae	Phialophora	Phialophora livistonae
AF540529.1	Physcia atrostriata internal transcribed spacer 1, partial sequence; 5.8S ribosomal RNA gene, and internal transcribed spacer 2, complete sequence	Fungi	Ascomycota	Lecanoromycetes	Caliciales	Physciaceae	Physcia	Physcia atrostriata
MH861003.1	Protocreopsis freycinetiae strain CBS 573.76 internal transcribed spacer 1, partial sequence; 5.8S ribosomal RNA gene and internal transcribed spacer 2, complete sequence; and large subunit ribosomal RNA gene, partial sequence	Fungi	Ascomycota	Sordariomycetes	Hypocreales	Bionectriaceae	Protocreopsis	Protocreopsis freycinetiae
KC542804.1	Rhizoctonia solani isolate Rs8 internal transcribed spacer 1, partial sequence; 5.8S ribosomal RNA gene and internal transcribed spacer 2, complete sequence; and 28S ribosomal RNA gene, partial sequence	Fungi	Basidiomycota	Agaricomycetes	Cantharellales	Ceratobasidiaceae	Rhizoctonia	Rhizoctonia solani
KU935682.1	Sedecimiella taiwanensis culture-collection MUT<ITA>:1660 18S ribosomal RNA gene, partial sequence; internal transcribed spacer 1, 5.8S ribosomal RNA gene, and internal transcribed spacer 2, complete sequence; and 28S ribosomal RNA gene, partial sequence	Fungi	Ascomycota	Sordariomycetes	Hypocreales	Incertae sedis	Sedecimiella	Sedecimiella taiwanensis
NR_132838.1	Strelitziana australiensis ITS region; from TYPE material	Fungi	Ascomycota	Eurotiomycetes	Chaetothyriales	Incertae sedis	Strelitziana	Strelitziana australiensis
NR_145400.1	Strelitziana syzygii CPC 26591 ITS region; from TYPE material	Fungi	Ascomycota	Eurotiomycetes	Chaetothyriales	Incertae sedis	Strelitziana	Strelitziana syzygii
NR_156672.1	Trichomerium eucalypti ITS region; from TYPE material	Fungi	Ascomycota	Eurotiomycetes	Chaetothyriales	Trichomeriaceae	Trichomerium	Trichomerium eucalypti
JX313653.1	Trichomerium foliicola strain MFLUCC10-0058 18S ribosomal RNA gene, partial sequence; internal transcribed spacer 1, 5.8S ribosomal RNA gene, and internal transcribed spacer 2, complete sequence; and 28S ribosomal RNA gene, partial sequence	Fungi	Ascomycota	Eurotiomycetes	Chaetothyriales	Trichomeriaceae	Trichomerium	Trichomerium foliicola
JX313656.1	Trichomerium gleosporum strain MFLUCC10-0087 18S ribosomal RNA gene, partial sequence; internal transcribed spacer 1, 5.8S ribosomal RNA gene, and internal transcribed spacer 2, complete sequence; and 28S ribosomal RNA gene, partial sequence	Fungi	Ascomycota	Eurotiomycetes	Chaetothyriales	Trichomeriaceae	Trichomerium	Trichomerium gloeosporum
KM231767.1	Volutella consors strain CBS 122767 18S ribosomal RNA gene, partial sequence; internal transcribed spacer 1, 5.8S ribosomal RNA gene, and internal transcribed spacer 2, complete sequence; and 28S ribosomal RNA gene, partial sequence	Fungi	Ascomycota	Sordariomycetes	Hypocreales	Nectriaceae	Volutella	Volutella consors
JQ693169.1	Volutella lini culture-collection CABI:IMI224502 internal transcribed spacer 1, partial sequence; 5.8S ribosomal RNA gene and internal transcribed spacer 2, complete sequence; and 28S ribosomal RNA gene, partial sequence	Fungi	Ascomycota	Sordariomycetes	Hypocreales	Nectriaceae	Volutella	Volutella lini
AF502884.1	Leaf litter ascomycete strain its399 internal transcribed spacer 1, partial sequence; 5.8S ribosomal RNA gene, complete sequence; and internal transcribed spacer 2, partial sequence	Fungi	Ascomycota	NA	NA	NA	NA	NA
AY214459.1	Aschersonia sp. isolate 8 18S ribosomal RNA gene, partial sequence; internal transcribed spacer 1, 5.8S ribosomal RNA gene and internal transcribed spacer 2, complete sequence; and 28S ribosomal RNA gene, partial sequence	Fungi	Ascomycota	Sordariomycetes	Hypocreales	Clavicipitaceae	Aschersonia	NA
AY969882.1	Uncultured Basidiomycota isolate dfmo0725_082 internal transcribed spacer 1, partial sequence; 5.8S ribosomal RNA gene and internal transcribed spacer 2, complete sequence; and 28S ribosomal RNA gene, partial sequence	Fungi	Basidiomycota	NA	NA	NA	NA	NA
EF464590.1	Phialophora sp. EHS291 internal transcribed spacer 1, partial sequence; 5.8S ribosomal RNA gene and internal transcribed spacer 2, complete sequence; and 28S ribosomal RNA gene, partial sequence	Fungi	Ascomycota	Eurotiomycetes	Chaetothyriales	Herpotrichiellaceae	Phialophora	NA
EF504401.1	Uncultured endophytic fungus clone 32-14-24 18S ribosomal RNA gene, partial sequence; internal transcribed spacer 1, 5.8S ribosomal RNA gene, and internal transcribed spacer 2, complete sequence; and 28S ribosomal RNA gene, partial sequence	Fungi	NA	NA	NA	NA	NA	NA
EF505589.1	Uncultured endophytic fungus clone 38-1-84 18S ribosomal RNA gene, partial sequence; internal transcribed spacer 1, 5.8S ribosomal RNA gene, and internal transcribed spacer 2, complete sequence; and 28S ribosomal RNA gene, partial sequence	Fungi	NA	NA	NA	NA	NA	NA
EF635811.1	clone IIS2a4 18S ribosomal RNA gene, partial sequence; internal transcribed spacer 1, 5.8S ribosomal RNA gene, and internal transcribed spacer 2, complete sequence; and 28S ribosomal RNA gene, partial sequence	Fungi	NA	NA	NA	NA	NA	NA
EU489940.1	Uncultured Ascomycota clone 4M1_H08 18S ribosomal RNA gene, partial sequence; internal transcribed spacer 1, 5.8S ribosomal RNA gene, and internal transcribed spacer 2, complete sequence; and 28S ribosomal RNA gene, partial sequence	Fungi	Ascomycota	NA	NA	NA	NA	NA
EU977268.1	Fungal endophyte sp. P1312D internal transcribed spacer 1, partial sequence; 5.8S ribosomal RNA gene, complete sequence; and internal transcribed spacer 2, partial sequence	Fungi	NA	NA	NA	NA	NA	NA
FJ626911.1	clone 09F18 18S ribosomal RNA gene, partial sequence; internal transcribed spacer 1, 5.8S ribosomal RNA gene, and internal transcribed spacer 2, complete sequence; and 28S ribosomal RNA gene, partial sequence	Fungi	NA	NA	NA	NA	NA	NA
GQ921777.1	clone RFLP type 61 18S ribosomal RNA gene, partial sequence; internal transcribed spacer 1, 5.8S ribosomal RNA gene, and internal transcribed spacer 2, complete sequence; and 28S ribosomal RNA gene, partial sequence	Fungi	NA	NA	NA	NA	NA	NA
GQ921821.1	clone RFLP type 105 18S ribosomal RNA gene, partial sequence; internal transcribed spacer 1, 5.8S ribosomal RNA gene, and internal transcribed spacer 2, complete sequence; and 28S ribosomal RNA gene, partial sequence	Fungi	NA	NA	NA	NA	NA	NA
GU910176.1	Uncultured Sordariales clone 8SC8ce04 internal transcribed spacer 1, partial sequence; 5.8S ribosomal RNA gene and internal transcribed spacer 2, complete sequence; and 28S ribosomal RNA gene, partial sequence	Fungi	Ascomycota	Sordariomycetes	Sordariales	NA	NA	NA
HM161973.1	Uncultured Ascomycota clone 1096 18S ribosomal RNA gene, partial sequence; internal transcribed spacer 1, 5.8S ribosomal RNA gene, and internal transcribed spacer 2, complete sequence; and 28S ribosomal RNA gene, partial sequence	Fungi	Ascomycota	NA	NA	NA	NA	NA
HQ389454.1	Uncultured Chaetothyriales clone 9J6S58N internal transcribed spacer 1, partial sequence; 5.8S ribosomal RNA gene, complete sequence; and internal transcribed spacer 2, partial sequence	Fungi	Ascomycota	Eurotiomycetes	Chaetothyriales	NA	NA	NA
HQ607854.1	Peniophora sp. AR-2010 isolate ATT139 18S ribosomal RNA gene, partial sequence; internal transcribed spacer 1, 5.8S ribosomal RNA gene, and internal transcribed spacer 2, complete sequence; and 28S ribosomal RNA gene, partial sequence	Fungi	Basidiomycota	Agaricomycetes	Russulales	Peniophoraceae	Peniophora	NA
JF300445.1	clone TH82 18S ribosomal RNA gene, partial sequence; internal transcribed spacer 1, 5.8S ribosomal RNA gene, and internal transcribed spacer 2, complete sequence; and 28S ribosomal RNA gene, partial sequence	Fungi	NA	NA	NA	NA	NA	NA
JF781528.1	Cryptococcus sp. SJ4L02 internal transcribed spacer 1, partial sequence; 5.8S ribosomal RNA gene and internal transcribed spacer 2, complete sequence; and 26S ribosomal RNA gene, partial sequence	Fungi	Basidiomycota	Tremellomycetes	Tremellales	Cryptococcaceae	Cryptococcus	NA
JN569131.1	Fungal sp. 1 MV-2011 strain L-Echi-B10 internal transcribed spacer 1, partial sequence; 5.8S ribosomal RNA gene, complete sequence; and internal transcribed spacer 2, partial sequence	Fungi	NA	NA	NA	NA	NA	NA
JQ081587.1	clone ABSC023 internal transcribed spacer 1, partial sequence; 5.8S ribosomal RNA gene, complete sequence; and internal transcribed spacer 2, partial sequence	Fungi	NA	NA	NA	NA	NA	NA
JQ693602.1	Sphaceloma sp. HGUP1651 internal transcribed spacer 1, partial sequence; 5.8S ribosomal RNA gene and internal transcribed spacer 2, complete sequence; and 28S ribosomal RNA gene, partial sequence	Fungi	Ascomycota	Dothideomycetes	Myriangiales	Elsinoaceae	Sphaceloma	NA
JQ989307.1	clone EMF21 II 18S ribosomal RNA gene, partial sequence; internal transcribed spacer 1, 5.8S ribosomal RNA gene, and internal transcribed spacer 2, complete sequence; and 28S ribosomal RNA gene, partial sequence	Fungi	NA	NA	NA	NA	NA	NA
JX174159.1	Eurotiomycetes sp. TC85 internal transcribed spacer 1, partial sequence; 5.8S ribosomal RNA gene and internal transcribed spacer 2, complete sequence; and 28S ribosomal RNA gene, partial sequence	Fungi	Ascomycota	Eurotiomycetes	NA	NA	NA	NA
JX327919.1	clone 107A61709 18S ribosomal RNA gene, partial sequence; internal transcribed spacer 1, complete sequence; and 5.8S ribosomal RNA gene, partial sequence	Fungi	NA	NA	NA	NA	NA	NA
KF675637.1	clone FLITS09H10 internal transcribed spacer 1, partial sequence; 5.8S ribosomal RNA gene, complete sequence; and internal transcribed spacer 2, partial sequence	Fungi	NA	NA	NA	NA	NA	NA
KF800188.1	clone CMH097 18S ribosomal RNA gene, partial sequence; internal transcribed spacer 1, 5.8S ribosomal RNA gene, and internal transcribed spacer 2, complete sequence; and 28S ribosomal RNA gene, partial sequence	Fungi	NA	NA	NA	NA	NA	NA
KJ541027.1	Phoma sp. WZS7165 internal transcribed spacer 1, partial sequence; 5.8S ribosomal RNA gene and internal transcribed spacer 2, complete sequence; and 28S ribosomal RNA gene, partial sequence	Fungi	Ascomycota	Dothideomycetes	Pleosporales	Didymellaceae	Phoma	NA
KJ701216.1	Symmetrospora pseudomarina voucher SA716 18S ribosomal RNA gene, partial sequence; internal transcribed spacer 1, 5.8S ribosomal RNA gene, and internal transcribed spacer 2, complete sequence; and 28S ribosomal RNA gene, partial sequence	Fungi	Basidiomycota	Cystobasidiomycetes	NA	Symmetrosporiaceae	Symmetrospora	NA
KP012948.1	Pouzarella sp. MEL 2382765 internal transcribed spacer 1, partial sequence; 5.8S ribosomal RNA gene and internal transcribed spacer 2, complete sequence; and large subunit ribosomal RNA gene, partial sequence	Fungi	Basidiomycota	Agaricomycetes	Agaricales	Entolomataceae	Pouzarella	NA
KP889443.1	clone SG025_C12 18S ribosomal RNA gene, partial sequence; internal transcribed spacer 1, 5.8S ribosomal RNA gene, and internal transcribed spacer 2, complete sequence; and 28S ribosomal RNA gene, partial sequence	Fungi	NA	NA	NA	NA	NA	NA
KP889475.1	clone SG039_G05 18S ribosomal RNA gene, partial sequence; internal transcribed spacer 1, 5.8S ribosomal RNA gene, and internal transcribed spacer 2, complete sequence; and 28S ribosomal RNA gene, partial sequence	Fungi	NA	NA	NA	NA	NA	NA
KR259886.1	Ceratobasidium sp. AG-A isolate R1 18S ribosomal RNA gene, partial sequence; internal transcribed spacer 1, 5.8S ribosomal RNA gene, and internal transcribed spacer 2, complete sequence; and 28S ribosomal RNA gene, partial sequence	Fungi	Basidiomycota	Agaricomycetes	Cantharellales	Ceratobasidiaceae	Ceratobasidium	NA
KT243025.1	clone Puerto_Rico_OTULB_1441 5.8S ribosomal RNA gene and internal transcribed spacer 2, partial sequence	Fungi	NA	NA	NA	NA	NA	NA
KT244041.1	clone Puerto_Rico_OTULB_1119 5.8S ribosomal RNA gene and internal transcribed spacer 2, partial sequence	Fungi	NA	NA	NA	NA	NA	NA
KT244043.1	clone Puerto_Rico_OTULB_2176 5.8S ribosomal RNA gene and internal transcribed spacer 2, partial sequence	Fungi	NA	NA	NA	NA	NA	NA
KT244087.1	clone Puerto_Rico_OTULB_10803 5.8S ribosomal RNA gene and internal transcribed spacer 2, partial sequence	Fungi	NA	NA	NA	NA	NA	NA
KT244099.1	clone Puerto_Rico_OTULB_2356 5.8S ribosomal RNA gene and internal transcribed spacer 2, partial sequence	Fungi	NA	NA	NA	NA	NA	NA
KT244183.1	clone Puerto_Rico_OTULB_1037 5.8S ribosomal RNA gene and internal transcribed spacer 2, partial sequence	Fungi	NA	NA	NA	NA	NA	NA
KT328647.1	isolate OTU 296 18S ribosomal RNA gene, partial sequence; internal transcribed spacer 1, 5.8S ribosomal RNA gene, and internal transcribed spacer 2, complete sequence; and 28S ribosomal RNA gene, partial sequence	Fungi	NA	NA	NA	NA	NA	NA
KT328723.1	isolate OTU 188 18S ribosomal RNA gene, partial sequence; internal transcribed spacer 1, 5.8S ribosomal RNA gene, and internal transcribed spacer 2, complete sequence; and 28S ribosomal RNA gene, partial sequence	Fungi	NA	NA	NA	NA	NA	NA
KT328750.1	isolate OTU 178 18S ribosomal RNA gene, partial sequence; internal transcribed spacer 1, 5.8S ribosomal RNA gene, and internal transcribed spacer 2, complete sequence; and 28S ribosomal RNA gene, partial sequence	Fungi	NA	NA	NA	NA	NA	NA
KT328763.1	isolate OTU 149 18S ribosomal RNA gene, partial sequence; internal transcribed spacer 1, 5.8S ribosomal RNA gene, and internal transcribed spacer 2, complete sequence; and 28S ribosomal RNA gene, partial sequence	Fungi	NA	NA	NA	NA	NA	NA
KT328824.1	isolate OTU 97 18S ribosomal RNA gene, partial sequence; internal transcribed spacer 1, 5.8S ribosomal RNA gene, and internal transcribed spacer 2, complete sequence; and 28S ribosomal RNA gene, partial sequence	Fungi	NA	NA	NA	NA	NA	NA
KT351650.1	clone 58MS_4e internal transcribed spacer 1, partial sequence; 5.8S ribosomal RNA gene and internal transcribed spacer 2, complete sequence; and 28S ribosomal RNA gene, partial sequence	Fungi	NA	NA	NA	NA	NA	NA
KT581718.1	Uncultured soil fungus clone WPW-OTU-16 18S ribosomal RNA gene, partial sequence; internal transcribed spacer 1, 5.8S ribosomal RNA gene, and internal transcribed spacer 2, complete sequence; and 28S ribosomal RNA gene, partial sequence	Fungi	NA	NA	NA	NA	NA	NA
KT581722.1	Uncultured Ascomycota clone WPW-OTU-20 18S ribosomal RNA gene, partial sequence; internal transcribed spacer 1, 5.8S ribosomal RNA gene, and internal transcribed spacer 2, complete sequence; and 28S ribosomal RNA gene, partial sequence	Fungi	Ascomycota	NA	NA	NA	NA	NA
KT799183.1	clone 2-16 18S ribosomal RNA gene, partial sequence; internal transcribed spacer 1, 5.8S ribosomal RNA gene, and internal transcribed spacer 2, complete sequence; and 28S ribosomal RNA gene, partial sequence	Fungi	NA	NA	NA	NA	NA	NA
KX098077.1	Fungal sp. strain Xmf104 internal transcribed spacer 1, partial sequence; 5.8S ribosomal RNA gene and internal transcribed spacer 2, complete sequence; and large subunit ribosomal RNA gene, partial sequence	Fungi	NA	NA	NA	NA	NA	NA
KX098340.1	Bacidia sp. WSL DF72 18S ribosomal RNA gene, partial sequence; internal transcribed spacer 1, 5.8S ribosomal RNA gene, and internal transcribed spacer 2, complete sequence; and 28S ribosomal RNA gene, partial sequence	Fungi	Ascomycota	Dothideomycetes	Lecanorales	Ramalinaceae	Bacidia	NA
KX192677.1	clone 255 internal transcribed spacer 2, partial sequence	Fungi	NA	NA	NA	NA	NA	NA
KX193183.1	clone 762 internal transcribed spacer 2, partial sequence	Fungi	NA	NA	NA	NA	NA	NA
KX193543.1	clone 1122 internal transcribed spacer 2, partial sequence	Fungi	NA	NA	NA	NA	NA	NA
KX194358.1	clone 1937 internal transcribed spacer 2, partial sequence	Fungi	NA	NA	NA	NA	NA	NA
KX194487.1	clone 2066 internal transcribed spacer 2, partial sequence	Fungi	NA	NA	NA	NA	NA	NA
KX194986.1	clone 2565 internal transcribed spacer 2, partial sequence	Fungi	NA	NA	NA	NA	NA	NA
KX195364.1	clone 2943 internal transcribed spacer 2, partial sequence	Fungi	NA	NA	NA	NA	NA	NA
KX195582.1	clone 3161 internal transcribed spacer 2, partial sequence	Fungi	NA	NA	NA	NA	NA	NA
KX195623.1	clone 3202 internal transcribed spacer 2, partial sequence	Fungi	NA	NA	NA	NA	NA	NA
KX195824.1	clone 3403 internal transcribed spacer 2, partial sequence	Fungi	NA	NA	NA	NA	NA	NA
KX195855.1	clone 3434 internal transcribed spacer 2, partial sequence	Fungi	NA	NA	NA	NA	NA	NA
KX195877.1	clone 3456 internal transcribed spacer 2, partial sequence	Fungi	NA	NA	NA	NA	NA	NA
KX196035.1	clone 3614 internal transcribed spacer 2, partial sequence	Fungi	NA	NA	NA	NA	NA	NA
KX196040.1	clone 3619 internal transcribed spacer 2, partial sequence	Fungi	NA	NA	NA	NA	NA	NA
KX196103.1	clone 3682 internal transcribed spacer 2, partial sequence	Fungi	NA	NA	NA	NA	NA	NA
KX196140.1	clone 3719 internal transcribed spacer 2, partial sequence	Fungi	NA	NA	NA	NA	NA	NA
KY322130.1	clone AO60 5.8S ribosomal RNA gene and internal transcribed spacer 2, partial sequence	Fungi	NA	NA	NA	NA	NA	NA
KY574451.1	Uncultured Rhizopycnis clone RGO_OMG156 small subunit ribosomal RNA gene, partial sequence; internal transcribed spacer 1, 5.8S ribosomal RNA gene, and internal transcribed spacer 2, complete sequence; and large subunit ribosomal RNA gene, partial sequence	Fungi	Ascomycota	Dothideomycetes	Pleosporales	Morosphaeriaceae	Rhizopycnis	NA
KY774039.1	Coltricia sp. isolate PGK13_029 internal transcribed spacer 1, partial sequence; 5.8S ribosomal RNA gene, complete sequence; and internal transcribed spacer 2, partial sequence	Fungi	Basidiomycota	Agaricomycetes	Hymenochaetales	Hymenochaetaceae	Coltricia	NA
KY776190.1	Fungal sp. isolate PS2340 internal transcribed spacer 1, partial sequence; 5.8S ribosomal RNA gene and internal transcribed spacer 2, complete sequence; and large subunit ribosomal RNA gene, partial sequence	Fungi	NA	NA	NA	NA	NA	NA
LC126439.1	Rhodosporidium sp. 14Y312 genes for ITS1, 5.8S rRNA, ITS2, partial and complete sequence	Fungi	Basidiomycota	Microbotryomycetes	Sporidiobolales	Sporidiobolaceae	Rhodotorula	NA
LT796836.1	Trematophoma sp. 1 NV-2015 genomic DNA sequence contains ITS1, 5.8S rRNA gene and ITS2, culture collection UTHSC:DI16-210	Fungi	Ascomycota	Dothideomycetes	Pleosporales	Melanommataceae	Trematophoma	NA
MF484667.1	Uncultured Entomophthoromycota isolate soil 3463 5.8S ribosomal RNA gene, partial sequence; internal transcribed spacer 2, complete sequence; and large subunit ribosomal RNA gene, partial sequence	Fungi	Zoopagomycota	NA	NA	NA	NA	NA
MF487437.1	Uncultured Glomerellales isolate soil 6238 5.8S ribosomal RNA gene, partial sequence; internal transcribed spacer 2, complete sequence; and large subunit ribosomal RNA gene, partial sequence	Fungi	Ascomycota	Sordariomycetes	Glomerellales	NA	NA	NA
MF568812.1	clone 131 5.8S ribosomal RNA gene, partial sequence; internal transcribed spacer 2, complete sequence; and large subunit ribosomal RNA gene, partial sequence	Fungi	NA	NA	NA	NA	NA	NA
MF569496.1	clone 896 5.8S ribosomal RNA gene, partial sequence; internal transcribed spacer 2, complete sequence; and large subunit ribosomal RNA gene, partial sequence	Fungi	NA	NA	NA	NA	NA	NA
MF569509.1	clone 914 5.8S ribosomal RNA gene, partial sequence; internal transcribed spacer 2, complete sequence; and large subunit ribosomal RNA gene, partial sequence	Fungi	NA	NA	NA	NA	NA	NA
MF569542.1	clone 953 internal transcribed spacer 2 and large subunit ribosomal RNA gene, partial sequence	Fungi	NA	NA	NA	NA	NA	NA
MF569856.1	clone 1310 5.8S ribosomal RNA gene, partial sequence; internal transcribed spacer 2, complete sequence; and large subunit ribosomal RNA gene, partial sequence	Fungi	NA	NA	NA	NA	NA	NA
MF570444.1	clone 2005 5.8S ribosomal RNA gene, partial sequence; internal transcribed spacer 2, complete sequence; and large subunit ribosomal RNA gene, partial sequence	Fungi	NA	NA	NA	NA	NA	NA
MF570502.1	clone 2074 5.8S ribosomal RNA gene, partial sequence; internal transcribed spacer 2, complete sequence; and large subunit ribosomal RNA gene, partial sequence	Fungi	NA	NA	NA	NA	NA	NA
MF570730.1	clone 2351 5.8S ribosomal RNA gene, partial sequence; internal transcribed spacer 2, complete sequence; and large subunit ribosomal RNA gene, partial sequence	Fungi	NA	NA	NA	NA	NA	NA
MF570984.1	clone 2655 5.8S ribosomal RNA gene, partial sequence; internal transcribed spacer 2, complete sequence; and large subunit ribosomal RNA gene, partial sequence	Fungi	NA	NA	NA	NA	NA	NA
MF571055.1	clone 2739 5.8S ribosomal RNA gene, partial sequence; internal transcribed spacer 2, complete sequence; and large subunit ribosomal RNA gene, partial sequence	Fungi	NA	NA	NA	NA	NA	NA
MF571333.1	clone 3052 5.8S ribosomal RNA gene, partial sequence; internal transcribed spacer 2, complete sequence; and large subunit ribosomal RNA gene, partial sequence	Fungi	NA	NA	NA	NA	NA	NA
MF571433.1	clone 3161 internal transcribed spacer 2 and large subunit ribosomal RNA gene, partial sequence	Fungi	NA	NA	NA	NA	NA	NA
MF971330.1	clone OTU302 18S ribosomal RNA gene, internal transcribed spacer 1, 5.8S ribosomal RNA gene, internal transcribed spacer 2, and 28S ribosomal RNA gene, region	Fungi	NA	NA	NA	NA	NA	NA
MF971331.1	clone OTU303 18S ribosomal RNA gene, internal transcribed spacer 1, 5.8S ribosomal RNA gene, internal transcribed spacer 2, and 28S ribosomal RNA gene, region	Fungi	NA	NA	NA	NA	NA	NA
MF971434.1	clone OTU438 18S ribosomal RNA gene, internal transcribed spacer 1, 5.8S ribosomal RNA gene, internal transcribed spacer 2, and 28S ribosomal RNA gene, region	Fungi	NA	NA	NA	NA	NA	NA
MF971608.1	clone OTU657 18S ribosomal RNA gene, internal transcribed spacer 1, 5.8S ribosomal RNA gene, internal transcribed spacer 2, and 28S ribosomal RNA gene, region	Fungi	NA	NA	NA	NA	NA	NA
MF971664.1	clone OTU741 18S ribosomal RNA gene, internal transcribed spacer 1, 5.8S ribosomal RNA gene, internal transcribed spacer 2, and 28S ribosomal RNA gene, region	Fungi	NA	NA	NA	NA	NA	NA
MF971783.1	clone OTU886 18S ribosomal RNA gene, internal transcribed spacer 1, 5.8S ribosomal RNA gene, internal transcribed spacer 2, and 28S ribosomal RNA gene, region	Fungi	NA	NA	NA	NA	NA	NA
MG813221.1	Cyphellophora sp. culture MUT<ITA>:2862 small subunit ribosomal RNA gene, partial sequence; internal transcribed spacer 1, 5.8S ribosomal RNA gene, and internal transcribed spacer 2, complete sequence; and large subunit ribosomal RNA gene, partial sequence	Fungi	Ascomycota	Eurotiomycetes	Chaetothyriales	Cyphellophoraceae	Cyphellophora	NA
MN957057.1	Sordariomycetes sp. isolate OTU_48 5.8S ribosomal RNA gene, partial sequence; internal transcribed spacer 2, complete sequence; and large subunit ribosomal RNA gene, partial sequence	Fungi	Ascomycota	Sordariomycetes	NA	NA	NA	NA
MN957113.1	Dothideomycetes sp. isolate OTU_104 5.8S ribosomal RNA gene, partial sequence; internal transcribed spacer 2, complete sequence; and large subunit ribosomal RNA gene, partial sequence	Fungi	Ascomycota	Dothideomycetes	NA	NA	NA	NA
MN957141.1	Dothideomycetes sp. isolate OTU_132 5.8S ribosomal RNA gene, partial sequence; internal transcribed spacer 2, complete sequence; and large subunit ribosomal RNA gene, partial sequence	Fungi	Ascomycota	Dothideomycetes	NA	NA	NA	NA
MN957516.1	Sordariomycetes sp. isolate OTU_520 5.8S ribosomal RNA gene, partial sequence; internal transcribed spacer 2, complete sequence; and large subunit ribosomal RNA gene, partial sequence	Fungi	Ascomycota	Sordariomycetes	NA	NA	NA	NA

## Sheet: Nematoda
Class	Order	Family	Genus	Species
Chromadorea	Rhabditida	Rhabditidae	cruznema	NA
Chromadorea	Strongylida	NA	NA	NA
Enoplea	Mononchida	Mononchidae	Actus	Actus salvadoricus
Chromadorea	Strongylida	Heterorhabditidae	Heterorhabditis	Heterorhabditis indica
Chromadorea	Rhabditida	Steinernematidae	Steinernema	Steinernema feltiae
Chromadorea	Strongylida	Heterorhabditidae	Heterorhabditis	Heterorhabditis bacteriophora
Chromadorea	Rhabditida	Steinernematidae	Steinernema	Steinernema scapterisci
Chromadorea	Rhabditida	Cephalobidae	Acrobeloides	Acrobeloides saeedi
Chromadorea	Strongylida	Heterorhabditidae	Heterorhabditis	Heterorhabditis zealandica
Chromadorea	Rhabditida	Steinernematidae	Steinernema	Steinernema glaseri
Chromadorea	Rhabditida	Cephalobidae	Acrobeles	Acrobeles complexus
Chromadorea	Rhabditida	Tylenchulidae	Tylenchulus	Tylenchulus semipenetrans
Chromadorea	Rhabditida	Cephalobidae	Acrobeloides	Acrobeloides nanus
Chromadorea	Rhabditida	Aphelenchidae	Aphelenchus	Aphelenchus avenae
Chromadorea	Rhabditida	Panagrolaimidae	Panagrolaimus	Panagrolaimus superbus
Chromadorea	Rhabditida	Rhabditidae	Oscheius	Oscheius tipulae
Chromadorea	Rhabditida	Belonolaimidae	NA	NA
Chromadorea	Rhabditida	Cephalobidae	Pseudacrobeles	Pseudacrobeles sp. JB056
Chromadorea	Rhabditida	Cephalobidae	Heterocephalobellus	Heterocephalobellus sp. JB008
Chromadorea	Rhabditida	Pratylenchidae	Pratylenchus	Pratylenchus sp.
Chromadorea	Monhysterida	Monhysteridae	Geomonhystera	NA
