# Supplementary material for: Arthropod Community Responses Reveal Potential Predators and Prey of Entomopathogenic Nematodes in a Citrus Orchard
Source: MDPI journal article supplement (doi:10.3390/agronomy12102502), 2022-10-13
Supplement: s1 [file s1 › supplementary table S2.xlsx]

## Sheet: Sheet1
General Linear Model: ln total nematodes versus Treatment, sampling Day, replication
Method
Factor coding	(-1, 0, +1)
Factor Information
Factor	Type	Levels	Values
Treatment	Fixed	3	Control, Hb, Sf
Sampling Day	Fixed	4	3, 7, 14, 28
replication(Treatment)	Random	24	1(Control), 2(Control), 3(Control), 4(Control),
			5(Control), 6(Control), 7(Control), 8(Control),
			1(Hb), 2(Hb), 3(Hb), 4(Hb), 5(Hb), 6(Hb), 7(Hb),
			8(Hb), 1(Sf), 2(Sf), 3(Sf), 4(Sf), 5(Sf), 6(Sf),
			7(Sf), 8(Sf)
Analysis of Variance
Source	DF	Adj SS	Adj MS	F-Value	P-Value
Treatment	2	15.105	7.5526	9.8	0.001
Sampling Day	3	1.118	0.3727	1.2	0.317
Treatment*Sampling Day	6	7.475	1.2459	4.01	0.002
replication(Treatment)	21	16.186	0.7708	2.48	0.003
Error	63	19.581	0.3108
Total	95	59.465
Model Summary
S	R-sq	R-sq(adj)	R-sq(pred)
0.557497	0.6707	0.5035	0.2354
