# Supplementary material for: Arthropod Community Responses Reveal Potential Predators and Prey of Entomopathogenic Nematodes in a Citrus Orchard
Source: MDPI journal article supplement (doi:10.3390/agronomy12102502), 2022-10-13
Supplement: s1 [file s1 › supplementary table S3.xlsx]

## Sheet: Sheet1
General Linear Model: ln native nematodes versus Treatment, sampling Day, replication
Method
Factor coding		(-1, 0, +1)
Factor Information
Factor	Type	Levels	Values
Treatment	Fixed	3	Control, Hb, Sf
Sampling Day	Fixed	4	3, 7, 14, 28
replication(Treatment)	Random	24	1(Control), 2(Control), 3(Control), 4(Control),
			5(Control), 6(Control), 7(Control), 8(Control),
			1(Hb), 2(Hb), 3(Hb), 4(Hb), 5(Hb), 6(Hb), 7(Hb),
			8(Hb), 1(Sf), 2(Sf), 3(Sf), 4(Sf), 5(Sf), 6(Sf),
			7(Sf), 8(Sf)
Analysis of Variance
Source	DF	Adj SS	Adj MS	F-Value	P-Value
Treatment	2	3.248	1.6240	1.85	0.182
Sampling Day	3	1.824	0.6080	1.56	0.209
Treatment*Sampling Day	6	9.412	1.5687	4.02	0.002
replication(Treatment)	21	18.458	0.8789	2.25	0.007
Error	63	24.596	0.3904
Total	95	57.538
Model Summary
S	R-sq	R-sq(adj)	R-sq(pred)
0.624826	57.25%	35.54%	0.74%
